# Supplementary material
Source: PubMed Central journal article supplement (PMC9237731)
Supplement: kiac118_supplementary_data.pdf [file kiac118_supplementary_data.pdf]

## Supplemental Figures

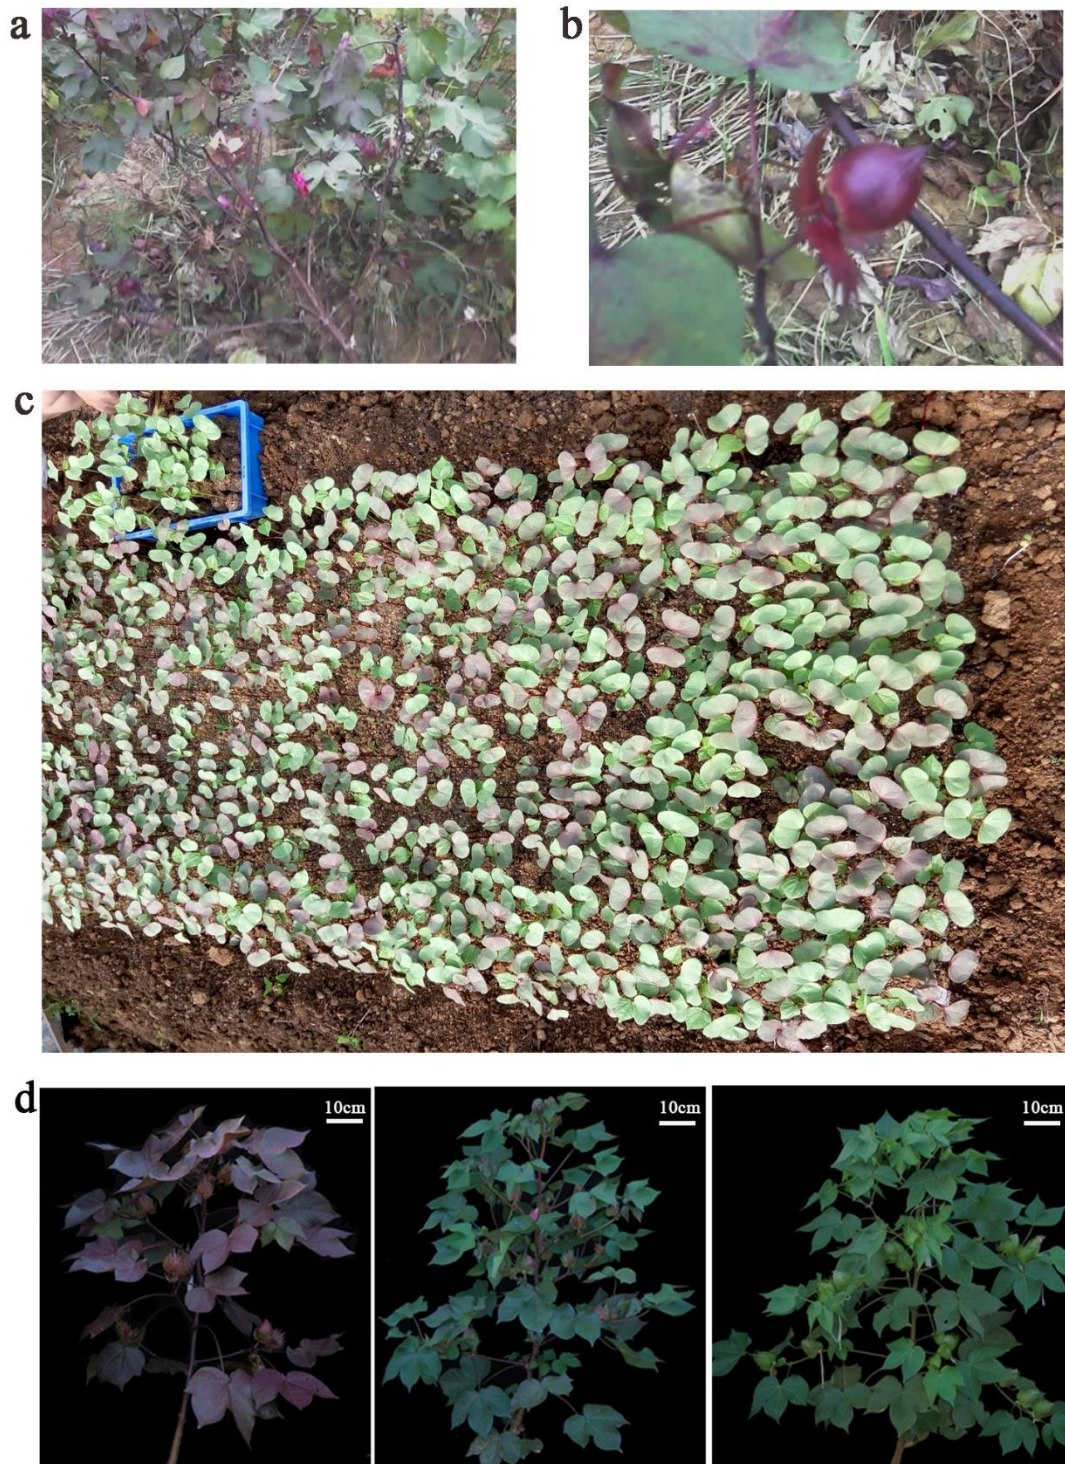

**Supplemental Figure S1. A single red foliated cotton mutant appeared in the hybrid population of E22 and 3-79. a-b.** Field phenotype of red foliated mutants photographed using a Motorola V3 camera. The whole plant is red. **c.** Phenotype of F<sub>2</sub> segregating population on seedbed. **d.** Field pictures of three phenotypes in the segregating population- red foliated plant, the intermediate type and the green plant.

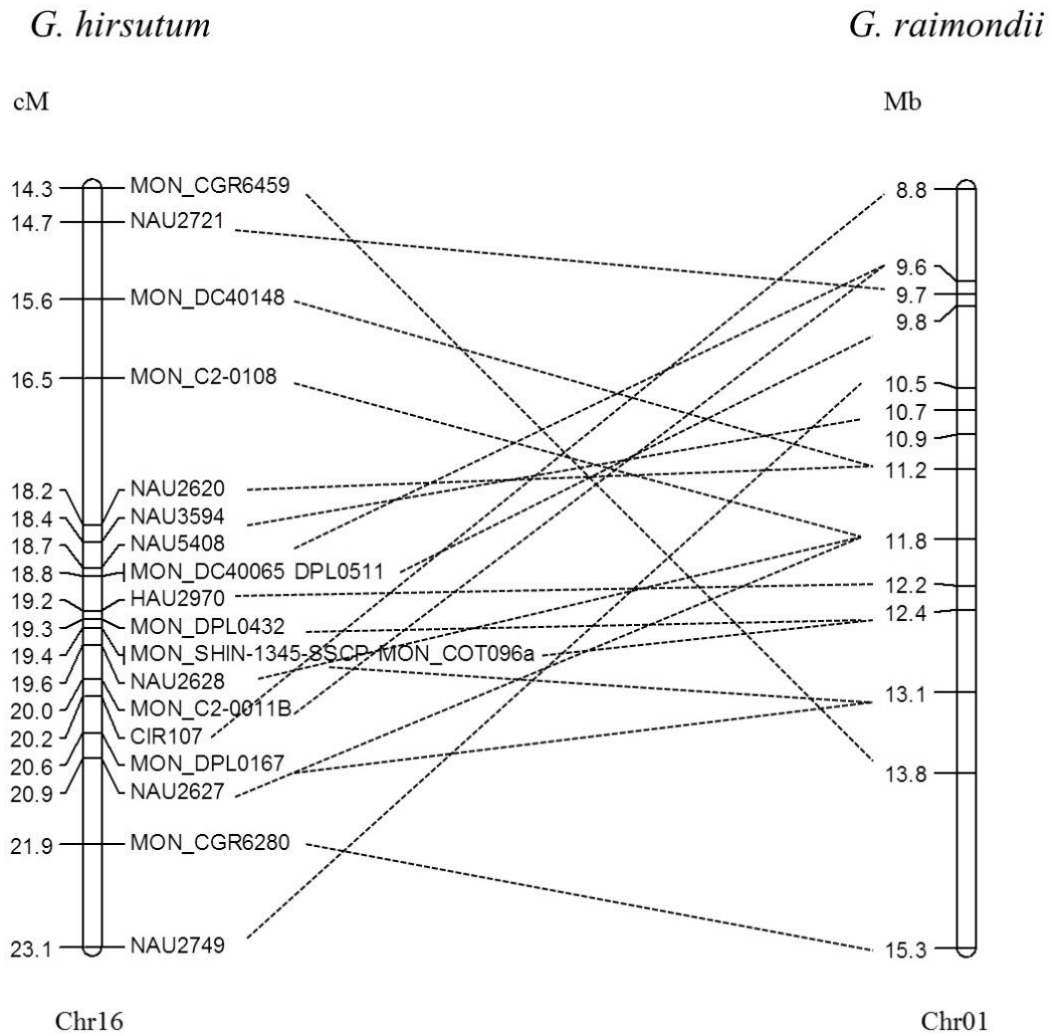

**Supplemental Figure S2. Alignment relationship of markers linked to *Re* between *G. hirsutum* and *G. raimondii*.** The left side is the *G. hirsutum* genetic linkage map, and the right side is the corresponding marker alignment in the *G. raimondii* genome.





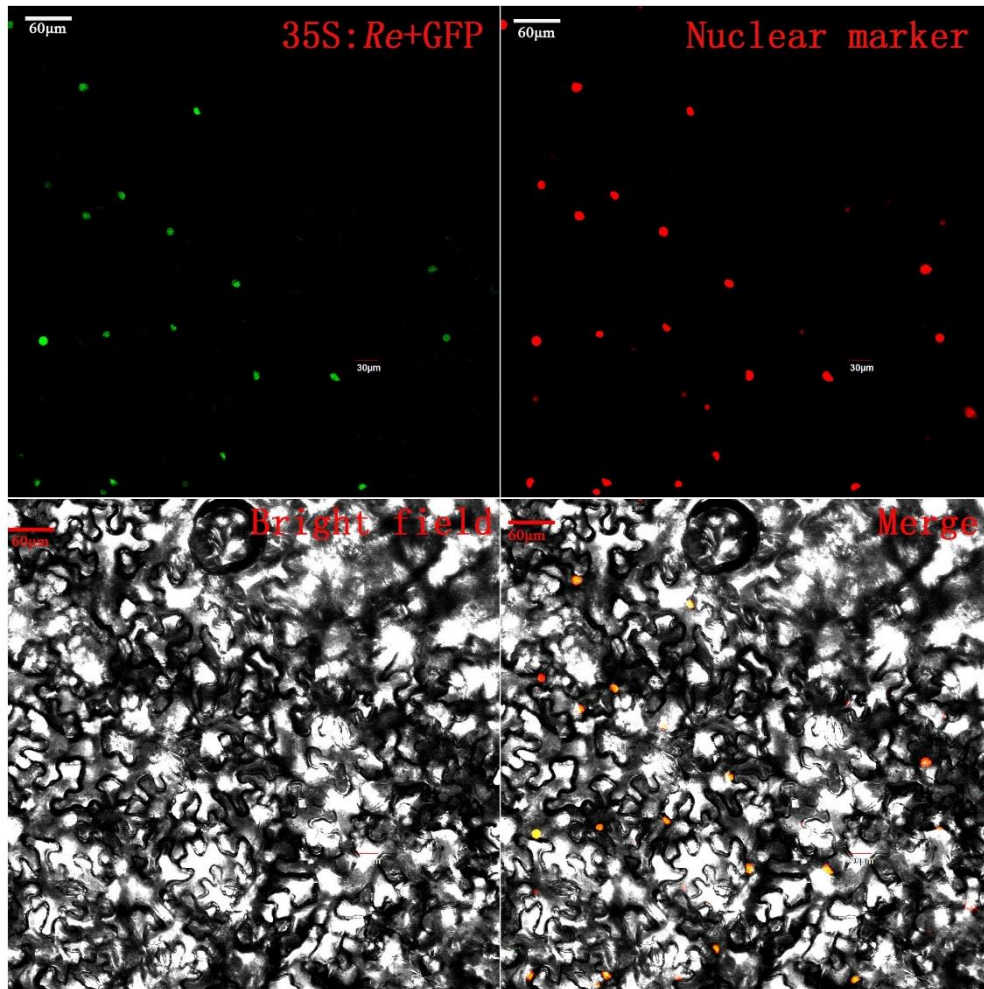

**Supplemental Figure S4. Subcellular localization of *Re*.** 35S: *Re+GFP* is an overexpression vector of *Re* fused with GFP. The nuclear marker is a red fluorescent protein (RFP) located in the nucleus. *Re* functions in the nucleus.

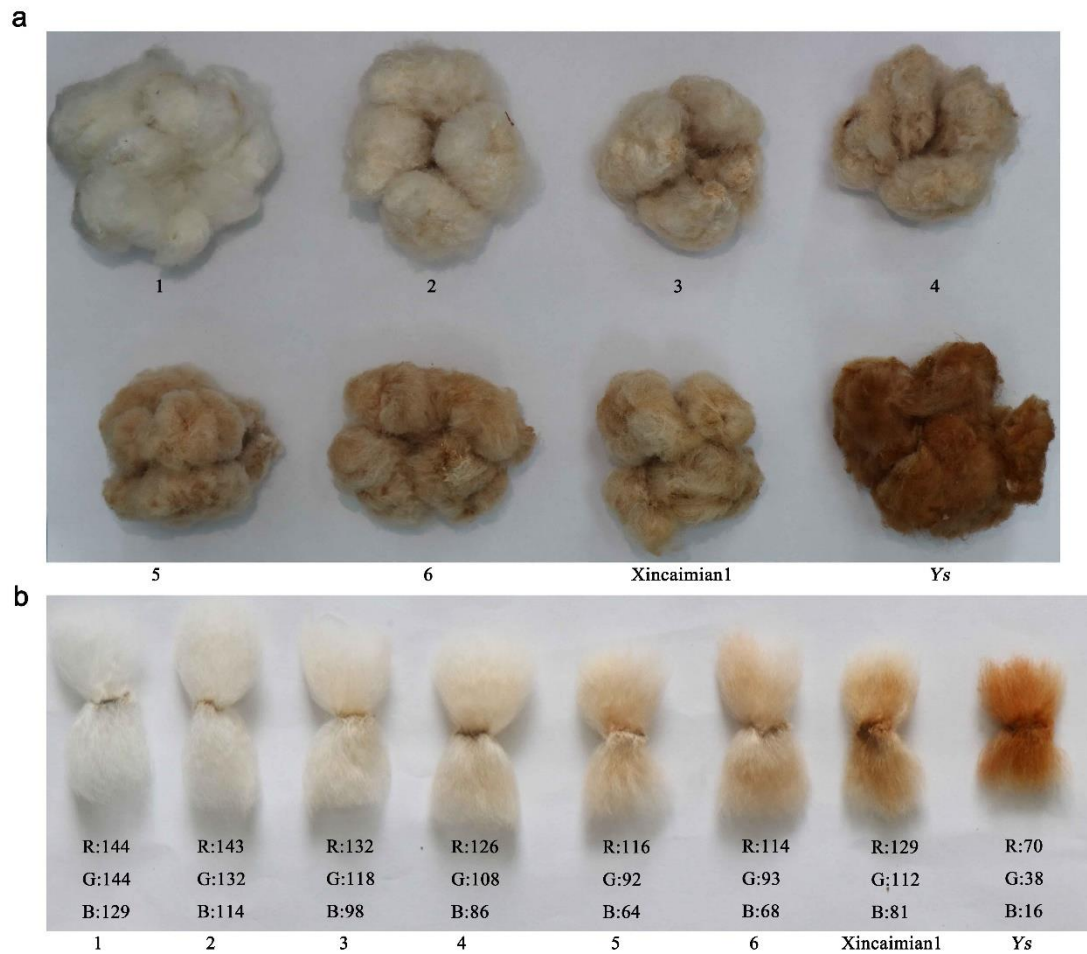

**Supplemental Figure S5. The specific expression of *Re* in the fiber producing different shades of brown cotton. a.** The color of cotton bolls. Numbers 1-6 represent different transgenic lines. Xincaimian1 and Ys are the existing light brown fiber cotton and dark brown fiber cotton used as control. **b.** The color of the unfolded fiber. The RGB value is obtained using color picker tool of Photoshop.

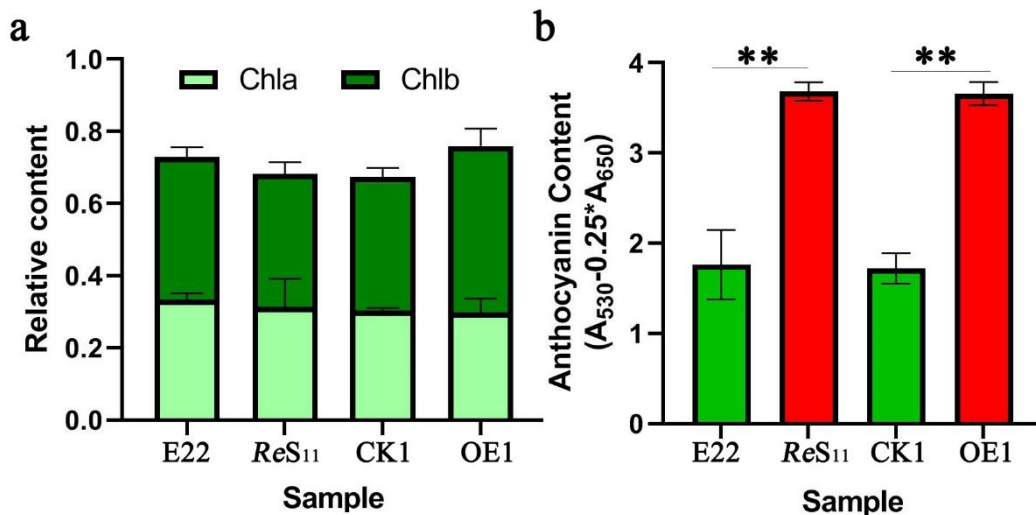

**Supplemental Figure S6. Determination of relative content of anthocyanin and chlorophyll in leaves.** **a.** Determination of chlorophyll content of E22, ReS<sub>11</sub>, CK1 and OE1 in leaves. No significant difference was detected. **b.** Determination of anthocyanin content of E22, ReS<sub>11</sub>, CK1 and OE1 in leaves. The anthocyanin content in ReS<sub>11</sub> and OE1 leaves was significantly higher than that in green plants. For **a** and **b**, error bars represent  $\pm$ SD (3 biological replicates). The statistical significance was calculated using a *t* test (\*\* $P < 0.01$ , \* $P < 0.05$ ).

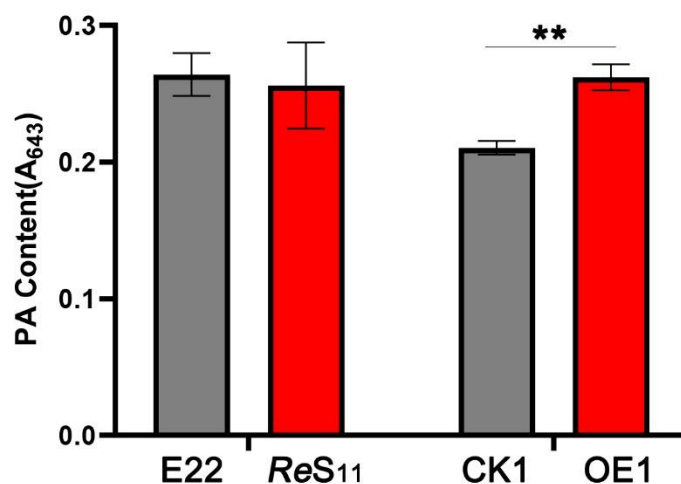

**Supplemental Figure S7. Determination of relative content of PA in leaves.** There was no difference in PA content of E22 and ReS<sub>11</sub> leaves. But the PA content in OE1 is significantly higher than that in CK1. Error bars represent  $\pm$ SD (3 biological replicates). The statistical significance was calculated using a *t* test (\*\* $P < 0.01$ , \* $P < 0.05$ ).

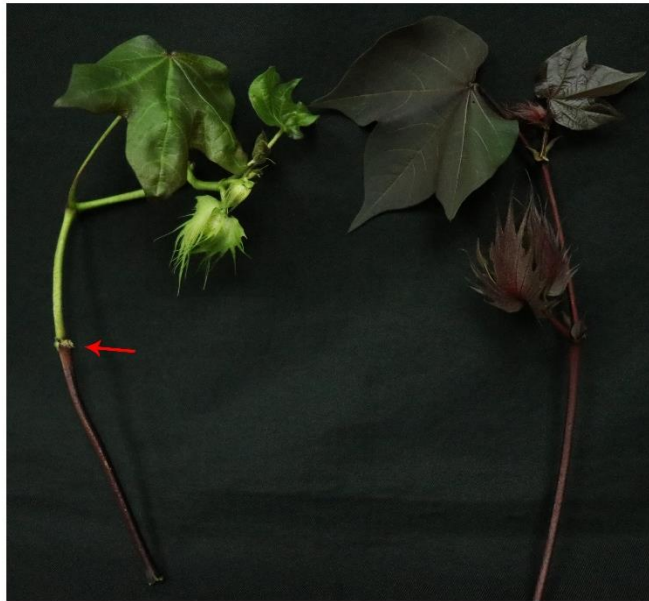

Bagging for 7 days

Not bagged

**Supplemental Figure S8. The effect of natural light on leaf color.** One week of bagging made *ReS*<sub>11</sub> leaves turn green, and there was a clear cut at the interface between bagging and non-bagging where the arrow points.



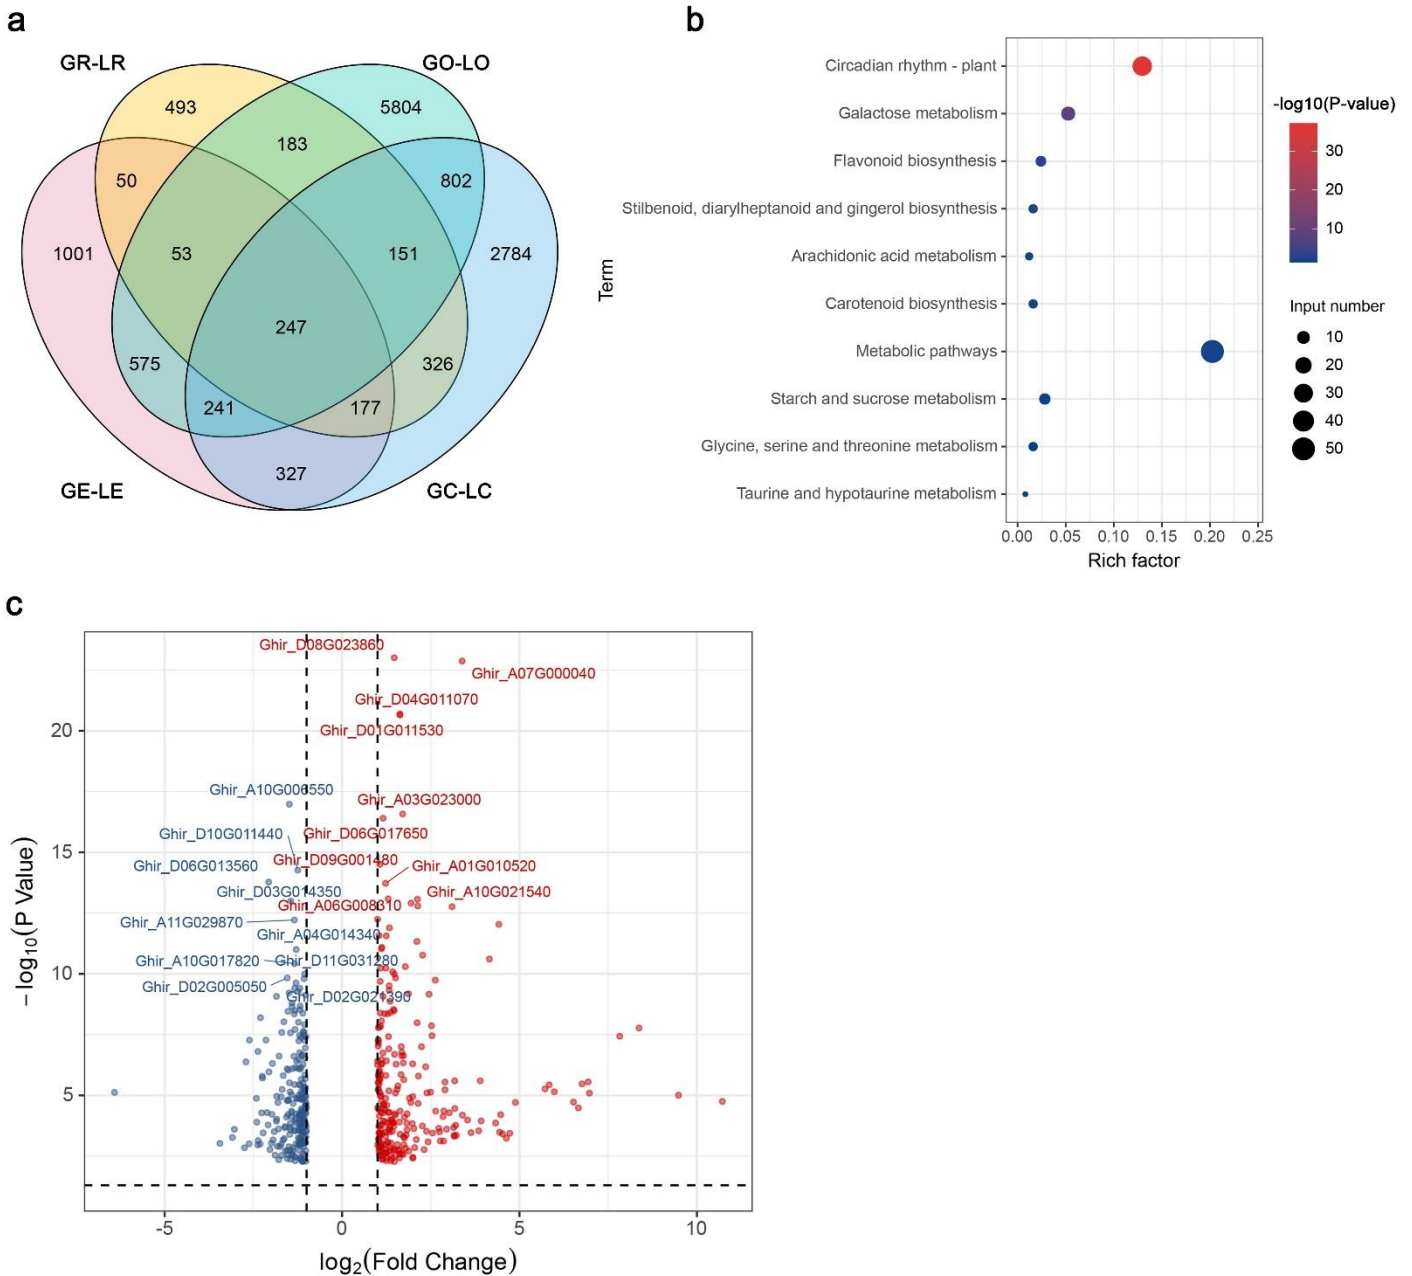

**Supplemental Figure S9. DEGs under natural light and greenhouse conditions. a.** Venn diagrams of DEGs of GR-LR, GO-LO, GE-LE and GC-LC. In which, "G, L" represent "greenhouse" and "natural light" conditions, respectively, and "R, E, C, O" represent *ReS*<sub>11</sub>, E22, CK1 and OE1, respectively. **b.** KEGG enrichment analysis of the 247 overlapping genes. These genes are mainly enriched in metabolic pathway and circadian biosynthesis pathway. **c.** Changes in the expression levels of 493 GR-LR specific DEGs. Blue means down-regulation, red means up-regulation.



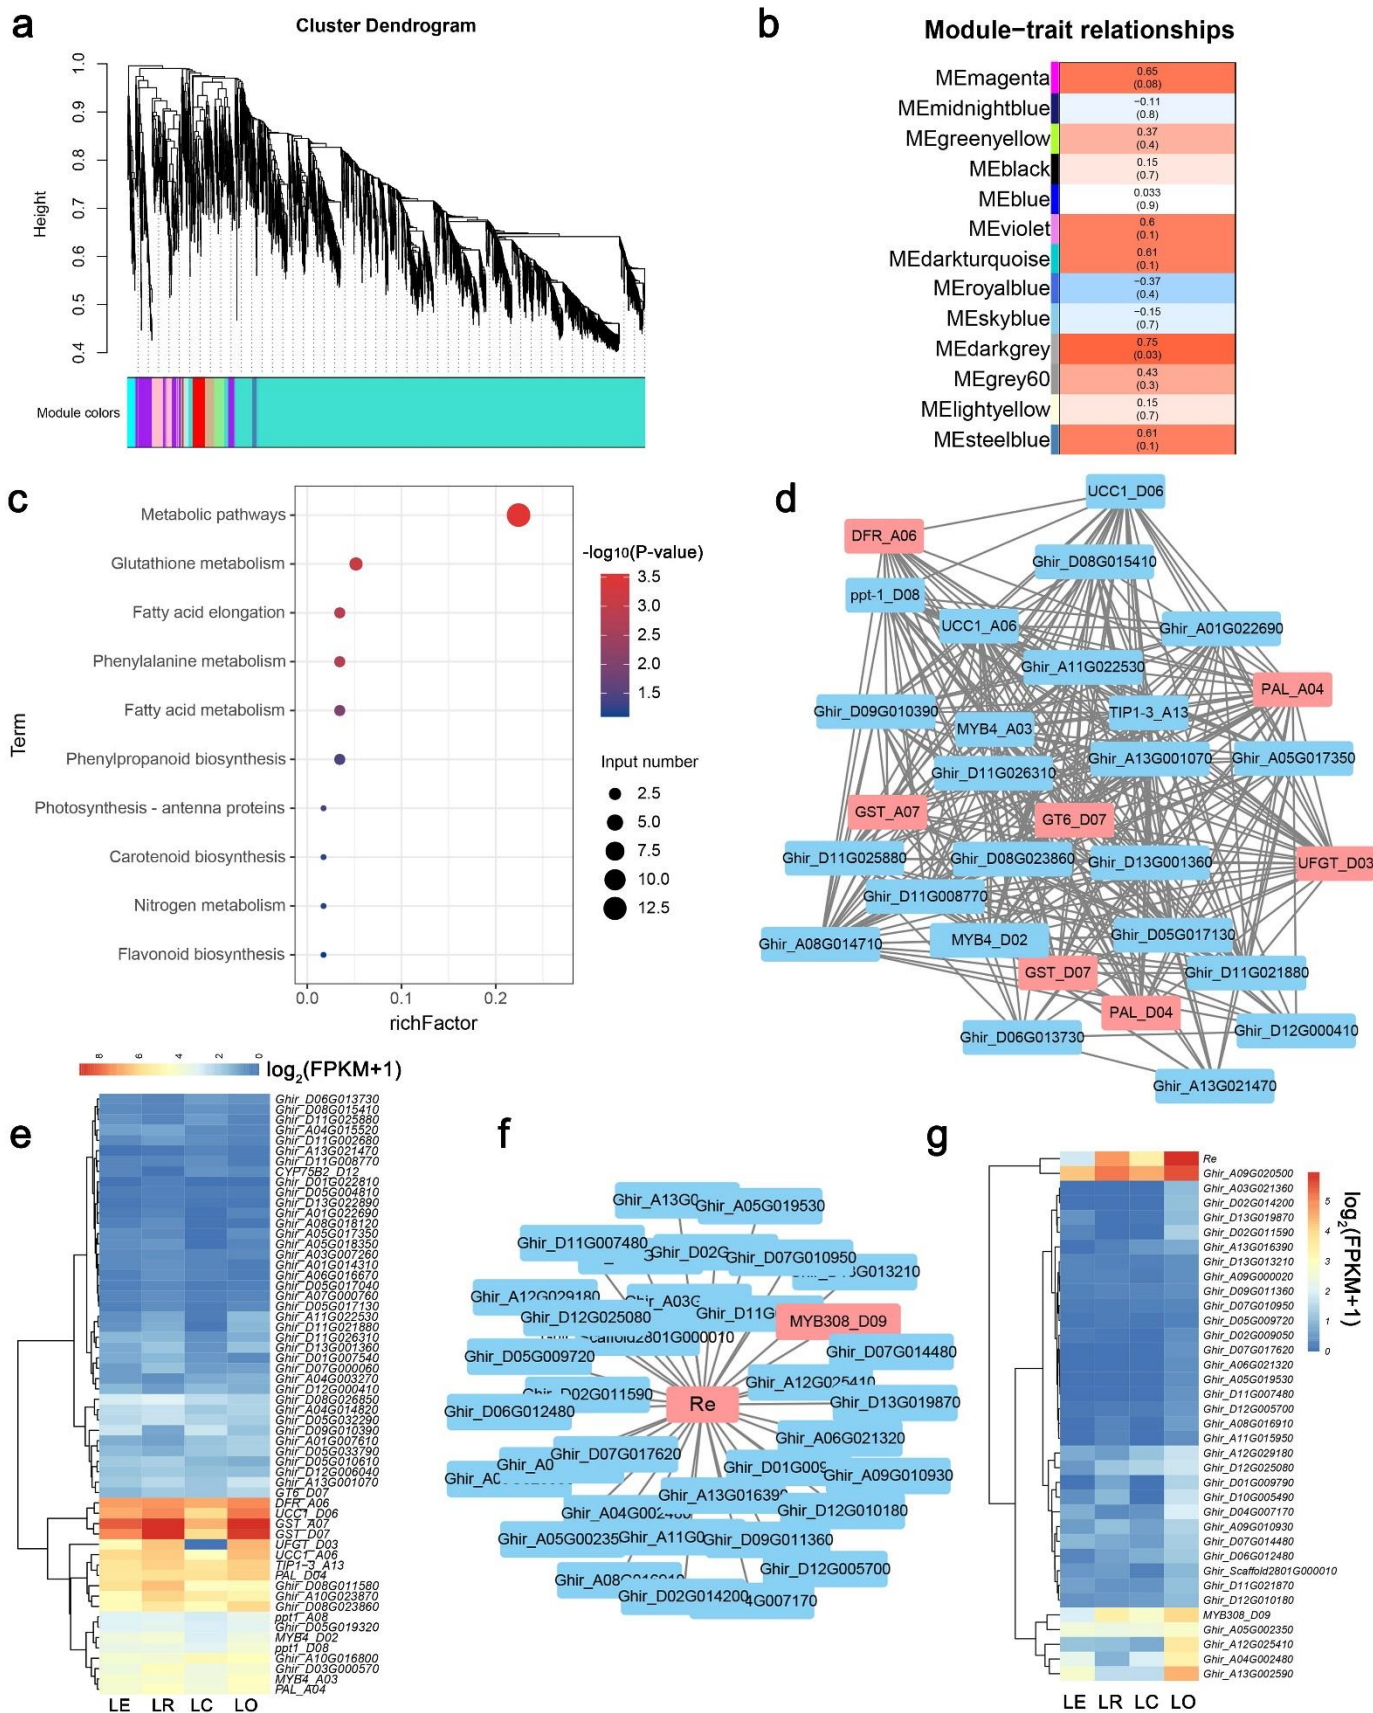

**Supplemental Figure S10. WGCNA of DEGs.** **a.** All DEGs between pairwise comparisons are clustered into 34 modules. Each color represents a module. **b.** The correlation between module and anthocyanin content. The upper value in each small

rectangle represents the module-trait correlation, and the value in brackets is the corresponding P value. MEdarkgrey has the highest correlation with anthocyanin content, while *Re* belongs to MEsteelblue. **c.** KEGG enrichment analysis of genes in MEdarkgrey. **d.** Coexpression network of genes in MEdarkgrey. **e.** Heat map of gene expression in MEdarkgrey, drawn according to FPKM value by RNA-Seq. **f.** Gene network coexpressed with *Re*. **g.** Expression heatmap of genes coexpressed with *Re*, drawn according to FPKM value. "LR, LE, LC, LO" represent *ReS*<sub>11</sub>, E22, CK1 and OE1 in "natural light" condition, respectively.

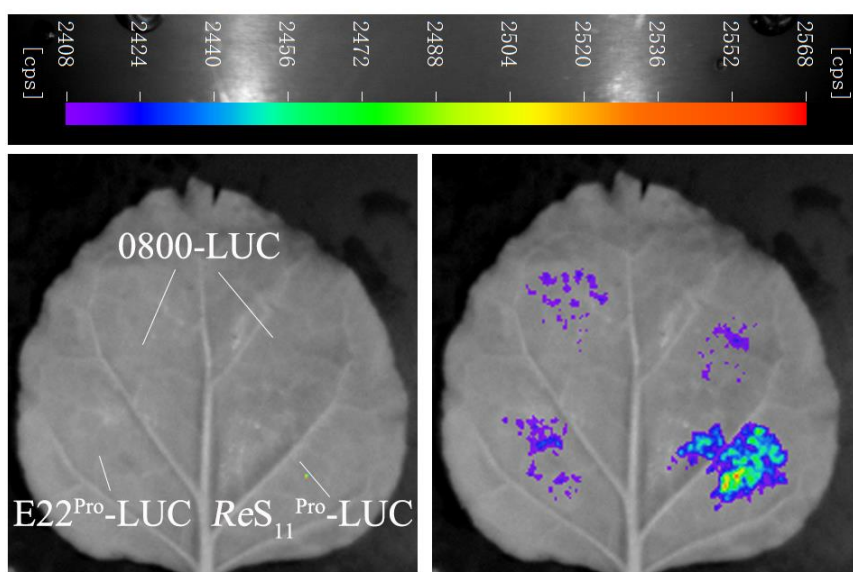

**Supplemental Figure S11. LUC of *ReS*<sub>11</sub><sup>pro</sup> and *E22*<sup>pro</sup>.** *ReS*<sub>11</sub><sup>pro</sup>-LUC resulted in a stronger signal in *N. benthamiana* leaves after injection.

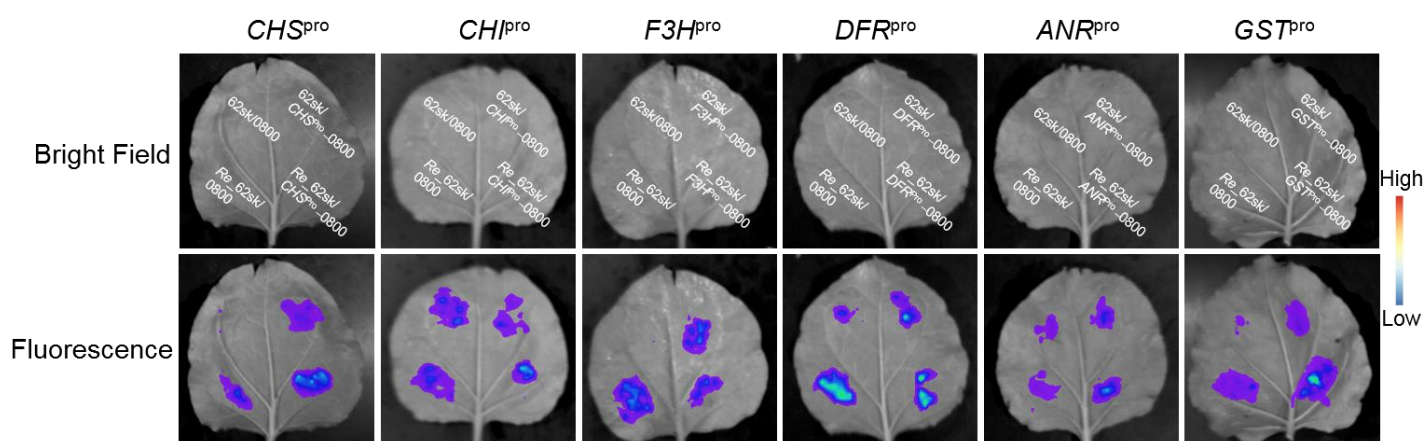

**Supplemental Figure S12. LUC of *Re* and six structural genes.** The 6 structural genes are *CHS*, *CHI*, *F3H*, *DFR*, *ANR* and *GST*, and no strong fluorescent signal is detected.

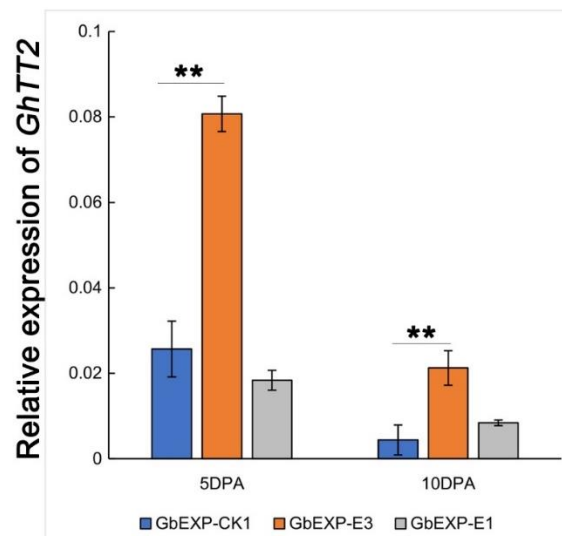

**Supplemental Figure S13. Relative expression of *GhTT2* in fiber-specific transgenic lines of *Re*.** RT-qPCR showed that *GhTT2* had a significantly higher expression in 5DPA (days post-anthesis) and 10DPA fibers of GbEXP-E3 than that in GbEXP-CK1. However, *GhTT2* in GbEXP-E1 showed no significant expression change compared to GbEXP-CK1. Error bars represent  $\pm$ SD (3 biological replicates). The statistical significance was calculated using a *t* test (\*\* $P < 0.01$ , \* $P < 0.05$ ).

## Supplemental Tables

**Supplemental Table S1. Phenotypic statistics of F<sub>2</sub> populations in the field**

| Year | Total | The red plants | The intermediate type | The green plants | Chi-square value |
|------|-------|----------------|-----------------------|------------------|------------------|
| 2013 | 334   | 90             | 152                   | 92               | 2.72             |
| 2014 | 954   | 243            | 484                   | 227              | 0.77             |

**Supplemental Table S2. Distribution of the 494 primers used for polymorphic analysis**

| Chromosome | Marker Number | Coverage (cM) | Chromosome | Marker Number | Coverage (cM) |
|------------|---------------|---------------|------------|---------------|---------------|
| Chr01      | 20            | 0-186.869     | Chr01      | 17            | 0-164.119     |
| Chr02      | 17            | 0-156.034     | Chr02      | 21            | 0-197.102     |
| Chr03      | 16            | 0-164.929     | Chr03      | 11            | 0-94.321      |
| Chr04      | 14            | 0-149.815     | Chr04      | 16            | 0-162.228     |
| Chr05      | 25            | 0-242.761     | Chr05      | 15            | 0-146.947     |
| Chr06      | 19            | 0-171.433     | Chr06      | 28            | 0-252.267     |
| Chr07      | 12            | 0-105.781     | Chr07      | 13            | 0-117.608     |
| Chr08      | 16            | 0-151.021     | Chr08      | 27            | 0-256.028     |
| Chr09      | 17            | 0-148.828     | Chr09      | 18            | 0-169.927     |
| Chr10      | 20            | 0-200.935     | Chr10      | 21            | 0-193.185     |
| Chr11      | 24            | 0-234.766     | Chr11      | 21            | 0-198.852     |
| Chr12      | 25            | 0-238.045     | Chr12      | 18            | 0-172.192     |
| Chr13      | 22            | 0-208.138     | Chr13      | 21            | 0-211.897     |
| At         | 247           | 2359.355      | Dt         | 247           | 2336.673      |



**Supplemental Table S3. Polymorphic rates of the primers selected from the genetic map**

| Origin                        | Primer     | Nnumber of primers | Number of polymorphic primers | Number of polymorphic loci | Polymorphic rate |
|-------------------------------|------------|--------------------|-------------------------------|----------------------------|------------------|
| gSSRs                         | MON        | 106                | 21                            | 23                         | 19.81%           |
|                               | Gh         | 9                  | 1                             | 1                          | 11.11%           |
|                               | BNL        | 24                 | 7                             | 10                         | 29.17%           |
|                               | CIR        | 7                  | 1                             | 1                          | 14.29%           |
|                               | DPL        | 12                 | 3                             | 4                          | 25.00%           |
|                               | JESPR      | 4                  | 1                             | 1                          | 25.00%           |
|                               | MUSB       | 2                  | 0                             | 0                          | 0                |
|                               | TMB        | 9                  | 1                             | 1                          | 11.11%           |
|                               | NBRI-gSSR  | 7                  | 3                             | 4                          | 42.86%           |
|                               | Subtotal   | 180                | 38                            | 45                         | 21.11%           |
| EST-SSR                       | HAU        | 143                | 28                            | 31                         | 19.58%           |
|                               | MGHES      | 3                  | 0                             | 0                          | 0                |
|                               | MUSS       | 5                  | 2                             | 2                          | 40.00%           |
|                               | NAU        | 109                | 17                            | 18                         | 15.60%           |
|                               | STV        | 5                  | 0                             | 0                          | 0.00%            |
|                               | CCRI       | 11                 | 2                             | 2                          | 18.18%           |
|                               | NBRI-eSSR  | 14                 | 2                             | 2                          | 14.29%           |
|                               | Subtotal   | 290                | 51                            | 55                         | 17.59%           |
| SNP+IDPs                      | Ghi        | 5                  | 0                             | 0                          | 0                |
|                               | GhIDP      | 7                  | 0                             | 0                          | 0                |
|                               | GbIDP      | 2                  | 0                             | 0                          | 0                |
|                               | Subtotal   | 14                 | 0                             | 0                          | 0                |
| Intron subgenome fiber target | GhPIP      | 2                  | 0                             | 0                          | 0                |
|                               | Gr-Gh gene | 2                  | 1                             | 1                          | 50.00%           |
|                               | gene       | 1                  | 0                             | 0                          | 0                |
| sequence-specific             | gene       | 3                  | 2                             | 2                          | 66.67%           |
|                               | CCRG       | 1                  | 0                             | 0                          | 0                |
| Pathogenesis-related          | CK         | 1                  | 0                             | 0                          | 0                |
| Total                         |            | 494                | 92                            | 103                        | 18.62%           |

**Supplemental Table S4. 470 pairs of SSR primers**

| Primer       | Forward primer (5'-3') | Reverse primer (5'-3')   |
|--------------|------------------------|--------------------------|
| Chr01_8M-001 | CGATGTTGAACACCAGCATA   | GATAAGGGCAATTTCTGGGT     |
| Chr01_8M-002 | TGCACACTGACAAGATTATGC  | ATTGGTGTCTTGGTTGGAAA     |
| Chr01_8M-003 | CCTTTCACCATTCAACATCC   | GAAACGAGTTGGTGTATCGG     |
| Chr01_8M-004 | TCCCAAGAACAACAAACGAGT  | GTTCAATTTGTTTGTGCGTGA    |
| Chr01_8M-005 | AAGCCATGTGTAACCTACGTG  | GTTGGACCTCGGGTAAGTTT     |
| Chr01_8M-006 | CTCAACCTAATCCAAGACAAGG | GGTAAAGTGGGGAGAGAAAGA    |
| Chr01_8M-007 | AACGTTTCGTTCAATTTACGC  | TCTAGGTGTATGGAGTCCCAGT   |
| Chr01_8M-008 | GCCCGATTCTGAGGTAGTTT   | AGTCAACCCCATCTTGACA      |
| Chr01_8M-009 | TAATGAAGCCTGGATCAACC   | TCAGATACGGGTATGTGCCT     |
| Chr01_8M-010 | TTTCGGGAGCATAGACAAAG   | CCATTTGTAAGATTGTGCGC     |
| Chr01_8M-011 | CTCTTCGTCTTCTTCTTCTCCA | TCATGCAAATCAACATCGAC     |
| Chr01_8M-012 | CCACCCAAGTCAAACACATT   | ATTCTTGGTCCAGCATTGAG     |
| Chr01_8M-013 | GCCATATTGCACAGTTAGTCC  | GCCCATACAGTTTCGTATGC     |
| Chr01_8M-014 | CAAATCACCCACATGGATCT   | CCAAACCCACCCTAAGCTAT     |
| Chr01_8M-015 | CCATTGTTTAGGGTTTGGTG   | TTGAAGATGTCTTGGTTAGTGC   |
| Chr01_8M-016 | TCTGAAATCAACCCCTGGTA   | TTGGAGGGATGCTTCTCATA     |
| Chr01_8M-017 | CTTCTTCTTCTGGTGCGTA    | TGGGGATTTTACCTGACAAA     |
| Chr01_8M-018 | CGGTTGGATTTTGATGTCTC   | TGTACGGTATGTCAAGACGG     |
| Chr01_8M-019 | CATCATCTTTCATGCAACC    | GCTCCCCATTGTCTCCTTAT     |
| Chr01_8M-020 | GTTCACTTGGTTTAAGGCGA   | CAATTTGTCCAATAGCCACC     |
| Chr01_8M-021 | CCGTTACAGCGTAATCTCAAA  | TAATTCCCCGTCAATACCCT     |
| Chr01_8M-022 | ATGGAACCCAATTAAGAGCC   | GCCGAGAAAATCAACAGAGA     |
| Chr01_8M-023 | TTGGTTAGTTGGGAAGGATTC  | CCTTCCAACCTAAAACAGCTACTC |
| Chr01_8M-024 | CCTGTGATCGTAAAACCACC   | CCTCCTACCCCATCAACTCT     |
| Chr01_8M-025 | TGCTTCTTCCTGAAGCATT    | GTGAGAAAAGGAGAGCCACA     |
| Chr01_8M-026 | CAGCACAACAAAATTTGGGA   | TCTAGGAAAAGGAAAGCCTAGAG  |
| Chr01_8M-027 | CGAGGACTAAAACGGGAGAT   | GCATGCCAACTATATCCGAC     |
| Chr01_8M-028 | TTTGCAGGGGGTTTTATGTA   | ACACCTTCTAACCCCAAACC     |
| Chr01_8M-029 | TTAAATCTCACTGCCCTTCG   | GGTCTGTCTTATAGGGGTTT     |
| Chr01_8M-030 | AGGCGGCATAAGCATAAAAT   | CTTTTTCTTCCCCAATTCGT     |
| Chr01_8M-031 | ACTAAGGAAATCCAATGGGC   | ATCCAAAGGTTTGTAAAGGC     |
| Chr01_8M-032 | GCTGTCATGTAAGGAAAGGC   | CTTCATTTTATGGGCAATGG     |
| Chr01_8M-033 | TGTATCGATGAATGGTGTGG   | ATCGAGGGTGCTAATCCTTT     |
| Chr01_8M-034 | CTAAAACGCAAACATTGCC    | CGTCATGTGCTTATTGACATTG   |
| Chr01_8M-035 | TAATACATGGCAGAGCAGCA   | CTTCTGTCATGTAACCCATC     |
| Chr01_8M-036 | CCATCATTTAGGAATGTGGC   | GGCTTATCAGATGGAAGCAA     |
| Chr01_8M-037 | CATATGCTTGCCTTGGAAC    | GCAACTATCGGAGATAGGACC    |
| Chr01_8M-038 | CGCACTTCGTATCTTTGGTT   | TGCATCCCTGTATGATCCTT     |
| Chr01_8M-039 | TTAATCAGCATATTGGCCG    | ATTCAAAGGCACTAGACCCC     |
| Chr01_8M-040 | GAGTTGTCTGTATGGCTCC    | ATCATTTCCCAAACATGCG      |
| Chr01_8M-041 | TGTAGGGCTTTCCGATACTG   | AAGGCGTCAATGTGATTTT      |
| Chr01_8M-042 | GATGTGGCTACTGTGGAACC   | TCCCAGGTCTGATTTTGGTA     |

|              |                         |                        |
|--------------|-------------------------|------------------------|
| Chr01_8M-043 | ACATTATCGGGAGGGACAGT    | GACTCTCTTGGCAATTTTGAGA |
| Chr01_8M-044 | GATGTGGCTACTGTGGAACC    | TCCCAGGTCTGATTTTGGTA   |
| Chr01_8M-045 | GATAGGCGCCAATGAATAAA    | CAAACATGAGGGGACAAGAC   |
| Chr01_8M-046 | GGCTACTCAAAGCAATGGA     | TCTCCCCCTCTCACTCTCTT   |
| Chr01_8M-047 | ACATTATCGGGAGGGACAGT    | GACTCTCTTGGCAATTTTGAGA |
| Chr01_8M-048 | TGGTGGCATGTTTAGAAAGG    | CGTGAGCCAAATTAACAACA   |
| Chr01_8M-049 | AGGGGGAATCAAGGTTTTTA    | GGGTTTTTATGGGGAATTGA   |
| Chr01_8M-050 | TTAGAGAGGGGGAAACTGAAA   | GATGGAGTTGGGTGAGGTAA   |
| Chr01_8M-051 | GCTCTTTGCAAGTGGGATAA    | TTCCGCTTCTATGGTTCGAA   |
| Chr01_8M-052 | GGACCAAATTGACAACCTTTCAC | ATCATGAGCGTTGATTTCGTT  |
| Chr01_8M-053 | GGAAACAGCCATTAAACAA     | GGATTGGCTCTCATCTCTGA   |
| Chr01_8M-054 | CAATCGGCTTCAAAAAGAGA    | CAAAACAGCGTCGTTTCATA   |
| Chr01_8M-055 | TTGGTGGTTTCTTTGACGAT    | GTGTGAGGAAAGGGAATGTG   |
| Chr01_8M-056 | GTTGTATGATCGCGGTTTTT    | ATTTCGGTCGATTATGCTTCA  |
| Chr01_8M-057 | CTGAGCAGCCTCATTCAATTT   | TGGGGAAGAGAAAAGGGTAG   |
| Chr01_8M-058 | TACTGGACTCAGTTCCTGCC    | ATGCTTGAGATCATTGGGAA   |
| Chr01_8M-059 | TCATTAGATGGTAGCGGCTC    | AGAGGAGCTGCAATTGTTGT   |
| Chr01_8M-060 | AAGTCACAAAAGCCGAGATG    | AGAGGAGCTGCAATTGTTGT   |
| Chr01_8M-061 | CCCCAAATCTTGTTTCAATG    | GGCATGGACATGGGTATGTA   |
| Chr01_8M-062 | TAATTTGGTAAAACAGCCCG    | TCGTTCTCGTAATCGTAGGC   |
| Chr01_8M-063 | TTTATCAAGGCGAATCATGC    | CAATTTGTTTCTTCTGCACG   |
| Chr01_8M-064 | AATCTTGACACACTTGACGGA   | GTACATTTCGCGCAAAAAGAG  |
| Chr01_8M-065 | TAAGTCGATCCCCAATCAAA    | CTGAACTGTGCAACTCGGTA   |
| Chr01_8M-066 | TAAGGCCCTCTCTTGTTTT     | TTGCACAATGAACTACCCC    |
| Chr01_8M-067 | CTCCACACCAAAAAGACTGCT   | CAAACATTTGTGGATTTGGG   |
| Chr01_8M-068 | TGGTGGAGGTATGTCGTTTT    | ATGCCACGTAGAGAACAACC   |
| Chr01_8M-069 | GGTCCCGATTTGGTAGTGTT    | CCAAGTCACTTCTTGTTGGG   |
| Chr01_8M-070 | GTTGGGGTAACAAGAAGCAA    | TCCTTAAGGTGGGTTTGGAT   |
| Chr01_8M-071 | GCTTTCAAACCCCTTTTTCC    | TATCCCCCATCTGCACTTTA   |
| Chr01_8M-072 | GGCAGTTTAGTGCCAAAAAG    | GTTGTCAATTTGGTGAGGACC  |
| Chr01_8M-073 | TGGGAAGGACCTTATGTTGA    | TCAAATCCCCTTTTGTCTCA   |
| Chr01_8M-074 | ACCGACACGCTACGTTTTAG    | AAATGTAGACCCATTTGCCA   |
| Chr01_8M-075 | TTCGTAAGCTTTCTTGTGGG    | GAAGGCGTAATGGAAAGTGA   |
| Chr01_8M-076 | CAAACCCAAACTCAATCCA     | CCCAAAGTCAGCTCAACCTA   |
| Chr01_8M-077 | TGCTACTGTCACATGGTTGC    | ATCCCCACAAATGAACAAAC   |
| Chr01_8M-078 | ACAACCTAAAGCAGATGCGG    | AATACACTATGACGGCGGAA   |
| Chr01_8M-079 | CAACCGAAGAAACATCATCC    | TTCCCATTTCCATTAGACA    |
| Chr01_8M-080 | CGAGGGTGAATCTGGAAAT     | CAACAAGGGCAAATACAAGG   |
| Chr01_8M-081 | CATCAACGCATATGTCCAAA    | ATGTGGTTGTGAGCATTCG    |
| Chr01_8M-082 | TGTTGGACTGCTGGAAGATT    | CGTTTGCCTTTGTCGTATTT   |
| Chr01_8M-083 | ATGGTTGAAGTTAGACCTGTCC  | GGCTCGGGCTTATGATATTT   |
| Chr01_8M-084 | GCTTCTCTGATTTTCGTCA     | CCCAAGTCTTCCCTCATGTA   |
| Chr01_8M-085 | CACACGAAGTCATCAATCCA    | TGGTGCTTTCTGGTATGGTT   |
| Chr01_8M-086 | TTCTCTCTTGTGCCTTGCTT    | AGTTGCTGCTCTGCTATGCT   |

|                |                        |                         |
|----------------|------------------------|-------------------------|
| Chr01_8M-087   | GCTTCGCCGAGTATTCTACA   | CCGCCTTATTAGATCCAACC    |
| Chr01_8M-088   | CGGAAGTTCAATCTTCGTTC   | ATGTATGTGTTTTCGAGGCGT   |
| Chr01_8M-089   | ACCGGATTACCCGAATTAAC   | ATTATCCAACCCAACCCAAT    |
| Gr01_9-13M_001 | GCCAAATTAGAACCAGCAAA   | AACCTAGGCCAGTTTGGAGT    |
| Gr01_9-13M_002 | GAACTTGCCTAATCCCATGA   | ATAATGGTGATGTCCATGCC    |
| Gr01_9-13M_003 | GGCCCAACTATTAACACCCA   | AGCATGAAAGAATGGGAATG    |
| Gr01_9-13M_004 | AAATTGCATGGAAGTGGC     | CCTGATATTGAAGGAACACGA   |
| Gr01_9-13M_005 | TAAGGATTTGGTCTGGTTGC   | ACTGCTGGATCGTATGGAAG    |
| Gr01_9-13M_006 | AGAGTGTGGCGTAGAACCCAG  | GCTTGTCAATTCAGAGGGAA    |
| Gr01_9-13M_007 | GGGTAGAAAAATCGTGCAAA   | GGCCTCTGAGAACAATGAGA    |
| Gr01_9-13M_008 | CATACAGCACCACATTTCCA   | GTGTTACTGTCCGCAATTTCC   |
| Gr01_9-13M_009 | TGGGTGTAGCTTACCCATGT   | GAATTTTGAAGACGGCATTG    |
| Gr01_9-13M_010 | TACGCACGAGGAAGGATTAG   | AGGTAGCGATCAAATGACGA    |
| Gr01_9-13M_011 | TCGAGTGTAATTTTGGGGAA   | CCTTTGATGGTAATTGTGCC    |
| Gr01_9-13M_012 | GCCTCTTCTATTTCTGCCT    | AAAGAGACCAACAGGCAATG    |
| Gr01_9-13M_013 | GGTGATCCCCTTTTTGTTTT   | GCAAAGAACCCTTCGATTTT    |
| Gr01_9-13M_014 | CTCTTTTTATTCCCTCCCA    | TGTGACGTTGACAAATACGG    |
| Gr01_9-13M_015 | CCTTGACAAGTGTTTCGTTGA  | GAGCCTAGGGACGAAATCAT    |
| Gr01_9-13M_016 | GAGAGCAGTGAGAGCGGTAG   | CCTCCATTGTTGTTTCTCTCT   |
| Gr01_9-13M_017 | TGATTTGGTGCAAAGTGGTA   | CGATTTGTTTATTGCCGTTT    |
| Gr01_9-13M_018 | CTTCCACTAAGCTTCTCTCTCG | GAGCACAATATGTTCAAGTGAGG |
| Gr01_9-13M_019 | GCCTCCCATCTTTATCCAAT   | AGCAAAGCAAACCTCGACAAT   |
| Gr01_9-13M_020 | GGGTTTGTATATTTGGGCCT   | AGCTGCAGTGGGTTAGAATG    |
| Gr01_9-13M_021 | AAAAGTTCTTTTCGGCCACT   | CGTGTAGAGGCCCAATTTAG    |
| Gr01_9-13M_022 | CATTCTTTGAAGAGGGACCA   | GACAGTTTTCCGAAGGGATT    |
| Gr01_9-13M_023 | TTCCTTTTCAACTTCAACGG   | GGGTGGATAAACCGATAAAG    |
| Gr01_9-13M_024 | GAATTTTGATCGCGGTAATC   | TAATGCTGCCAGCTGATTTT    |
| Gr01_9-13M_025 | GCCCTTTTAACATGAGTTTCC  | TTAGGGTCCCTCCAATTTT     |
| Gr01_9-13M_026 | TTCAAGCTCGGTTGATTTTC   | GTTGGGGTTCGTAAAGGATT    |
| Gr01_9-13M_027 | TGATGATGACGAATTTGCTG   | AAGCACTTGTTGGGATTTGA    |
| Gr01_9-13M_028 | TGCTGGCTAGACAAATCCTT   | ATCAAACATGGAGACATGGG    |
| Gr01_9-13M_029 | ACTTTGCAAGTTGATCCCTG   | GCCAGAATATTCCTCAATCG    |
| Gr01_9-13M_030 | ACTTTGCAAGTTGATCCCTG   | AATTTTTCCTACGTCCTCGG    |
| Gr01_9-13M_031 | TGCAAAGATTTTGGTCTGTG   | CCTAAGAGTCGGGCTGAAAT    |
| Gr01_9-13M_032 | GCTTAGCTTTTGCCTTTGAA   | GTTCTTCGGTGGTAGAGCAA    |
| Gr01_9-13M_033 | ACTTTCTCCACTCCACCTCC   | AGCGGAACCGAGAATAAAGT    |
| Gr01_9-13M_034 | CATCTGCCATTAACATGCAC   | CCACTCCTATTTCCCGTTTT    |
| Gr01_9-13M_035 | GATGGTTGCGAAATAAGCAT   | TACGAGGTGTTACCGGACAT    |
| Gr01_9-13M_036 | TACAATCGGTTTTTCATGGCT  | ACCCGAGCCCAATAACTAAC    |
| Gr01_9-13M_037 | CAGAATCTGACAATGGGACC   | ATTGTAAAGGAAGGGAGGGG    |
| Gr01_9-13M_038 | ATGGTCGGAGAGGATGTGTA   | GAGCTCTCGATTGCACTGAT    |
| Gr01_9-13M_039 | CCTTTTGTATCGAGCTTCCA   | ACCCACTGCAAAAACAAATA    |
| Gr01_9-13M_040 | CTCCAAAACCCAAATTTCT    | TGAGAAAGGGACTCAATCCA    |
| Gr01_9-13M_041 | GAACAATGGGCATGCTTAAC   | TGATCAAGTGATGATTGGGA    |



|                |                          |                        |
|----------------|--------------------------|------------------------|
| Gr01_9-13M_042 | CCCAAACACTAGACTCAGCC     | TACATCGGACCTTCGGAATA   |
| Gr01_9-13M_043 | TGGCTGAACATTGTAGCTGA     | CTCGGCCTCAGATCTTATCA   |
| Gr01_9-13M_044 | AGCCATTAAGGTTGTTAGTGGA   | TTCAAGCTTCCATGGCTAAG   |
| Gr01_9-13M_045 | GTACATATGGAATTCAGCCTCTCT | CGCGTTTGAATAGGTGTTTT   |
| Gr01_9-13M_046 | GCTAAGTGCCGTGAATCTGT     | TATGTCCACCTATGCCGAAT   |
| Gr01_9-13M_047 | TCCACTGGCCTAAAATGAAC     | CGATTTCCGATACCATTTTG   |
| Gr01_9-13M_048 | TCATCATCCTTTTTTGCAACC    | GCCCGACCCGAATATATAATAA |
| Gr01_9-13M_049 | ACCGGCCAATATAAAGGAAC     | AAAGAACTGAAGGGAGCGTT   |
| Gr01_9-13M_050 | AGGTTGGTGGAAGATGATGA     | GGCATCTCAAGAAAACCTCA   |
| Gr01_9-13M_051 | AGAATGGTTCTGCTAACTTCCA   | CAAGTTACCTTCGACGCAAT   |
| Gr01_9-13M_052 | TGGCCAAATACATCATCTCA     | ATTGCAACCCAACTGTTTGT   |
| Gr01_9-13M_053 | CTAATCAATGGAATGTGGGC     | GCATGGTGCTTGTTAGCTTT   |
| Gr01_9-13M_054 | GCGTGGCTTTCGTATATTGT     | CGTGTACATCATGCTGACATAA |
| Gr01_9-13M_055 | CCATACAATCAGTGGCGAAT     | TCCGCAAATGATAGAAGACC   |
| Gr01_9-13M_056 | ACAAGTGCACACAAAACCCT     | TGTTGATTAGTCCCCGAAGA   |
| Gr01_9-13M_057 | CCCTCACTCACATTGGAAAG     | AGGCAATGATGTTGTTGGAG   |
| Gr01_9-13M_058 | AAAAGCTTTAACCAGGGGAA     | CGAAGAAACCGAATGTGACT   |
| Gr01_9-13M_059 | GATCATTTCAGCGACCATT      | GTTGAATTGCAACCTTGGTC   |
| Gr01_9-13M_060 | TCCCAAGTGGCAATAGTTGT     | GTTGGGCTAGGTTTTGGATT   |
| Gr01_9-13M_061 | TTGTGGGTCCATTCAACTCT     | TCCCTTCTTATCGTTCTCCTT  |
| Gr01_9-13M_062 | TGGACGAGATCTACAATGGTG    | CGTTTGGTGGGAAAGAAATA   |
| Gr01_9-13M_063 | ACAAGTGCACACAAAACCCT     | GCCTGTCAGATTGAAGCCTA   |
| Gr01_9-13M_064 | GTTTGTTCACACTTTCTCGG     | GAAAATTAGGGTCCAAAAGAGG |
| Gr01_9-13M_065 | AAAATCTCTTCCTGGCCATT     | GTCGAACCAAGCCTATTGAA   |
| Gr01_9-13M_066 | GGTTTTTGGACAAGCATGAG     | GGGTTTGTATTAGTGGATGCTT |
| Gr01_9-13M_067 | TCAGGAGCTGAGTTGAGAAAA    | GAAAATTACAAAGGCTCCCC   |
| Gr01_9-13M_068 | GGTGTGAAAGCATCACCTTT     | GGCTTAGTTCAACCCATTG    |
| Gr01_9-13M_069 | ATGGCAACACATTCCGTA       | AAAGGGCTAAAACCGAGAGA   |
| Gr01_9-13M_070 | GAACTCCTCAATGCATGCTC     | ATGTCCTCCATTTTCTCCTC   |
| Gr01_9-13M_071 | TCCCTCTGTTTTTGCTCAAC     | TGCAATATAAGGGCATGGAT   |
| Gr01_9-13M_072 | CACATGATACTGGAAAGGG      | TGGGTTTTGCTTTAGAGTGC   |
| Gr01_9-13M_073 | AGGGAAATCCAGGAAGAATG     | TTGCATCCCAACATTAACCT   |
| Gr01_9-13M_074 | TATTTTTCCCCTTTCGAACC     | TTCCACTGTTTCGTCTTCCTC  |
| Gr01_9-13M_075 | AATTCAAACCCCTTTGGTC      | TGAATCTAGGAGAGCGTTGG   |
| Gr01_9-13M_076 | AGTTCGGTTCAGGGGAATAC     | CCTTTCGTTGCATTTTCATTC  |
| Gr01_9-13M_077 | TGTTTACTCCCTTTGGCTCA     | AAGGTTTCGGATTTGGAGTCT  |
| Gr01_9-13M_078 | AAAGCCTTAAAAAGACCCCC     | GAACGAAACAACCTGAGGCAT  |
| Gr01_9-13M_079 | ACAAAAGGGTTGAGTTTCCC     | TTGAGGTATTAAGCCCATGC   |
| Gr01_9-13M_080 | TAACCTTTGCTCCGGTTGTC     | GATTCGCCAACAAAATCAAC   |
| Gr01_9-13M_081 | TCGGGCCTATATTTTACCC      | TAGCTTAACGCCGGATTAGA   |
| Gr01_9-13M_082 | ACATCAAATATGCGGCCTAA     | GTTCTGGCTAATGGGGAAAT   |
| Gr01_9-13M_083 | ACAATGCTTCTTTGGTGCTC     | GGTGAAATCGGGTTCTTTTT   |
| Gr01_9-13M_084 | ATTAACCTTTTGGGCGAGTC     | TGATCTCCAAAGGAGCATGT   |
| Gr01_9-13M_085 | GCTTGTCTTTGCCAATTTGT     | TGTTGGAGACGAAGGGTTTA   |

|                |                         |                          |
|----------------|-------------------------|--------------------------|
| Gr01_9-13M_086 | GTGGGAATTAGGGGAGAAGA    | AACAGCATTTCGAAAACGAAG    |
| Gr01_9-13M_087 | TGCTCTTCTTTATCATGGGC    | GACCCAATGCAAAGGCTTAT     |
| Gr01_9-13M_088 | CCACAATAATCCATAGTACGAGA | GTGTAAGTTGCGGCTTCAAT     |
| Gr01_9-13M_089 | CAATGTCTTCATTTCCCGAG    | CGAAAATGAAGGGAAAGGAT     |
| Gr01_9-13M_090 | CCAAACAAAGAACATACCCG    | ACGGTAGTGGGCATGTTAAA     |
| Gr01_9-13M_091 | ACACGTGTCCAGATTTGGTT    | GCAGAGACTAGGGATTAAATCGT  |
| Gr01_9-13M_092 | AAACCCCTAGTGATTACCCG    | CCATCACCTTTCTTTTGTCTG    |
| Gr01_9-13M_093 | ATTTGTTCCCTTGGCCTTTTC   | GAAAGGGGACGAATTTGAA      |
| Gr01_9-13M_094 | AACAAGCCATTTTCGTATGG    | CGTCAGCAAAGTCAATCACA     |
| Gr01_9-13M_095 | AGTTTCGCACACTTAGTGCC    | GGTTTATCGCTATCCGAGGT     |
| Gr01_9-13M_096 | TGGGGGTTCTTCTTCTCTTT    | CGAATCTAGGGTTCGGTTTTT    |
| Gr01_9-13M_097 | TTAATTGTAATGCCTTCGGC    | CCATTCATGATTGCACATTG     |
| Gr01_9-13M_098 | AAGGTGACCTGATCACTGCT    | GGCGTTAATGCTCGGTAGTA     |
| Gr01_9-13M_099 | CATGACCAGTAATGCACCAA    | CTGACTCAGATAGACAGCTTTGAA |
| Gr01_9-13M_100 | GTCAAATTCGGTTATGGGA     | AGGGGGATTCTGAGTAGTGG     |
| Gr01_9-13M_101 | GTGTCAGACCTTGGGATGAG    | GCCCTTTTTAAGGTCTTTGC     |
| Gr01_9-13M_102 | TTGGCCCTCTTTTGTAATTG    | GGGTGAGGACAATGGTGATA     |
| Gr01_9-13M_103 | AGCCGAAATTCTATGGGAGT    | TGACCAAGGGTTTCACAGAT     |
| Gr01_9-13M_104 | TGATCTGAGGTCAAAGTCCC    | TGTGTTTCAACCCCTCCAGTT    |
| Gr01_9-13M_105 | CGTAGACTGAATGGTTGAAACTC | TGTTCAAGCCGACCTTTTAG     |
| Gr01_9-13M_106 | ATTCGTTGAGACTGCCTTTG    | TGCAACAACCTCCCACTTTT     |
| Gr01_9-13M_107 | GTGCCTAATCGAAACCAAGA    | AAAACAAGACATGCCGAAG      |
| Gr01_9-13M_108 | GTTTTCGCATGGAGAGGATA    | TAATTCCTCATTCCCAACA      |
| Gr01_9-13M_109 | GTGGGAATTAGGGGAGAAGA    | AATAGCGTGCAAAAACGAAG     |
| Gr01_9-13M_110 | TTCCATGAAGCTGATAGCC     | ACTTGGCATTATGGGTTGA      |
| Gr01_9-13M_111 | GGCCTCTTTTGTAATGGGT     | AAAGAGAGGCAGCTGTAGCA     |
| Gr01_9-13M_112 | GTGGGAATTAGGGGAGAAGA    | TACCGAACTAAGCGAGCAC      |
| Gr01_9-13M_113 | GCTGTGTCTTCTCGAACCAT    | CCACCCGAATAGGTGTTCTA     |
| Gr01_9-13M_114 | AGGCTTGTAATTTTTGGGCT    | CATTGTAGCAGGCCAATTTT     |
| Gr01_9-13M_115 | GTCTTGACTTAACCTCCCCC    | TCTTCCCCGTCCTTTTCTT      |
| Gr01_9-13M_116 | CCATCTATTCGTCGTCAACC    | GGCACAGCCTCGATAGTAGA     |
| Gr01_9-13M_117 | ATAACATTCACCCCCTTGGT    | CACTGTCAATCAACTCTGCG     |
| Gr01_9-13M_118 | GCTGCTTTTGAAGCTACTGC    | TGTCTCTGGTTCAAGTGCAA     |
| Gr01_9-13M_119 | TTTCATTTTCAAGGTGTCCC    | CTCAAAATTCGTAGGCCAAA     |
| Gr01_9-13M_120 | AGGTATAATGCATGGCACTTG   | GGTGTCATTCTTTAGAACCCA    |
| Gr01_9-13M_121 | TTCTTTCTTTGGCTCACACC    | CCGCCCCGTTATAAGTAAAT     |
| Gr01_9-13M_122 | CTGCTTTGACAAGGGAGAAA    | GGTTTAATTTTGCTGGGGTT     |
| Gr01_9-13M_123 | AACCCAGCAAATTAACC       | TGTTGTTCCCTCATTGCTTT     |
| Gr01_9-13M_124 | TAGAGGAGGTGGTGGTGGTA    | ACGAGGACCAGATACATGAAA    |
| Gr01_9-13M_125 | ATGGGAGTTTTTGCATGTA     | CCTCGGTATGCATTTACAACA    |
| Gr01_9-13M_126 | CCCCTTCATTTCTCCATCTT    | TTTACCATCGGATCTCTCCA     |
| Gr01_9-13M_127 | TCGACGAATGCAACTTCATA    | TCACTGCTTCATCATCCAAA     |
| Gr01_9-13M_128 | ACTTCTCGCAACGTTCTGTC    | GCCATTCTTGATACTCCCT      |
| Gr01_9-13M_129 | GGCCTAGTAAACGGGCTAAA    | CAAGCTTCCAAGCTCCATAA     |

|                |                            |                        |
|----------------|----------------------------|------------------------|
| Gr01_9-13M_130 | GGTTAGGGTTAGGGTTTTTGG      | CCCCGGGCATAGACATTA     |
| Gr01_9-13M_131 | TGCATGATGTTAACCCTTCA       | CAATTTAATTTTCGGTCCCCT  |
| Gr01_9-13M_132 | TGATCCCACAACACTACTAATGTGAC | TTGCTTTGGTTACACATCCTC  |
| Gr01_9-13M_133 | GGCCGATTTTCCTTAATTCT       | TAAGCTTTGGCACTGAGAGG   |
| Gr01_9-13M_134 | GAGTTGTTTTGTGCAGAGATGA     | TAAGAGGCCTGAAATGACCA   |
| Gr01_9-13M_135 | AACCGAATGCTATTAACCCC       | CGGTTCTAGAAGGAGGAACC   |
| Gr01_9-13M_136 | TGATTACTTCGAATAGCGCC       | CCACTTGTA AAACTTCGGACA |
| Gr01_9-13M_137 | CAAGAAACGAAGAAAACGGA       | ATTTGAGCTCATCCAAATGC   |
| Gr01_9-13M_138 | GATGAATCCACGAACGAATC       | TGCATGCATGTGATTTTACC   |
| Gr01_9-13M_139 | AGTCGAATTTAACGGGGAAC       | GCACCGTTCAAACACTCTCT   |
| Gr01_9-13M_140 | GACATCGGAACAATTCAACC       | GCCTCGCTAAAGACCAGATT   |
| Gr01_9-13M_141 | TCGAGCACACAAGTGAAAGA       | ACAATGCCGCTTATCTTCAG   |
| Gr01_9-13M_142 | GGATGATGTTTCTTTGGTTGC      | CTAAAATTTTGTCCAGGCC    |
| Gr01_9-13M_143 | TCTTCAATGTCCCTCGCTAC       | ACATTGCCCTTGA ACTGAAA  |
| Gr01_9-13M_144 | GTTTGTCAATAATTTGCCCG       | TGCCAAGGTGTCCTCATAAT   |
| Gr01_9-13M_145 | CTTCACAAAATTCCAACCA        | GTGGCACATCACACACAATAA  |
| Gr01_9-13M_146 | AATGAAGGATGCGTTTGAAG       | CAAAGGCAAAAAGCTCACAT   |
| Gr01_9-13M_147 | CACACCTCTGTTTGTGTTCCG      | AAAATCATAACCGAGCTCCC   |
| Gr01_9-13M_148 | GAATCTCTGTGGGAGCAAAA       | ATGGAAAAGTGGGGAAAAAC   |
| Gr01_9-13M_149 | GGTCTTGCTATCCTTCGTGA       | TCACTACCCATTGCTTCTC    |
| Gr01_9-13M_150 | GAGGGTTTTGGGGAGTAAAA       | CGAATCGAGTTGAGTTTTCG   |
| Gr01_9-13M_151 | AAAAGTGAGAGGGACAGAAGAA     | TCTTTTGATGTAGCTGAGCAAG |
| Gr01_9-13M_152 | TTTGCAGCCAAAATAAGGAG       | CCAGGAAATTTTCAGTTGTGG  |
| Gr01_9-13M_153 | CAGCAGA ACTCCTCTCTTGC      | AACCCATCAAGGTTTTAGGG   |
| Gr01_9-13M_154 | GGTTCCCTCCTAAACAGCTC       | AAAAGAGGGCAAAGTTTCGT   |
| Gr01_9-13M_155 | AAAGCCCACCATTAAGACC        | TGTTACTTGCTTGGCACTGA   |
| Gr01_9-13M_156 | CCCAAAGTAATTGCAGCAG        | CATGGTCATGAAAGCTAGGG   |
| Gr01_9-13M_157 | AGGATTTGAAGTGAATGGCA       | TTGCGTTCAATAGTGCTTGA   |
| Gr01_9-13M_158 | CAGCCCAATTTGAGTCAAAC       | GAGTCCATATTTGAGTGGGC   |
| Gr01_9-13M_159 | GCATGTCGATAGCTTCGTTT       | TTTAAGCTGTTGCTTCCCTG   |
| Gr01_9-13M_160 | TGAATTACCCGAATTAACCG       | AGGCCCACTATTCACCTAAAC  |
| Gr01_9-13M_161 | GCATGTCGATAGCTTCGTTT       | TTTAAGCTGTTGCTTCCCTG   |
| Gr01_9-13M_162 | GGCATAATGGTCAAGTTTGG       | GGTATTCATGTTTGACCCCA   |
| Gr01_9-13M_163 | TTATCTAACCGCTCCTGCAC       | ACCGGAATCAACGTCTCTTT   |
| Gr01_9-13M_164 | CGAATCGAGTTGATTTTTCG       | AAGGTTTTGAGGGTTTTTGG   |
| Gr01_9-13M_165 | CCTTTTTGGGTTTTTCACCTT      | CCGATGGAAGAAGAAGATCA   |
| Gr01_9-13M_166 | TGCTCAAAATCGTTGAGTGA       | TAAAATATCGGCAAACCCCT   |
| Gr01_9-13M_167 | AGCAACCTCCAAACTCCTTT       | GGCAAAAATATAGTCACTCCCA |
| Gr01_9-13M_168 | GTGAGTTTAGATTGGCGGTG       | TGGATTTGAACCTACGATGG   |
| Gr01_9-13M_169 | GCTTGCTCGAGAAAAAGAAG       | ATTGCAGGGCATAAATCAAG   |
| Gr01_9-13M_170 | TGTAACAGGTCCAGCTCCAT       | AATGGTCCCTTTTAACCGAG   |
| Gr01_9-13M_171 | CACAATGGAAAACGATCACA       | TTTACTAACTTTC CGTGCCG  |
| Gr01_9-13M_172 | CAATTTTAAACCGCACCAAC       | TAAGCTACAGGTGGAGTGGC   |
| Gr01_9-13M_173 | GGAGAGTGCAGGTAAGACCA       | TTCTCTTACATCGGAGGCAG   |

|                |                        |                        |
|----------------|------------------------|------------------------|
| Gr01_9-13M_174 | TCTCGAAGCTCAACGAGAGT   | TCACTTCGATCGTCTCCTTC   |
| Gr01_9-13M_175 | AATCCGACCTCTGAGCTCTT   | TCCGATTAGGGTCAAAACTG   |
| Gr01_9-13M_176 | GCCATGCAACAAGAAAAATG   | GGTTGGTCAGATTCAAGGAA   |
| Gr01_9-13M_177 | ACGACGTATTGGTCATCGTT   | AGAAGAAAGTGCCTGGCTTT   |
| Gr01_9-13M_178 | CCTAGCCCGACTCATTTTCT   | TCCTTTCTCTCTAAAAACAGCG |
| Gr01_9-13M_179 | TGGTACGTTTTGAGGTGAGAA  | GCATGCCATCTATATCCGAC   |
| Gr01_9-13M_180 | TCGAAGAAACCGATGAAAAG   | TGGCGTTTTTGGTTACAAGT   |
| Gr01_9-13M_181 | AAAACCGGGATATTACAGCC   | ACCACTTCCTCTTCCTCCAC   |
| Gr01_9-13M_182 | TGGTTGTAATTTGGCCTTACTC | CACCAGCCTTTTGAGCTTTA   |
| Gr01_9-13M_183 | ATGCAAGCTCACAAGTCACA   | GTTAAATGCCGAAATGGATG   |
| Gr01_9-13M_184 | CTTCCACGATCAATCAACC    | GCACTTGGGTTTTCTTTTGA   |
| Gr01_9-13M_185 | AATACAATGCCTCTTTCGCA   | GACTAAAACCATTAATGCCGAG |
| Gr01_9-13M_186 | AAGAACCACCTTTGTGCTTG   | AAAACCAGGCACCATTTGTA   |
| Gr01_9-13M_187 | CGTAATCTCCTTCCTCAGCA   | TTCTTAGCAATGTTGACCCC   |
| Gr01_9-13M_188 | GGGTCTGAAGATGAGAAGCA   | GTATTGCATTTGGAAGTGGG   |
| Gr01_9-13M_189 | CTACATCGACCACTGTTCCC   | TTGTATGGGGAATTGATTGG   |
| Gr01_9-13M_190 | GGCGAACTCTGTCTAGGTGA   | GGCTATAAAAAGCCATGCAA   |
| Gr01_9-13M_191 | TCTAGGTGAGCTTCCCCTTT   | GGCTATAAAAAGCCATGCAA   |
| Gr01_9-13M_192 | TTTGGAGGTTTTTGGCAGTAG  | ATACCAGTCCCCTAAGCCC    |
| Gr01_9-13M_193 | TCATTTTGTCTAACCGCTCC   | GAATCGACGTCTCTCTTTGC   |
| Gr01_9-13M_194 | CTTTAGCAGCGTTTTTGCTC   | ATGTCTTCGTGGTCGTTGAT   |
| Gr01_9-13M_195 | TACATTCATGATCAACGCCA   | ATCGAAGAACATGACCCAAA   |
| Gr01_9-13M_196 | TATGTCTGAAGATGCTACCCC  | TCAGCAGTAGGCCAAGTCTC   |
| Gr01_9-13M_197 | AACTTCATGCAACTACCCCA   | CCAAAAACCTTTCTCCACCT   |
| Gr01_9-13M_198 | CCCAACATAGCGATGAAATC   | AATAACAACAGCCCAACAGC   |
| Gr01_9-13M_199 | ACTTCCGAAACCCATACTCC   | GAACCAAAGAGACCTCCCAT   |
| Gr01_9-13M_200 | CCCAGCCCGTTTTCTAAATA   | GGCCTCAGGCACTACTTTTT   |
| Gr01_9-13M_201 | TCCAGCTCAGGTTTATTTGC   | CAAAGACCAAAGGAAATGGA   |
| Gr01_9-13M_202 | AAAAGTTTTGAGGGCTTTGG   | TTTACTCCTTCCCCTTCCC    |
| Gr01_9-13M_203 | AAATTTGCTAGGCCCATTTGT  | CCTAGGGTTTTCTGCTGCT    |
| Gr01_9-13M_204 | AATTCGTGCTGATGTTAGAGGT | GGAGCAAAGAATTGAACAGC   |
| Gr01_9-13M_205 | CCACAACAATCAGCAATCAA   | ATTTTCTCTCCCTGCTCGT    |
| Gr01_9-13M_206 | ATACAACGCGTCCAGACTTT   | ATCTTATGACACAAGGGGCA   |
| Gr01_9-13M_207 | ATTGTCAAGCATGACTGGCT   | TGTCTTCTCTTCCCCTGACA   |
| Gr01_9-13M_208 | GTGATTGATACCAAAGGCGA   | ACTTGTTTGTATCAGGGGCA   |
| Gr01_9-13M_209 | ATTATGGGAAATCCCTGCTC   | TGGTATTGGAAAGGTTGCAT   |
| Gr01_9-13M_210 | ATGGTTTTGGTCGTTGAGAA   | ACCACCTTGGCCACTTAGTT   |
| Gr01_9-13M_211 | CCCCCTTGAAAAGAAAACCTC  | TAGTGGACTTGTGACGTGGA   |
| Gr01_9-13M_212 | CCGACATATTGATTTGGACG   | CCACTTAGTTCACCGAGGAG   |
| Gr01_9-13M_213 | TTTCCTCAAGTCGAAAGTGG   | GCGTAGCTTAAAATGCCAAA   |
| Gr01_9-13M_214 | AGTCCCCTCAACAGTCATCA   | TAAAACGGATGAGGGTAACG   |
| Gr01_9-13M_215 | GTGTCTGGGTGCAAAGTTTC   | GCCATGAGATAAGGATTGGA   |
| Gr01_9-13M_216 | TGCTGGGAGAGATATCCAAA   | CATGAGCCATAGTTGAACCC   |
| Gr01_9-13M_217 | GCAAACACGAGTTTAGCGAT   | TGTCCAAAGACCCTGAACAT   |



|                |                         |                       |
|----------------|-------------------------|-----------------------|
| Gr01_9-13M_218 | ACATAAGGGTCACCTGCAAA    | GGGGGTGCAAATAGAGAGAT  |
| Gr01_9-13M_219 | GGAAATTCGGTCAAAGGTCT    | CATCGAAACCCTCTGATACG  |
| Gr01_9-13M_220 | AAAACCAACCCAATAACCCT    | ATGAGAAAATCGACCCAACC  |
| Gr01_9-13M_221 | CACGCAAAGAACAGTAGCAA    | AGGAGTCTCCGATTACACCC  |
| Gr01_9-13M_222 | CATTTGACCTTCCTCCTTCC    | AACTTGAGTTTCGCAAGTGG  |
| Gr01_9-13M_223 | TTTCGGTATTCTTTTGCAG     | CTTGCCTCATTGCTCTCATT  |
| Gr01_9-13M_224 | GGTGAGAGAGCCACAAAAAC    | AATTTTAGGATGCACGGTGA  |
| Gr01_9-13M_225 | TCCAGGTGAAATCGTACCTC    | GAGGGAAAGGGGATGTCTTA  |
| Gr01_9-13M_226 | TCAATCATTGCAACGTCAAG    | ACCTCCTTTGGCATTAAACC  |
| Gr01_9-13M_227 | TGGTTTAACGGGAAGATTGA    | AGCGTCACAACACGTACAAA  |
| Gr01_9-13M_228 | CGTCCCCGTATAATGAACTG    | GGAGAAGAGAAGGAGATCGG  |
| Gr01_9-13M_229 | AATATTGACGTGGTGGGAGA    | GCTAACGTGGCCGAATAATA  |
| Gr01_9-13M_230 | AGGATTCATTAGCTCGGCTC    | GCATCGGTAACCTTGAGGTTG |
| Gr01_9-13M_231 | TCATACAAAAAGCTGCCCTC    | GGGATTACGTGAGAATGGTG  |
| Gr01_9-13M_232 | TATTTTGACCCAATCCCTCA    | TTGGTGCAAGTGTGCTTAAA  |
| Gr01_9-13M_233 | GAACCGCATGTAGTGAGACC    | GCCTTCTCTCGTTGTGTTTG  |
| Gr01_9-13M_234 | TGTGGAAGGCTTTATCTGGA    | TGGCCTCTCCTTTTTCTTTT  |
| Gr01_9-13M_235 | TTGACTGGACCTTCTTTTGC    | AATAGATGTAGAGTGCGGCG  |
| Gr01_9-13M_236 | AAATTGCTAAGCTCGAACCC    | GGGTAAAAATATAGGCCCGA  |
| Gr01_9-13M_237 | TCGAATTGAGTCGAGTGAGA    | ATTACGATGGGTGACAGTGG  |
| Gr01_9-13M_238 | GGCTCGTTTTTGGCTTAAAT    | TAGGGTGATGAATTCGGGTA  |
| Gr01_9-13M_239 | GGGAGTGAATTAGGGGAGAA    | GAAAGAATGGTTTAGGGGGA  |
| Gr01_9-13M_240 | TGACACACCAGATACGGTCA    | GTTTGCTTCGAAATGGAGAA  |
| Gr01_9-13M_241 | GAGCGAAGTACTGAGGTGGA    | GTACCTCAGATGGATCGTGC  |
| Gr01_9-13M_242 | TCATCTGGCTGAAACCCTAC    | TTTGCAGAAAATGGGTTCTC  |
| Gr01_9-13M_243 | ACAAACATGAGGGGACAAGA    | GATAGGCGCCAATGAATAAA  |
| Gr01_9-13M_244 | AAACCCAAGGACAAATGATG    | ATGAGACCCGATCAACTGAA  |
| Gr01_9-13M_245 | CCATAATTTTAGGTGTTGAGCG  | ATTCTGGAATTCAGTGGCTG  |
| Gr01_9-13M_246 | AGGTTTTCAACCCCTTGTTT    | ACAAACACGCAAAGCAGTG   |
| Gr01_9-13M_247 | TGGTACAGGTTAAGTAGATGCCT | GTAAAGTGGACTGGTGGGTG  |
| Gr01_9-13M_248 | GTTTAGGCCTTTTGGCTTTC    | TGGAAAGTAAGTCAACCCCA  |
| Gr01_9-13M_249 | TTATCAACCACATCTGCCG     | GCTCGAATCTTTGTGTCTGG  |
| Gr01_9-13M_250 | GGAATTTACAACCTTGGGCA    | GTGACATGGCAGTTGACAGA  |
| Gr01_9-13M_251 | TCCATCCCTCCACTTTACAA    | AGCAAAATAACCCTGGAACC  |
| Gr01_9-13M_252 | GTTTGCAACAAATAGGCACC    | CAGCAGTTGTGGATGTTGAG  |
| Gr01_9-13M_253 | ACTGATTCGGCACTTTGTGT    | TAACCTGACTCGGACTTGGC  |
| Gr01_9-13M_254 | CCGGTCTTTCTTGCTAAACA    | AACCATCCTTCTCCTTGTCC  |
| Gr01_9-13M_255 | GGTTCATGAAGCATGTCTGA    | CCCAGATTTGTTTGCATTCT  |
| Gr01_9-13M_256 | CAACCACCACCTCAAAACTC    | TCTTCAATGGCTTTGGAGTC  |
| Gr01_9-13M_257 | TCTCATCCAACATCCGTTTT    | TCAGCTTGAACAACACTCCA  |
| Gr01_9-13M_258 | AGAGCCAACCCTAGGAAGAA    | TCCAGCCTTCTCTCGTTATG  |
| Gr01_9-13M_259 | CCTTATGTGGGAGGCCTTAT    | AACTCAAATCCCCTTTGGTC  |
| Gr01_9-13M_260 | CGGTCTGACCCGACTATTTT    | CAGCAGCAAAGAAAGAGGA   |
| Gr01_9-13M_261 | ATGGAAAATGGATGCCTGTA    | GCCATATACATGACCAAGCC  |

|                |                        |                          |
|----------------|------------------------|--------------------------|
| Gr01_9-13M_262 | TGTTTTGTTGAAAGGGAAGC   | AATGAAGCTCAAGCAACCAG     |
| Gr01_9-13M_263 | CCCGATCTGGATAGTTTGAA   | CTGAAATGGATCAAATTGGC     |
| Gr01_9-13M_264 | CCGGAGATTTAGACCAGGTT   | CCTAGTGGACTCTCCACCT      |
| Gr01_9-13M_265 | CAATGCATGTTGTTGTCCAC   | CGTGC ACTCAACAAATTAC     |
| Gr01_9-13M_266 | GCAGTTACAGGCTAGGTGGA   | AAACTTGTTACAGGTTGGG      |
| Gr01_9-13M_267 | ACAGTGGACCTGAAAGCAAA   | TGGTTGAACCGGAAATTAGA     |
| Gr01_9-13M_268 | CATGTGGCAACATCTCAGAA   | TTGACCCCTCAACTTATCCA     |
| Gr01_9-13M_269 | GGACGAGTTCATAACCATTGC  | AGATCATTGAGCGGTTTGAG     |
| Gr01_9-13M_270 | GAAGATGATGGGTTGTTTGG   | AGATCATGAAGGGCAAATG      |
| Gr01_9-13M_271 | ATTCGAAGCAACGATCTCAA   | TATCATGTTTATCTTGCCGA     |
| Gr01_9-13M_272 | TTCGTCACAGACGTCACAAC   | TGTGTTTAACTTGGCTGGGT     |
| Gr01_9-13M_273 | CTGATACTTGTCACCACAG    | ATTGTTGGTGTGCATGACTG     |
| Gr01_9-13M_274 | CCAAACCCTAATCTGTCATGC  | ACGGGTAAGTTGTTGCATTT     |
| Gr01_9-13M_275 | GGTGGAAATTGAGATAAGCCA  | TTCCTTGATCGAGTTCATCG     |
| Gr01_9-13M_276 | AGGGTTCCTGCTCACTTTCT   | GAAAGGGTTGGGTTGTTTTT     |
| Gr01_9-13M_277 | TGGGTGGATTGGGTTAAGTA   | TCATTTATTTTCGGGTATGGG    |
| Gr01_9-13M_278 | TTACCTCGAGACTTGCTCGT   | ATTTTTCGAGCCTAGGGATG     |
| Gr01_9-13M_279 | AAAAGTACGGGGTATTTGCC   | ATACACGGATTCCAACCAA      |
| Gr01_9-13M_280 | AATAGGCTCACGCTGAACG    | AACATGTCTCGCTCAAAGG      |
| Gr01_9-13M_281 | CGAATCGAGTCGAGTGAAT    | GGGTGACAGTGGTTACAAG      |
| Gr01_9-13M_282 | AAGGTTTTGAGGGTTTTTGG   | TACTCCTTCCCCTTTTCCC      |
| Gr01_9-13M_283 | CTTCGAAAATCCCCAACTT    | AGTATGGGCCACTCGTATT      |
| Gr01_9-13M_284 | ATTATTTTTGGGCTGTTGGG   | CACAATTGGGCTTTTCAGTC     |
| Gr01_9-13M_285 | GACACATTTCCCTATGGCTG   | ACATTTGAGAGTCGAGCCAG     |
| Gr01_9-13M_286 | AATCTCCCCAATTCCTTC     | CCTTCTCTTTCTTTCTCCTTTCTC |
| Gr01_9-13M_287 | CCCGTGTCTTCTCCTTCTTT   | AGGGTGAAATGACAGACCCT     |
| Gr01_9-13M_288 | CATTTACAGTGGGATATCGT   | CAACGTGAGGAAATTTAGGG     |
| Gr01_9-13M_289 | GGTATAAGATGGTTCGGTTGG  | TACTTAAAACGCATCCCAGC     |
| Gr01_9-13M_290 | GTTCCGTTGGTTAATATGCG   | TACTTAAAACGCATCCCAGC     |
| Gr01_9-13M_291 | TATGAGCATGCTTTTCCAGC   | TGCCTCGTCATCTTGTTGTA     |
| Gr01_9-13M_292 | AGTTTAATGACATTGGGCGT   | GGAAGTTGGAGAAGCACAGA     |
| Gr01_9-13M_293 | ATCATAGACCGCCACATCAT   | CGGAGAAATTCGAAAACAGA     |
| Gr01_9-13M_294 | CACAAGCAGATTTTCAGGCT   | GGGATGAAGTGAACCATTTG     |
| Gr01_9-13M_295 | CAAATGGTTCCTTCATCCC    | CTACATGTTCCCACCCAAAC     |
| Gr01_9-13M_296 | CTGAAATTCTCGTAATGTCGGT | ACCAAGGTAACATGCAATCC     |
| Gr01_9-13M_297 | TGGCTTTCTCCTTCTTTCT    | GCCATTGTTCTTTAATGAGGC    |
| Gr01_9-13M_298 | GGGAAACTGCAAAACGATAA   | AGAATGGGGACCTTTTGTTT     |
| Gr01_9-13M_299 | GGGTGATTTGACAAAATGC    | GTAGAGGAAGCCCAAAGGAG     |
| Gr01_9-13M_300 | AAGGCCAAAATTTGTATCCC   | AACAACTGACCAAACCCA       |
| Gr01_9-13M_301 | GGAGGCAACCCAATTTTTAT   | CATTGCTCAACGGTTTTTCTT    |
| Gr01_9-13M_302 | GCGTGTGTAATAATGACCC    | ATGGAGGAATCACACTCAGG     |
| Gr01_9-13M_303 | CGTGGCATGTAAATCATCA    | AGAGATGGAGAAGGGAGGAA     |
| Gr01_9-13M_304 | AGATGGACCGTACAAGGTGA   | CCCTTCTTAAAATCCCAGA      |
| Gr01_9-13M_305 | TGCCAGCTGAATCCTCTTAT   | GGCAAATAAAAATCAGAGCCA    |

|                |                        |                          |
|----------------|------------------------|--------------------------|
| Gr01_9-13M_306 | TCCAAGTAAATAGCATGAGTCG | GTTCCAAGATTATCAACGGTGT   |
| Gr01_9-13M_307 | ATGCAAGAGAACAGACTGCC   | TTCCCTAATCCCAATTCCCTC    |
| Gr01_9-13M_308 | GTTGGCAGGAAATGTTGAAT   | CCAAGTCCCTATACATGCCA     |
| Gr01_9-13M_309 | GTTGAGGCGGCATAAGTAGA   | GCTTGAAGCTCAAAAACCCT     |
| Gr01_9-13M_310 | AAGAAGAAGGCTCGGATGAT   | CGTACAACAACAACCCACA      |
| Gr01_9-13M_311 | CATATTACCGCCTTCCATTG   | CTCGCCATGTTTTTCAGAGAT    |
| Gr01_9-13M_312 | CCTATGCTGCTATGCCTTGT   | ACTGGCACTGACTTGCTAGG     |
| Gr01_9-13M_313 | GAAGTTGGGTCAAATCATCG   | TCGTAGGCGTACTCTTCCAC     |
| Gr01_9-13M_314 | TTGCTCAGTTTAGGTCCTGC   | TAAACTTGGAACCCACCAA      |
| Gr01_9-13M_315 | CCACATGTCATACTGTGTTGC  | AAAAGCAATTAAGCCCCTACTC   |
| Gr01_9-13M_316 | CCGAATTAACCATATTACCCG  | TCACCTAAACCCAATCCAAA     |
| Gr01_9-13M_317 | CTGGGATTGTCAGCGTAGTT   | GCATGAAACCATTTCATGTCA    |
| Gr01_9-13M_318 | CACAGTCGGTTCGTTAGCTT   | TTAAAACCATGGAGGGATTG     |
| Gr01_9-13M_319 | CAGGCTAAGTGCTGGTGAAT   | CTAATCCACATGTGCCGAAT     |
| Gr01_9-13M_320 | GGGCAAATATTGATCTTCTCAC | TGCATTGCAATCATAACCAG     |
| Gr01_9-13M_321 | CCGCCATTGAAGAACACTAT   | GACATGTGAAAGATGAAGTGA    |
| Gr01_9-13M_322 | CCAAAAATTTGTCGCAAGTC   | CGCAATGCTACCGATATTCT     |
| Gr01_9-13M_323 | TTACTCCTTCCCCTTTCCC    | GAGGGTTTTGGGGAGTAAAA     |
| Gr01_9-13M_324 | TGTCACTTTACGAGCTTAGGG  | CCATTACTTTGTTCTTTCCCC    |
| Gr01_9-13M_325 | GATAGAGCTCACAAAGCCGA   | TCGCTACTAAAATGGCTTGC     |
| Gr01_9-13M_326 | GGGAATAAACCCCTTAACAGA  | GATTGATTCCCACCATTCAA     |
| Gr01_9-13M_327 | AATGGTCCAATCCAATTCCT   | GCTCCCGTTTCAACTAAACA     |
| Gr01_9-13M_328 | GGCTTAATCGCGTAAAATGA   | TTAGTTTCGGCCAAAAGATG     |
| Gr01_9-13M_329 | GGCCAAAATGATTACTAGACCA | AATGGGGGTAAATGGAGAAG     |
| Gr01_9-13M_330 | AGGCTGGAATCTCCATAAG    | GACAAAATCTCAGGCCCATA     |
| Gr01_9-13M_331 | GTTGATGGTGGCAGTTTTTC   | AGGAAGAGTTTAGAGAGAGCTCAA |
| Gr01_9-13M_332 | TGAACCAATCATACCTAACCG  | TGTACCAACAACAGGAGAATGA   |
| Gr01_9-13M_333 | CCCCTTGGACAATAGGTTG    | AAAAGACGGGAAACATCCTT     |
| Gr01_9-13M_334 | CCACCTTCCCTTTTTACACA   | CCCTCTTGATAGGTAAGGGTG    |
| Gr01_9-13M_335 | CATGCCATATACCAAGCCTAA  | CATTGCGTCTTATTGAAGGC     |
| Gr01_9-13M_336 | TCTGAGAAGTTGAGCAACCC   | TGCCTAAGCTGGAGTAATGG     |
| Gr01_9-13M_337 | CACATTGGTTGAGGCTTTTT   | ATCAGGTAGCATTGTTGCTGC    |
| Gr01_9-13M_338 | GACGGTCATGATAGGGTTTCT  | TGACTAAAACGCCGGTAAAG     |
| Gr01_9-13M_339 | TGTTAAGAGGACATTCGAAGC  | CGTCTGTAACCCCTAAAGCA     |
| Gr01_9-13M_340 | CCCTTCGTTTTCTTTTAGGG   | AAACATGTCCAACAGCATGA     |
| Gr01_9-13M_341 | CATGCAGTACAAACCGAACA   | CATGCGAAAATGGCTTACTT     |
| Gr01_9-13M_342 | CGTGATCGAAGCTATCTGGT   | TCACTTGTGTGAAATGGACTG    |
| Gr01_9-13M_343 | AACACCTGCAAAAACAGAGC   | CCCCTTCTTTTCTTTTTCG      |
| Gr01_9-13M_344 | ACGCATTACTCCGTTCTAGC   | ATGACGATTGTTGATGCCTT     |
| Gr01_9-13M_345 | AAATGAAGCGTACCATAGCG   | AGTTTTACATCCGGGTCCTC     |
| Gr01_9-13M_346 | GGATGGCAGTTTAAGGGTTT   | TTTCTCTGCTTTGACAACC      |
| Gr01_9-13M_347 | GAGACCCATGGATGACTCAG   | CATGGCAGAGAGAAACAGGT     |
| Gr01_9-13M_348 | GCGTAAACACTGGGAAAGGT   | CGGCTATAAAAGCCATGAAA     |
| Gr01_9-13M_349 | GACAAGACTACCACATGCC    | TTGATCGGAAGGGATAACAA     |

|                |                        |                         |
|----------------|------------------------|-------------------------|
| Gr01_9-13M_350 | CGATCCTTTGTGAACCATGA   | TCTAGATCTCTGCAAACGGC    |
| Gr01_9-13M_351 | CATGAAAAGCCTGGAAGAGA   | CATTGGATCCTTCACCAAAG    |
| Gr01_9-13M_352 | TCATGTCCGAAAGGAGACAT   | CAGGCCATTAAGAAAGCAA     |
| Gr01_9-13M_353 | GCAGTAAAGGCGTCATGATT   | TTCCAACATCTAGTGTGCCA    |
| Gr01_9-13M_354 | GGAGGAGAGGATGGAGGTTA   | AATCAAAGCCTCTCCCACTT    |
| Gr01_9-13M_355 | ATCCCTGTCAAGGTGTCAA    | CAACATCAGTCACCAACCAA    |
| Gr01_9-13M_356 | TTAACTTGACTCGGACTCGG   | AAGAGTACGGGGTATTTGCC    |
| Gr01_9-13M_357 | GGCTGATGGCAAGTAGAAGA   | AAATGTCTCACCGTTTCAA     |
| Gr01_9-13M_358 | AGCAAAGAGAGGCAGCTGTA   | AAAGGATTTGGGCTATTTGG    |
| Gr01_9-13M_359 | TGTAGCAGCGTCACTCATGT   | CAGCCAAGAAGCAATTAGGA    |
| Gr01_9-13M_360 | CTGAAGTCGGTCTTGCATCT   | TCACATGCATTAGACACCGT    |
| Gr01_9-13M_361 | CTGAAGTCGGTCTTGCATCT   | TCACATGCATTAGACACCGT    |
| Gr01_9-13M_362 | CTTGAAATCGGCCTTTTGT    | ACCCACTAAACCTAGCCCAC    |
| Gr01_9-13M_363 | TCGGTCTTTTATAGCCGAAA   | CCCTAGGAGCCTATTTGCTT    |
| Gr01_9-13M_364 | AAGGCGTTTTGGAACATACA   | GAACCAACATTGCAACACAA    |
| Gr01_9-13M_365 | ACTTTGGCACCTTTGGTGT    | GGATGCCTTTGCTTTGTTTA    |
| Gr01_9-13M_366 | AGATGGTTGAAGTGTTCGCT   | ATCCCTATCCCAATTTTCCA    |
| Gr01_9-13M_367 | TTAGGTTTCATTGCAACGGT   | CCAAGTCTGACATTGTTGA     |
| Gr01_9-13M_368 | AGATTTGGAACGAGGGAAAT   | TCAGCATTCTTGTTGTTTGC    |
| Gr01_9-13M_369 | CTTCCGTTAACCATTTTACACC | TCAAGAGGGTCAACTTCGAG    |
| Gr01_9-13M_370 | CGATCTTAAGACAGGGGTTG   | TTGGTCATAAGTGGTACCTAAGC |
| Gr01_9-13M_371 | GGGTAAAAATATAGGCCCGA   | GAAAAATTCCTAAGCCCGAG    |
| Gr01_9-13M_372 | TTAAGTGCAACCAATCAGCA   | TTGGGATGCTTGAAGTTTGT    |
| Gr01_9-13M_373 | GGTCTTGCATCTCCTTCTGA   | CGTCTCTTTTCGCATTCATT    |
| Gr01_9-13M_374 | AAGTGAGGCTTTATTTAGGGCT | TCCCAACATGATTCCTTCAT    |
| Gr01_9-13M_375 | TGTAGCCAAAGACGATGACA   | GCTTGAGTTGCTTCGACAAT    |
| Gr01_9-13M_376 | AATTTTAGCATAGTGTACGGGC | TGCGTTAAGGGTTTTACAGAC   |
| Gr01_9-13M_377 | GTTCCCTTTTCTACGGTGGT   | AACAGAATTGAGCCGAAGTG    |
| Gr01_9-13M_378 | GAAATTCGACCAAGGGTCTT   | CCCAATCAAGAAATCCACAC    |
| Gr01_9-13M_379 | TGTAGTCCGTCTCTGCCTC    | TTGTATCTGCAGCCCTCATT    |
| Gr01_9-13M_380 | AGATACTGCGCTGGCTAAGA   | CATTTAGCCCACCAACTGAG    |
| Gr01_9-13M_381 | CCTAAGGAAGCAAGAGGACC   | TTCTTCACCACCTCACCCT     |

---

**Supplemental Table S5. 126 pairs of primers based on the 3'UTR and 5'UTR sequence of genes**

| Primer       | Forward primer (5'-3')   | Reverse primer (5'-3') |
|--------------|--------------------------|------------------------|
| G077500.1-3' | TCGATTACACCCCTAAACCA     | GGTTGCTCATGGTTGACATT   |
| G077500.2-5' | AGAATTGGGGGAAAGGAAC      | TCGTTGACAAGGTGTTTTACTC |
| G077600.1-5' | AGAGAAGTGGGAAAGGAGGA     | ATCTCATAAGCAGCGAGTGG   |
| G077600.3-3' | GGTTAATCGACCATCATCCA     | GGAATTGCATTGGCTGTAAC   |
| G077800.4-3' | GCCTTCATGTTGAAGAGGAC     | AACCACCGACTAACTGACCA   |
| G077900.1-5' | CAGACTTTGCTTTTGTATGTGTG  | AATCAAAGAAAGGGGGAAGA   |
| G078000.1-3' | CTTGAATTCCAGCTTTCAGC     | TCTTACCCTCCAGAAAATCAAC |
| G078000.5-5' | GCAAAGACACATCCCTTCA      | AAAAGCATCACTTGGATGGA   |
| G078100.1-5' | TGCAGAAACGTAAATGCAGA     | TTTCAAATTTCTGGCTCTCG   |
| G078100.5-3' | AACCTGCGTTTGACACTCAT     | ATTCCATGCGCACATAACTT   |
| G078200.1-3' | GAAGCATTTCATTGCACCA      | CGCCACAAAAGGACATAGAT   |
| G078200.1-5' | TTCCTAGGGTTAGGGTTCGT     | TGAGACCAAAGTACTGAGG    |
| G078300.1-5' | ATCAAAGCATGCATGAGAGA     | CAACAAAATGCCATGACAAG   |
| G078400.1-3' | TGCAAAATATCAGGGCTACG     | GAAAAACGATCAGACGGAGA   |
| G078400.1-5' | GATGCCCGTTCTCTCTCTCT     | AGATGGAAAGGGATCGTAGC   |
| G078500.2-5' | GCTGCAGATTGAAACAAAAC     | GCCATGTTAGCTCTGCAACT   |
| G078600.1-3' | GAAAAACAATATGCGGTTGC     | GCCTTCAGGGCCTTAGAATA   |
| G078600.1-5' | CCGGGATGTAGAGATGAAGT     | TGGGTTTCTACTCTCCCGTA   |
| G078700.1-3' | CCATTTTCGGCAATTACAAG     | GATCAACCCTCCTCTTCCTG   |
| G078700.1-5' | ATGCCATATCTTCAAACACG     | GCTTATCCAATCTCCACTAACC |
| G078800.1-5' | TTGGGGTTATGCATTGACTT     | AGTGAGTCCGGTGAGTGAAG   |
| G078800.2-3' | CATTTCGATGCTACACAGCAC    | CGACATAACAGACACCACCA   |
| G078900.1-3' | GAGCTATGGGCGTCAGTAGA     | GCCAAACTTAATGGCAGATG   |
| G078900.1-5' | CACGTCTTCCCCTATTGTTG     | AATGAGAGGTCCCTCGTTTCC  |
| G079000.1-3' | TTTCGTTCTTCCTTTTCTGG     | GGGGTATGGATCAAGCTTTT   |
| G079000.1-5' | ATGCAAACGTAGCCTCAACT     | AAAAACACCCCAATGAGTC    |
| G079100.1-5' | CGGCCCTTAGTCAAGAAGAT     | GAATGCGAAGAGAAATTCCA   |
| G079300.1-5' | AAATTCCCCACCAAGAAAAC     | CGCCTTTGCTTGCTAATCTA   |
| G079300.2-3' | TGTTTGCCTGGCTTAGTAGC     | CACCAAGACAGATGATGTGC   |
| G079700.3-3' | TGGTTCTGGTTTAGGGATTG     | TGCCAACACTCATGATCCTA   |
| G079700.3-5' | CGATGAATCAAAAACCTTAGGC   | CAGCGAAACCCTAGTTAAAGC  |
| G079800.1-5' | AGAACGGACGGCTTAAATCT     | TGCTTTGGGTTCTGCTCTTA   |
| G079800.3-3' | GGAGAGAATGGGCTGTTGTA     | ACATGCAGAGAAACATGCAA   |
| G079900.1-3' | CGTAGTGGGTTTTGGTTTTG     | CAGCAATGAACCAACATTCA   |
| G079900.1-5' | ATTGGACCACCCTCTCTTTC     | GATCGACGACTTTTTTCGTTG  |
| G080000.1-5' | TGCCTAGTTCTCTTTTCTTCTCTC | CTGCTTCCCGCTACTACAAG   |
| G080000.2-3' | AAGTCAGCTGCAAGAAAAGG     | ATGGCTTCCAGGTCATTGTA   |
| G080100.1-3' | CGTGAACACTGAGAGAGCTG     | TCCCTCCTTTTTTGAAGAAC   |
| G080100.3-5' | ATCCAGGAGATGAAGCAGTG     | CCATGGAGCAATCTTCTTGTA  |
| G080200.1-3' | TGCAAATACTTTGTGCATGG     | GGACAACGATGGACTTTGAG   |
| G080200.1-5' | ATTGACTCGGTAAGCCCAAG     | GAATTTTCTGCTGGGAAATG   |

|              |                        |                       |
|--------------|------------------------|-----------------------|
| G080300.5-3' | ATGCCTTCATGTCTTTTCCA   | GTTGCAACCTCTGAATGCTC  |
| G080900.1-5' | TTTGTCTTTTGTCTCCGAAC   | AGTGGGTGCTGAGAAGAGAA  |
| G081000.1-3' | AATTCATGGAACCTGCTTTG   | CCAGGATAGCAGTCACCAAC  |
| G081000.1-5' | TGAGAATAATAGCAGGCAGCA  | CATGTCAGGGGAAGATTTTG  |
| G081100.5-3' | GCATTGGGTAAGTCACCATC   | TGCTCGTCTACTCATGTCCA  |
| G081100.8-5' | CTCCATTGCTGCTCTCTCTC   | TTCACCAAAGCAAGGGAATA  |
| G081200.6-3' | TTGCCTTCTTCGTCACTAGG   | TACAACACATGTCTGGACTGC |
| G081200.7-5' | GGGGAAGAGGGTACCATAGA   | CCCCCTTGTTATTTGTCTTG  |
| G081600.1-3' | AATGCGACTGCTTAATTTGG   | CTACCAAATTGGGACGAAAA  |
| G081600.1-5' | TGATGGTGACATAAGCGAAA   | TAGGGCCAGTCTTGAAAATG  |
| G081700.1-5' | TTGCTGAGAAGAAAGGGTTG   | TTGCTGTAAATGATGGGTCA  |
| G081800.1-3' | AGAACCATTTGCCATCTCCT   | ATTTCCAGGGGATTAATGGA  |
| G081800.3-5' | GAAATGGGTATCCTCGGAAG   | GGAGAACATAAGGGGTCCAT  |
| G081900.1-3' | GCGACCTTCCATTTTCATTA   | AACATGATGTCCCCTTACCA  |
| G081900.1-5' | TTTTTATCCCGCTACAAGGT   | CTGGGCTTTCAGCAGTTAAA  |
| G082000.1-3' | TCCACCATTCCCCTCTATTA   | ATTCGGTTCGATTATGCTTCA |
| G082000.1-5' | GGACAGTTGAAATGAAACGAC  | TGTATGACCTGAAGCAAGCA  |
| G082100.1-5' | ACCACGCCTTTTTGTGTTT    | GGGTTTGAATTGAGGAAGAAG |
| G082200.1-3' | TGTGATTGCTGCTTAATGCT   | GCTTGAGATCATTGGGAAAC  |
| G082200.1-5' | TTCCCCTTAACTTCCAATCC   | GGCGGAAATAAAGGAAAGTT  |
| G082300.4-3' | GAATTGTGGAGCAAGTGGAC   | TAAGAGGGCAGCAAGTTTTG  |
| G082300.5-5' | CAATTCAGGAAAGGAGCAA    | ACCTGGGTGTTGAATGGTTA  |
| G082400.1-3' | CAACATTGAACATCGACAGC   | TTCGCATCACTTTCTTGACA  |
| G082400.1-5' | TTTGGGTCGATGAACATAGG   | TGTCGCCAAAAATGGTACT   |
| G082500.4-5' | GGTGTGTTGATTTGCAGGTTT  | TACCCGAGATATCGAAGCAG  |
| G082500.5-3' | GATCATGTGGTTTCCGTCAT   | AATGGATGCTGCAAGGAATA  |
| G082600.1-3' | TTAGGACCACGTAGCACCTT   | TTTTTGGCCTACTTGTCTAGG |
| G082600.1-5' | TGTTTTGCCTTTAACGAAGG   | GTTTGGTTTTTGGATTGTCG  |
| G082700.2-3' | CAAAGCAAAGGCCTAATCA    | TGAGGGTGGTGCTAGAAATC  |
| G082700.2-5' | CTTTCGCTCTCTGAAACTGC   | CGGCCACTAACACCTCTAAC  |
| G082800.1-3' | CCCAACATAACCATCCCTCT   | AGGCTACCCAACACCTCATT  |
| G082800.2-5' | CTTTTGCAGTACGTCGGTTT   | CTTTTCTTTACCGCGCTCTT  |
| G082900.1-3' | CTCGGGGTAAACAGAACCTT   | GTTGATGCACAATGGGTACA  |
| G083100.1-5' | CAATTTTCGTTGGTTTCGGTTA | TTTGAATGAGATCGGAAACC  |
| G083100.2-3' | ATGGTCTTCCCTGTTCACAA   | GCAAAGTTTTTGTGGCATC   |
| G083200.1-5' | GTTGTACGGTTGCTTTCAGG   | GCAGATCTCGGTATTTACAG  |
| G083300.1-3' | CATGGTTGACATGGTCTTCA   | AGGGTAGAATTGGCGACTTT  |
| G083300.1-5' | CCAATTGCCATTTAGTCTT    | CACAACCCTAACGCTTTTTG  |
| G083400.2-3' | AACCTGAAGCTCATTGCTG    | TCAACACTGATCTGCAATGG  |
| G083700.3-3' | GCACTGCAGGTACCAAGTTC   | GTTGATGAGTGTGCCTGTGA  |
| G083700.6-5' | CACAAATTTACCACAACGA    | GGTCACTGTGATGTCAACCA  |
| G083800.1-3' | TGCAATGTGGCAAATACTGT   | TCAACCCTACTACGCAAATCA |
| G083800.1-5' | GCAAACCAAAGATCCAGAAA   | TTTGTCTCGCTTCGCTTAGT  |
| G083900.2-5' | CTTGGGGTGAGGGAATAAAT   | CGTGTCGGTGCAAATACTAA  |



|              |                        |                        |
|--------------|------------------------|------------------------|
| G084000.1-3' | TGCATCGTCTCTTAGTTATGGA | TCCGTATTCTTCACTCACCTC  |
| G084000.1-5' | CGGCTATGTGCTCTGCTTAT   | AACAACCAACCGATCTTCAG   |
| G084100.1-5' | CTTTCATACCACGCCAAAAC   | TTTTGTCTCCTCCCACAAGA   |
| G084200.1-3' | TGGAGAGTCTAACCCTCAACA  | AAATTGCCATCGTGTGTGTCT  |
| G084200.1-5' | TGGCAACTTTCCTTTTCTTG   | ATACTCGGCGAAGCGTATAA   |
| G084400.1-3' | TTGCTCACAAATCACAATGC   | TTGCAAGTTGCGAGCTTT     |
| G084600.1-3' | GCTAGGTCTTTGGGATTGGT   | TTTTGTTCCAGCAAAAGGAG   |
| G084700.1-5' | GGATTTTGAGGAGGCTAGGT   | TGCAGCAAAAACCATCAGT    |
| G084900.1-5' | TGCTGTTGCTGTTGTTTTGT   | TTCAAAGACACGTGGTTGTC   |
| G085000.2-3' | TGGAAGGAGCAAACAGTTCT   | TGGAAATGTGGTGCTGTATG   |
| G085300.3-3' | AGAGGGGCATATCCAATAGC   | TGAAAGAGTTCGTGGCTACC   |
| G085500.1-3' | CTCCAATTACCAACGACCAC   | AGGTGGGATTCTTGCACATA   |
| G085600.2-5' | GAGAGGAACTGCAGCCATTA   | TTGAATCTTTCAGCGAGTT    |
| G085600.3-3' | TCCAAATCCAAAAACACCAC   | TGTGGAAAAACAGGTGAAAG   |
| G085900.1-3' | TCGTGTGTTCCAGCTTCATA   | GGTTTGAAAAACCAACATGG   |
| G086100.1-3' | GCTTAAGCTTTTAGGGTTACCA | ACACTGTTCGTCAAAAATCCA  |
| G086300.1-3' | AAATACACAACCGTCGCTTT   | TTGCAGCAAGAATCAGTTCA   |
| G086400.1-3' | AATCAAGCCGAGGTATAGGG   | AGGTTTTGTTGTGCAGGTGT   |
| G086400.1-5' | CATTGCCTTAAACACATTGG   | CCAGCTCAGTCCTTTTCTCA   |
| G086600.1-3' | GCATTTTCAGCCCCAATACTA  | CCAACCATTTGGAAGAAGTG   |
| G087000.1-5' | GAAGGATGGGTTAGCAACAA   | CAAATGAAGAACAGCCGAAG   |
| G087000.3-3' | CAACAGCATCATCGTATGGA   | AGAAGCCGTAGACACCACTG   |
| G087100.1-3' | TAACTTAGAGGCGCAAATGG   | CCTACATATGGATGGCGAGA   |
| G087400.1-5' | GCCTGCTAGCTAGGTGTGTT   | GGAATGGTAGCTGCAATCAA   |
| G087600.3-3' | TTTCCCATTTCCCTGAGTAT   | TGTAGTGCAAGAATGGCTCA   |
| G087800.1-3' | GACCGTACAACAAGCTGCTAA  | TGCCTCCTATAAGTGTGCGAA  |
| G087800.1-5' | AGGCGAAAGAGATGTCTCAA   | TAACGAAATTACCGGGTCTG   |
| G088000.1-5' | GCAAAGTGTGTAATGGAGGGTA | CCACATTTCCCTTTGTCCTA   |
| G088100.1-3' | AAAAGTGCAGTGACTGGAG    | TGAAAACCCTTCAAACACC    |
| G088100.1-5' | ACCATCCTGGTTATCCCATT   | GGCTGAAAATGAGGAATTTG   |
| G088300.1-3' | AGATGGTCGAGGTGATCAGA   | GGGCAACATGTACAGTTCTTTT |
| G088300.1-5' | TTCCGAGACCAGTTATCCAA   | AATGGGAGCTGAAGAGTGTG   |
| G088500.3-3' | GGGTATTTGTTGTTGCCAAG   | AGGGAGCAAGCAGAACTTTT   |
| G088600.2-3' | AGACCAGGACTTCGGTCAA    | AACTTTGCATGGTGCTTGTT   |
| G088600.2-5' | TGCTTTTGCTATTTGCACCT   | TTGGCAAAGTGATGAAAGAG   |
| G088700.2-5' | CAACTTCGCCATCAAAGAC    | TCAAAGGGTGTTTCATTGGT   |
| G088700.5-3' | TTCCGAGTGTCCACATAGA    | CTAATTGCAGGCAAGTGATG   |
| G088800.1-3' | CCTCGTGCATAACTGACTCC   | TGGCTCTATCACTGTTGTGCG  |
| G089100.1-5' | TAGCTAACCGTCCGAAGTTG   | AATCTTGTGACAGCCTCACC   |
| G089200.1-3' | CGGAGTTCCGATTTTTCAGT   | CTCTTGACCAAGGGTTACCA   |
| G089300.4-3' | TCTTCACCCCGTTGATAAAA   | GCATGCAAATGAGATCAAAG   |

---

**Supplemental Table S6. 80 pairs of SSR primers on D07**

| Primer         | Forward primer (5'-3')   | Reverse primer (5'-3')    |
|----------------|--------------------------|---------------------------|
| Gh_D07_8-9M_01 | AGTATATTATCGGGCCTCCG     | GATTTTTCCATCTATTGCCG      |
| Gh_D07_8-9M_02 | GAGAACCTTGGTCTCAGCAG     | CGCTAGCGCTATCAAGTTGT      |
| Gh_D07_8-9M_03 | TCCTTGGCTTAAGAACATGC     | AGGTGAAGTTGGGTTGAGTAAA    |
| Gh_D07_8-9M_04 | GCCCCACTTTGAGGTAGTTT     | AGTCAACCCCATCTTGACA       |
| Gh_D07_8-9M_05 | TTTCGGGAGCATAGACAAAG     | CCATTTGTAAGACTGTCGGC      |
| Gh_D07_8-9M_06 | AAAGAGGAAAGGGAAACTGTG    | GCATTTACGTTTCTGCAGGT      |
| Gh_D07_8-9M_07 | CCTTGTTGTTCTTGAGCGTT     | ATTAAGGGGATCCAGCAAAC      |
| Gh_D07_8-9M_08 | GGTCATATTGCACAGTTAGTCCT  | GCCCATACAGTTTCGTATGC      |
| Gh_D07_8-9M_09 | TTTGAAATCAACCCCTGGTA     | AGCCTAGTGGCATCATCATC      |
| Gh_D07_8-9M_10 | GGGTTACGAAGCATTACCAG     | GTTTTTAATTGCAGGGGGTT      |
| Gh_D07_8-9M_11 | GCGGATACACAGATTC AAC     | AAAAGTACGGGGTATTTGCC      |
| Gh_D07_8-9M_12 | TGTACACCATCAACACCATAACA  | TGGTGAAAAGATGGTACAAGTG    |
| Gh_D07_8-9M_13 | GTCACAAAAGGCCATGGTT      | TGCTCCAATTACTTTCCA ACTC   |
| Gh_D07_8-9M_14 | CAAAGTGGAGATTACGGTGG     | CATGTGACACCTTGGGATTT      |
| Gh_D07_8-9M_15 | GGGCTTGAGCAA AATTCTAGT   | CATTGGACAACCACAGGAGT      |
| Gh_D07_8-9M_16 | GTTAACAAGCCACGTTGGAC     | GCCGAGAAAATCAACAGAGA      |
| Gh_D07_8-9M_17 | CCTTTTCTTCAAGTTGGGT      | TCTCCAAACA ACTCACCCTC     |
| Gh_D07_8-9M_18 | AAGGGAAGACAAGGTTGAGG     | CCTTCCA ACTTAAAACAGCTACTC |
| Gh_D07_8-9M_19 | GTAACATTGGGTCACCCTGA     | TCATGGGGAAATGAGGTAGA      |
| Gh_D07_8-9M_20 | AAGTTTGCTCATGAAGTGCC     | TTCATGTTACTGGCCCTTGT      |
| Gh_D07_8-9M_21 | AAAAACCACGGGTAGAGGAG     | GAATTAAGTGACCCGAATCCT     |
| Gh_D07_8-9M_22 | TCGACTCACTTTGAATTGTCC    | GTGAGAAAAGGAGAGCCACA      |
| Gh_D07_8-9M_23 | CAGCACAACAAATTTGGGA      | AAATCTAGGAAAGGGAAAGCC     |
| Gh_D07_8-9M_24 | AAATTTGCAGGGGGTTTTAC     | TGTAACACCCTCTAACCCCA      |
| Gh_D07_8-9M_25 | TGTGTGTGTGTATGAGGAGTGA   | AATTGGATCTCTGGATCCCT      |
| Gh_D07_8-9M_26 | ACTAAGGAAATCCAATGGGC     | TGACAAATCTAAGGGCTTGC      |
| Gh_D07_8-9M_27 | TTTCCCAACACACCAGTTTT     | GACACATTTCCAAACGCAAT      |
| Gh_D07_8-9M_28 | GAGTTGTCTGTCATGGCTCC     | CATTTCCCAA ACTATGCACC     |
| Gh_D07_8-9M_29 | GGAGAAAGTGGGATTTTGATG    | TTCAACATCCATGACACAGC      |
| Gh_D07_8-9M_30 | CCGATATCTAAACAATCCGGT    | CCTAATGCTCCTTCTCCCTC      |
| Gh_D07_8-9M_31 | TTCACCATCATA CACCCTC     | CCTAATGCTCCTTCTCCCTC      |
| Gh_D07_8-9M_32 | CAAGGTCAACTCCTCCACAC     | ACAATGGAGCAGGAAAATGA      |
| Gh_D07_8-9M_33 | GGGTTACATTTTTTCATTTGGTGC | CAAACATGAGGGGACAAGAC      |
| Gh_D07_8-9M_34 | TCTTGTCCCCTCATGTTTGT     | TCATCTGGCTGAAACCCTAC      |
| Gh_D07_8-9M_35 | CAAAGCAGGAAGGGTCCTAT     | TCTACTCCACGAAGTCGCTC      |
| Gh_D07_8-9M_36 | AGTGAAGATTGGTGGCATGT     | CGTGAGCCAAATTAACAACA      |
| Gh_D07_8-9M_37 | AATTGGGCTTACCTAATCC      | TTGCTCATGTGTGCATGG        |
| Gh_D07_8-9M_38 | TGGCAATCCACCTCTACTTC     | AATGTTAGCATGGAAGCCTG      |
| Gh_D07_8-9M_39 | GGACCAAATTCACA ACTTTAC   | ATCATGAGCGTTGATTCGTT      |
| Gh_D07_8-9M_40 | TTTAGGCTCTGCCATTGTTC     | AATTATCATGCAGGAACCCA      |
| Gh_D07_8-9M_41 | AGAGCAGCCTCATTCATTTG     | TGGGGAAGAGAAAAGGGTAG      |
| Gh_D07_8-9M_42 | CTGGACTCAGTTTCTGCCAT     | ATGCTTGAGATCATTGGGAA      |

|                |                          |                        |
|----------------|--------------------------|------------------------|
| Gh_D07_8-9M_43 | AAGTCACAAAAGCCGAGATG     | GAGGAGCTGCAATTGTTATGA  |
| Gh_D07_8-9M_44 | GAAATCACAAACATTCCAGGG    | TCTTAGAGGTGCTAATGGGC   |
| Gh_D07_8-9M_45 | TGTCTCCTCTCTGCCAGAAT     | AACTTGCAGCAAACAAAAGC   |
| Gh_D07_8-9M_46 | CTCCACACCAAAGACTGCT      | CACTAACATTTGTGGATTTGGG |
| Gh_D07_8-9M_47 | TGGTGGAGGTATGTCGTTTT     | ACATGCCACGTAGACAACAA   |
| Gh_D07_8-9M_48 | GCATCAATTTACCTGTCAAC     | TCATAAGCAATCATCCTCTTCC |
| Gh_D07_8-9M_49 | GTCTATTTCCGGTCTGGGTT     | GTAGGCCTATTTTGGCCAGG   |
| Gh_D07_8-9M_50 | TTCGTAAGCTTTCTTGTGGG     | CAGGGAGCGTAGATGAGAAA   |
| Gh_D07_8-9M_51 | ACAACCTAAAGCAGATGCGG     | GCGTTTACCTGCGGTTAGTA   |
| Gh_D07_8-9M_52 | CTGATTTGGAAGAAAACGG      | AAGATGAATGGACCTAGCCC   |
| Gh_D07_8-9M_53 | CGAGGGTGAATCTGGAAAT      | ATGCTGTTGTGGTGGAGATT   |
| Gh_D07_8-9M_54 | TATGTTACATCAACGCACA      | ATGTGGTTGTGAGCATTTCG   |
| Gh_D07_8-9M_55 | CACACGAAGTCATCAATCCA     | CACTTCGGTGTCTCTGATT    |
| Gh_D07_8-9M_56 | CGGAAATTCAATCTTCGTTT     | CCAAATCTGGCATGAAATGT   |
| Gh_D07_8-9M_57 | CAGGAAAGTGAAATACCCGA     | GTTTTCTTGCTGAGCCAAAG   |
| Gh_D07_8-9M_58 | AGAATTACCCGAATTACCCG     | ATTATCCAACCCAACCCAAT   |
| Gh_D07_8-9M_59 | GTTTTAGGGGAAAAGTGGGA     | CCAAACTCCCAAACCTTTTT   |
| Gh_D07_8-9M_60 | CCAAAAGACCTTTCGCATAC     | AAAACCACCTTTGGTCACAA   |
| Gh_D07_8-9M_61 | CATACAGCACCACATTTCCA     | CTCGAGGCAGCTAGTCGTAG   |
| Gh_D07_8-9M_62 | CCTACTCCTGTCTTCCACA      | GCGGTATAACCCAAAATTCC   |
| Gh_D07_8-9M_63 | TGAGTTTGGGAGTCGGTTAC     | AGGTAGCGATCAAATGACGA   |
| Gh_D07_8-9M_64 | TCGAGTGTAATTTTGGGGAA     | CCTTTGATGGTAATTGTGCC   |
| Gh_D07_8-9M_65 | CTTGGCACTTGTTTAAGCGT     | CGAGCTCCTGAAAATGATGT   |
| Gh_D07_8-9M_66 | TGAAGAACCAGCTCAAGGAG     | TAAATGAAAAGATGAGGCGG   |
| Gh_D07_8-9M_67 | AATACCAAAGAGTCGTGGCA     | TCCTAAACGTACTCCTTGCCT  |
| Gh_D07_8-9M_68 | CCTTGACAAGTGTTTCGTTGA    | GCCTAGGGACAAAATCATCA   |
| Gh_D07_8-9M_69 | AAAACACCACCACCGATTTA     | GGATGATGTGGAAAAACAGG   |
| Gh_D07_8-9M_70 | GTAGCGGAAGTGGTAGTGGA     | CCTCCATTGTTGTTTCTCTCTT |
| Gh_D07_8-9M_71 | TTGGACCTAGATTTGCCTGA     | TGGATGATTTGAAGAAGGGA   |
| Gh_D07_8-9M_72 | TACCCATTAGGGCAAAGTG      | GCCCTCTGAATATGCTTCAA   |
| Gh_D07_8-9M_73 | TCGCAAGTTACTCGACTTCA     | CGTGTTCAAATGGTAGAGGG   |
| Gh_D07_8-9M_74 | AGCCATTAAGGTTGTTAGTGGA   | TCCCGGAAACATAGAAATCA   |
| Gh_D07_8-9M_75 | ACCGGCCAATATAAAGGAAC     | AAGAGCGAAACATTCCTGG    |
| Gh_D07_8-9M_76 | ATTGTAGGTTGGCACCAAAA     | GAGCATCAACATTAAGACCCA  |
| Gh_D07_8-9M_77 | ACAAGTGCACACAAAACCCT     | TAGATCAAGAACCGGACCAA   |
| Gh_D07_8-9M_78 | TGTGCATAGTATAGGGTCAAGACT | TCTAAGGGCTTTTCGTTGGT   |
| Gh_D07_8-9M_79 | ACTCACGTTGGAAAGATGGA     | AGGCAATGATGTTGTTGGAG   |
| Gh_D07_8-9M_80 | AAACCGACGGTCAAGATACA     | TTTGGCCTACGAGAACTGAC   |

---

**Supplemental Table S7. The markers involved in gene mapping**

| Primer         | Forward primer (5'-3') | Reverse primer (5'-3') |
|----------------|------------------------|------------------------|
| Chr01_8M-004   | TCCCAAGAACAAAAACGAGT   | G TTCATTTGTTTGTGCGTGA  |
| Gr01_9-13M_056 | ACAAGTGCACACAAAACCCT   | TGTTGATTAGTCCCCGAAGA   |
| Gr01_9-13M_061 | TTGTGGGTCCATTCAACTCT   | TCCCTTCTTATCGTTCTCCTT  |
| Gr01_9-13M_064 | GTTTGTTCACACTTTCTCGG   | GAAAATTAGGGTCCAAAAGAGG |
| Gr01_9-13M_079 | ACAAAAGGGTTGAGTTTCCC   | TTGAGGTATTAAGCCCATGC   |
| Gr01_9-13M_110 | TTTCCATGAAGCTGATAGCC   | ACTTGGCATTATATGGGTTGA  |
| Gr01_9-13M_245 | CCATAATTTTAGGTGTTGAGCG | ATTCTGGAATTCAGTGGCTG   |
| Gr01_9-13M_263 | CCCGATCTGGATAGTTTGAA   | CTGAAATGGATCAAATTGGC   |
| Gh_D07_8-9M_77 | ACAAGTGCACACAAAACCCT   | TAGATCAAGAACCGGACCAA   |
| G089200.1-3'   | CGGAGTTCCGATTTTTTCAGT  | CTCTTGACCAAGGGTTACCA   |
| MON_DC40065    | TGAAGCAAATGCTCTTCC     | AGCCGGTGATCTTAGTGC     |

**Supplemental Table S8. RT-PCR primers for candidate genes**

| Primer             | Forward primer (5'-3')     | Reverse primer (5'-3')     |
|--------------------|----------------------------|----------------------------|
| <i>Gh_D07G0690</i> | GAAGATGGAGCAGGTGAAAGC      | TCTGGGTTGCACCAAGATTTT      |
| <i>Gh_D07G0691</i> | CATTTTCGCATCATGGACAGG      | AACTGACCAGCAAGTACCGTGA     |
| <i>Gh_D07G0692</i> | TGTGGCATGACCGACCTATCT      | AGCCGCACTCCTAAACTACCTC     |
| <i>Gh_D07G0693</i> | GGTCTTGAACTTTCGGATACTG     | AATGCATACATTCTTGCGATATTA   |
| <i>Gh_D07G0694</i> | GGCAAAACAAAAGTCTGAATGG     | GCATATTTCTGGGATTGTCGTAAC   |
| <i>Gh_D07G0695</i> | GTAGCGACGGAGGAGTTAGTGTA    | ATTTGTTATCTTTGTAAGTTCGGTTT |
| <i>Gh_D07G0696</i> | ATCGCAGGTGGAGCAAGAG        | CGAAAGATTGAACCTTGGACAA     |
| <i>Gh_D07G0697</i> | TTCTTCTGGGACCTTGGCTAG      | TGAAGTCCTCGCCATTCTCTAC     |
| <i>Gh_D07G0698</i> | TCTCTTCTCTCTATTGCACCTT     | ACTGCTGGCTGTCTCTGTCGT      |
| <i>Gh_D07G0699</i> | TTGGGAACATCAGTTATGCCTAC    | TAAAAACATGGTAATGCTGCGG     |
| <i>Gh_D07G0700</i> | ATCAAGAATGCTCGCAAATACC     | TATTGGACAACGAGTGTTAGGCT    |
| <i>Gh_D07G0701</i> | GGCTCCCAACTGATGAGAACTT     | AAACAACATTTATACCCTACCCCAA  |
| <i>Gh_D07G0702</i> | ATGCCCTTTGAGCAAGTTAC       | ACTGACGCCCATAGCTCGTG       |
| <i>Gh_D07G0703</i> | CCGCTTTGACATTGGCTTTA       | GCATAGTTGAGGCTACGTTTGC     |
| <i>Gh_D07G0704</i> | CCTCTTCTGATGGACGCTT        | AACCGCTCTGGATCTTGTGG       |
| <i>Gh_D07G0705</i> | TTGTTGTTTGCCTGGCTTAGTA     | TTACACAGCTCACTACCAGTCACC   |
| <i>Gh_D07G0706</i> | AAGAAGTTTCAAAGGCAGGCTAA    | TAAGAGTGAGTCAACGCTTTTCC    |
| <i>Gh_D07G0707</i> | CCAGCAATACTTCTCAGATTCTTACG | CCACCAGGCACTACGATAACAATA   |
| <i>Gh_D07G0709</i> | AACCGATGGCATAACGCAA        | TCCCTAAACCAGAACCAGGCT      |
| <i>Gh_D07G0710</i> | CACAATAGGGAGAGAATGGGC      | AATCCGTCTGTACCTTCTAACC     |
| <i>Gh_D07G0711</i> | GGGGAACAAGGGAGGCTAAG       | GCTGCTGCCTTTTTTTCTAACA     |
| <i>Gh_D07G0712</i> | TGTTTCTGCCATTTGCTTAGTG     | GATGCTTACGGGCTGACGAT       |
| <i>Gh_D07G0713</i> | TTAGTGGTCGTGCTTTCTGGA      | GCCATTGGTTGAATTGCATACT     |
| <i>Gh_D07G0714</i> | TCTTCTGTTTTCCCTCGTTTTAGC   | CCTCAGGCTTTTGTGGGCA        |
| <i>Gh_D07G0715</i> | TTGCCCTCACAAATCACCTAT      | TTTTATTCTCATCGCTACAACATCC  |
| <i>Gh_D07G0716</i> | GGAGCAAGATGAAGCAAAGGC      | AGCACAGGAAATGGGAATGAGC     |
| <i>Gh_D07G0717</i> | TTATTGATGTCTGAGACGCATAGAC  | AATCTTCTCCCTGTTACCTCCG     |

|                    |                           |                             |
|--------------------|---------------------------|-----------------------------|
| <i>Gh_D07G0718</i> | TCTGGATGGTATTCCTGTTGGG    | GGTTCCTGTTCCCTTTGCTG        |
| <i>Gh_D07G0719</i> | AGAAAGGGGAAATGAAAGGCT     | CGCTGGACAAACAGGCAAA         |
| <i>Gh_D07G0720</i> | TCATTTGAAGGATTTGTGGAGTCT  | TGGATGTGACGAACCGTAGTGTA     |
| <i>Gh_D07G0721</i> | TCTCCTTTCTATGTTTGCCCACT   | TTGCCACCTGTTGTCTCATCC       |
| <i>Gh_D07G0722</i> | TGGGGTTTTCAAAGGAGTAGTAGC  | TGTGTTTAGGGTTATTGGGCGA      |
| <i>Gh_D07G0723</i> | CTTGCTCTGAATCCGACGACTT    | GCTACCGTGCTTCTGAAAACCTG     |
| <i>Gh_D07G0724</i> | TGGATGCTTGGAACCCTACG      | TACTGTTGCTCCCCCTACCC        |
| <i>Gh_D07G0725</i> | GCACCAAAAAAAGAAAGCATCC    | AATAGCATCATTCAAAAACAAAATCAT |
| <i>Gh_D07G0726</i> | TTTTCAAACGGTATTGTCAGCC    | CAGCCAGGTATAGTCTGTATTTGTATG |
| <i>Gh_D07G0727</i> | GGAGTTCGTGATTCAAGCCTATG   | GGCTGATTTTCTTCCCTGATGTGTAT  |
| <i>Gh_D07G0728</i> | CAAGGTGGATTTCGGAACCTGTAT  | ACTTCTAACTGTTTCAGGTTTATCTGG |
| <i>Gh_D07G0729</i> | ATTTTGATTGTTGTGCTGGGTG    | TCTATTTTCTGCTCCTTTCCAGTG    |
| <i>Gh_D07G0730</i> | ATGTGACGAGCCAAATCGAG      | CCAAGTAAAACATGATGTCCCC      |
| <i>Gh_D07G0731</i> | CAGCACCCCTGAATAATGGAC     | GTGGACTCTTGCACCTCGGATC      |
| <i>Gh_D07G0732</i> | GAGAAACAAACCACAACCTCAAGGA | GAGGAGGGTAAAAAAGGGAAA       |
| <i>Gh_D07G0733</i> | CTTTGGTTTTGCTCCTCTGACT    | GCAATCACAGAAGAAAATGGCAG     |
| <i>Gh_D07G0734</i> | TGGCATCCATTTGGAGGAA       | ATGAGAAGACCAGGGCAGACA       |
| <i>Gh_D07G0735</i> | GGCGAAGATCGGGAGGACT       | AGACTCAATTCAAGGGTTGTAGGA    |
| <i>Gh_D07G0736</i> | CTCTTGCCAAGGATGCTTCG      | AAATGACACCAAACGCTGCC        |
| <i>Gh_D07G0737</i> | TATGTGGCACAAACCATGACG     | TCTAATAACCAAGCAATCTCCCG     |
| <i>Gh_D07G0738</i> | GCAATGATAATAGCAGGTCTGAGA  | GTTCCGTCCCAAATAAAGGC        |
| <i>Gh_D07G0739</i> | GCACAATCTCGGGCAGTTC       | CATTGACTCCCCCTGACCA         |
| <i>Gh_D07G0740</i> | GCCACCAGGAACTGCACAAA      | ACCCCGAGACAGGCTAACTAAAA     |
| <i>Gh_D07G0741</i> | TGTGAGTAGGAAGTTGGATGGTC   | AAATCGGGACCCAACACAA         |
| <i>Gh_D07G0742</i> | AAGGCATAGCGATTACAGCGT     | TGGGATGACTTGATGGGGAC        |
| <i>Gh_D07G0743</i> | TCTTCGTGTCAGTTCTCATCAGCA  | GCCTCGAATTGCTTTCCTTCA       |
| <i>Gh_D07G0744</i> | GTCACGACTTCAAAGGTAGCTGC   | GGGTATTTTTTTGGGGGGC         |
| <i>Gh_D07G0745</i> | TTTCCTCCTTCGTCAACCG       | CACTAAGACCGTATCACCCCTGC     |
| <i>Gh_D07G0746</i> | TGGGCTATCTATGTCTGGTGTGCG  | AAGTCCATCCTCATTCCCTTCTATCAT |
| <i>Gh_D07G0747</i> | AGCCTATAGATCGATGCTTCACTC  | TCTTCGGCACACAGAAAACC        |
| <i>Gh_D07G0748</i> | TGCTTCTGCTAGAAATGAGCCT    | TTGGATGCCCTTCTCGACT         |
| <i>Gh_D07G0749</i> | TGCTGGGCTCGTAGTGGCT       | GGTTCGCAATCTGAATCTCTCC      |
| <i>Gh_D07G0750</i> | GAAAAAGTGGCGGATTTGAAC     | TGGCAATGGTCAGCGTAGG         |
| <i>Gh_D07G0751</i> | CGAAACCCTAAACGGACAAGC     | CGAGAAACTGATAGCCAATGCC      |
| <i>Gh_D07G0752</i> | TAGTTGAGGAGCCTATTCGTGC    | CCTCCAACACATTTTTTCACCAT     |
| <i>Gh_D07G0753</i> | CGCTAAAAAGGGCTTCGTATT     | ACCTCATGTGGATGTTTCAGGG      |
| <i>Gh_D07G0754</i> | AATACAATCAAGGACCGAGAAACAC | CAGAGCCACTTGGGAGACAGAC      |
| <i>Gh_D07G0755</i> | AAGGAGAGAATAGAGGTGGTGAAG  | GAAAAAAGGCAAAGGAAAAGAGT     |
| <i>Gh_D07G0756</i> | TGATTGGCTTCAAAGTGCAGA     | GGCAACCAGACCAAATCCTT        |
| <i>Gh_D07G0757</i> | AACGCCTAACGAAATCTAAACCTG  | CTCTCTCACACAAACACACGCAC     |
| <i>Gh_D07G0759</i> | ATGGGTGTGGATACTCCGTGT     | CAAAAGAACCTGTTGCCCG         |
| <i>Gh_D07G0760</i> | TGCGACTCGTAAGATTAGAGATGA  | AGTTGTGGGAAGACAGGAGTAGG     |
| <i>Gh_D07G0761</i> | GTGATAATGACAGCGTTCGGG     | AATACTCCAATGGCGGCTCC        |
| <i>Gh_D07G0762</i> | AAGTTTCGGTATTGCTATGGTGGT  | TGTCATTTCTACTACGATAAGCCTG   |

|                    |                         |                            |
|--------------------|-------------------------|----------------------------|
| <i>Gh_D07G0763</i> | ATACTGGCATTGTTGTGGCTCT  | TTATCGGAGTGGTCTGGTTGTC     |
| <i>Gh_D07G0764</i> | GGATGATGTGGAAAAACAGGTG  | AATGAGGTCTTTCCTTACAGGCA    |
| <i>Gh_D07G0765</i> | TGCTCCCTTCAACTTTCACA    | GCAGATCGAAGTAGATACAGACCG   |
| <i>Gh_D07G0766</i> | TGCGTTTCTCTTGGCTACCG    | TCTTTGCTTTCTTGCTCCCTTC     |
| <i>Gh_D07G0767</i> | TTTTGGAATGGTTTACGTGGTC  | GCTGGAACACACGAACCTGG       |
| <i>Gh_D07G0768</i> | ATGGACTGCGATGGATGTGA    | CAGAACTCCGCTCTCTTGCC       |
| <i>Gh_D07G0769</i> | AGAACCAAACGCAAACCAATG   | TTCCGAACAAATCCCCGCC        |
| <i>Gh_D07G0770</i> | ATGAGGAACCGTGGAATGTGT   | TTTTGGTTACCCAATTATCTTGGA   |
| <i>Gh_D07G0771</i> | GAAGGGAAATGGCATCAAGTG   | TCCAATTATTCCTCATTCTTACAGTT |
| <i>Gh_D07G0772</i> | CACTGAACGCTCCCAGACCT    | TTACTCGGCCAACGAATCG        |
| <i>Gh_D07G0773</i> | CTCAGAATGGAACAAGGGGGA   | GCTAACATAGTGGGGGTGCTAATAC  |
| <i>Gh_D07G0774</i> | CGGAACCGAAAATCGTAGTG    | AGGGCGAAAAAGAGAGTAGAGAA    |
| <i>Gh_D07G0775</i> | AAATCTCCATCCCATCAAGTG   | AAACCTCTCTCCCATTACCC       |
| <i>Gh_D07G0776</i> | CTCAGCGAGTGATGGGGCTA    | GAATGTGGGGAATGAATAAGTGTG   |
| <i>Gh_D07G0777</i> | ATGGCAAACCTGTGTCGTATTCA | TCATCATCAACCTTCACTCGC      |

**Supplemental Table S9. The genes that are relevant to biosynthesis and transport of pigment metabolic pathways**

| Upland cotton gene | Arabidopsis gene | The description of function                                          | Metabolic pathways                                                       |
|--------------------|------------------|----------------------------------------------------------------------|--------------------------------------------------------------------------|
| <i>RE1</i>         | <i>AT2G20340</i> | Pyridoxal phosphate (PLP)-dependent transferases superfamily protein | Tyrosine metabolism<br>Isoquinoline alkaloid biosynthesis                |
| <i>RE2</i>         | <i>AT3G02580</i> | sterol 1                                                             | Steroid biosynthesis                                                     |
| <i>RE3</i>         | <i>AT5G17220</i> | glutathione S-transferase phi 12                                     | Glutathione metabolism                                                   |
| <i>RE4</i>         | <i>AT5G17230</i> | PHYTOENE SYNTHASE                                                    | Carotenoid biosynthesis                                                  |
| <i>RE5</i>         | <i>AT3G02360</i> | 6-phosphogluconate dehydrogenase family protein                      | Pentose phosphate pathway<br>Glutathione metabolism<br>Carbon metabolism |
| <i>RE6</i>         | <i>AT1G66370</i> | MYB113                                                               | Regulation of anthocyanin biosynthesis                                   |
| <i>RE7</i>         | <i>AT1G66370</i> | MYB113                                                               | Regulation of anthocyanin biosynthesis                                   |

**Supplemental Table S10. DEGs between pairwise comparisons**

Table S10 can be found at figshare Dataset. <https://doi.org/10.6084/m9.figshare.15350091.v1>



**Supplemental Table S11. Co-expression analysis of genes in MEDarkgrey module**

| <b>FromNode</b>        | <b>ToNode</b>          | <b>Weight</b> | <b>FromNode</b>        | <b>ToNode</b>          | <b>Weight</b> |
|------------------------|------------------------|---------------|------------------------|------------------------|---------------|
| <i>Ghir_A07G008080</i> | <i>Ghir_D07G008160</i> | 0.21          | <i>Ghir_D02G015000</i> | <i>Ghir_D07G020010</i> | 0.04          |
| <i>Ghir_A07G008080</i> | <i>Ghir_D06G017430</i> | 0.22          | <i>Ghir_D02G015000</i> | <i>Ghir_A13G001070</i> | 0.05          |
| <i>Ghir_A07G008080</i> | <i>Ghir_A06G000790</i> | 0.10          | <i>Ghir_D02G015000</i> | <i>Ghir_D11G021880</i> | 0.03          |
| <i>Ghir_A07G008080</i> | <i>Ghir_A06G016540</i> | 0.21          | <i>Ghir_D02G015000</i> | <i>Ghir_D13G001360</i> | 0.12          |
| <i>Ghir_A07G008080</i> | <i>Ghir_D03G005110</i> | 0.08          | <i>Ghir_D02G015000</i> | <i>Ghir_D11G026310</i> | 0.09          |
| <i>Ghir_A07G008080</i> | <i>Ghir_A13G024190</i> | 0.02          | <i>Ghir_D02G015000</i> | <i>Ghir_A11G022530</i> | 0.04          |
| <i>Ghir_A07G008080</i> | <i>Ghir_D08G023860</i> | 0.09          | <i>Ghir_D02G015000</i> | <i>Ghir_D11G008770</i> | 0.07          |
| <i>Ghir_A07G008080</i> | <i>Ghir_A03G013820</i> | 0.05          | <i>Ghir_D02G015000</i> | <i>Ghir_D12G000410</i> | 0.04          |
| <i>Ghir_A07G008080</i> | <i>Ghir_A04G008120</i> | 0.02          | <i>Ghir_D02G015000</i> | <i>Ghir_D06G013730</i> | 0.06          |
| <i>Ghir_A07G008080</i> | <i>Ghir_D02G015000</i> | 0.04          | <i>Ghir_D02G015000</i> | <i>Ghir_A05G017350</i> | 0.07          |
| <i>Ghir_A07G008080</i> | <i>Ghir_D03G000570</i> | 0.02          | <i>Ghir_D02G015000</i> | <i>Ghir_A05G018350</i> | 0.03          |
| <i>Ghir_A07G008080</i> | <i>Ghir_D08G015520</i> | 0.08          | <i>Ghir_D02G015000</i> | <i>Ghir_D11G025880</i> | 0.05          |
| <i>Ghir_A07G008080</i> | <i>Ghir_D09G010390</i> | 0.05          | <i>Ghir_D02G015000</i> | <i>Ghir_D05G017130</i> | 0.17          |
| <i>Ghir_A07G008080</i> | <i>Ghir_A08G014710</i> | 0.03          | <i>Ghir_D02G015000</i> | <i>Ghir_D12G015390</i> | 0.04          |
| <i>Ghir_A07G008080</i> | <i>Ghir_D05G019320</i> | 0.02          | <i>Ghir_D02G015000</i> | <i>Ghir_A13G021470</i> | 0.12          |
| <i>Ghir_A07G008080</i> | <i>Ghir_A13G001070</i> | 0.08          | <i>Ghir_D02G015000</i> | <i>Ghir_D08G015410</i> | 0.05          |
| <i>Ghir_A07G008080</i> | <i>Ghir_D11G021880</i> | 0.07          | <i>Ghir_D02G015000</i> | <i>Ghir_A01G022690</i> | 0.02          |
| <i>Ghir_A07G008080</i> | <i>Ghir_D13G001360</i> | 0.03          | <i>Ghir_D03G000570</i> | <i>Ghir_D05G032290</i> | 0.03          |
| <i>Ghir_A07G008080</i> | <i>Ghir_A11G022530</i> | 0.07          | <i>Ghir_D03G000570</i> | <i>Ghir_D12G015390</i> | 0.02          |
| <i>Ghir_A07G008080</i> | <i>Ghir_D11G025880</i> | 0.02          | <i>Ghir_D03G000570</i> | <i>Ghir_D11G002680</i> | 0.02          |
| <i>Ghir_A07G008080</i> | <i>Ghir_D05G017130</i> | 0.03          | <i>Ghir_D03G000570</i> | <i>Ghir_A07G000760</i> | 0.05          |
| <i>Ghir_A07G008080</i> | <i>Ghir_A07G000760</i> | 0.02          | <i>Ghir_D03G000570</i> | <i>Ghir_D13G022890</i> | 0.03          |
| <i>Ghir_D07G008160</i> | <i>Ghir_D06G017430</i> | 0.21          | <i>Ghir_D08G015520</i> | <i>Ghir_A08G014710</i> | 0.18          |
| <i>Ghir_D07G008160</i> | <i>Ghir_A06G000790</i> | 0.05          | <i>Ghir_D08G015520</i> | <i>Ghir_D07G020010</i> | 0.17          |
| <i>Ghir_D07G008160</i> | <i>Ghir_A06G016540</i> | 0.21          | <i>Ghir_D08G015520</i> | <i>Ghir_A13G001070</i> | 0.23          |
| <i>Ghir_D07G008160</i> | <i>Ghir_D03G005110</i> | 0.16          | <i>Ghir_D08G015520</i> | <i>Ghir_D11G021880</i> | 0.05          |
| <i>Ghir_D07G008160</i> | <i>Ghir_A13G024190</i> | 0.03          | <i>Ghir_D08G015520</i> | <i>Ghir_D13G001360</i> | 0.06          |
| <i>Ghir_D07G008160</i> | <i>Ghir_D08G023860</i> | 0.07          | <i>Ghir_D08G015520</i> | <i>Ghir_A11G022530</i> | 0.13          |
| <i>Ghir_D07G008160</i> | <i>Ghir_A03G013820</i> | 0.03          | <i>Ghir_D08G015520</i> | <i>Ghir_D11G008770</i> | 0.15          |
| <i>Ghir_D07G008160</i> | <i>Ghir_A04G008120</i> | 0.06          | <i>Ghir_D08G015520</i> | <i>Ghir_A05G017350</i> | 0.04          |
| <i>Ghir_D07G008160</i> | <i>Ghir_D02G015000</i> | 0.04          | <i>Ghir_D08G015520</i> | <i>Ghir_D05G017130</i> | 0.06          |
| <i>Ghir_D07G008160</i> | <i>Ghir_D03G000570</i> | 0.03          | <i>Ghir_D08G015520</i> | <i>Ghir_A01G022690</i> | 0.03          |
| <i>Ghir_D07G008160</i> | <i>Ghir_D08G015520</i> | 0.06          | <i>Ghir_D09G010390</i> | <i>Ghir_A08G014710</i> | 0.04          |
| <i>Ghir_D07G008160</i> | <i>Ghir_D09G010390</i> | 0.14          | <i>Ghir_D09G010390</i> | <i>Ghir_A13G001070</i> | 0.05          |
| <i>Ghir_D07G008160</i> | <i>Ghir_A08G014710</i> | 0.05          | <i>Ghir_D09G010390</i> | <i>Ghir_D11G021880</i> | 0.12          |
| <i>Ghir_D07G008160</i> | <i>Ghir_A13G001070</i> | 0.11          | <i>Ghir_D09G010390</i> | <i>Ghir_D13G001360</i> | 0.10          |
| <i>Ghir_D07G008160</i> | <i>Ghir_D11G021880</i> | 0.14          | <i>Ghir_D09G010390</i> | <i>Ghir_A11G022530</i> | 0.08          |
| <i>Ghir_D07G008160</i> | <i>Ghir_D13G001360</i> | 0.10          | <i>Ghir_D09G010390</i> | <i>Ghir_D12G000410</i> | 0.07          |
| <i>Ghir_D07G008160</i> | <i>Ghir_A11G022530</i> | 0.13          | <i>Ghir_D09G010390</i> | <i>Ghir_D06G013730</i> | 0.04          |
| <i>Ghir_D07G008160</i> | <i>Ghir_D11G025880</i> | 0.05          | <i>Ghir_D09G010390</i> | <i>Ghir_D11G025880</i> | 0.11          |
| <i>Ghir_D07G008160</i> | <i>Ghir_D05G017130</i> | 0.07          | <i>Ghir_D09G010390</i> | <i>Ghir_D05G017130</i> | 0.09          |

|                        |                        |      |                        |                        |      |
|------------------------|------------------------|------|------------------------|------------------------|------|
| <i>Ghir_D07G008160</i> | <i>Ghir_A01G022690</i> | 0.05 | <i>Ghir_D09G010390</i> | <i>Ghir_D08G015410</i> | 0.05 |
| <i>Ghir_D07G008160</i> | <i>Ghir_A07G000760</i> | 0.02 | <i>Ghir_D09G010390</i> | <i>Ghir_A01G022690</i> | 0.03 |
| <i>Ghir_D06G017430</i> | <i>Ghir_A06G000790</i> | 0.09 | <i>Ghir_A08G014710</i> | <i>Ghir_D07G020010</i> | 0.18 |
| <i>Ghir_D06G017430</i> | <i>Ghir_A06G016540</i> | 0.31 | <i>Ghir_A08G014710</i> | <i>Ghir_A13G001070</i> | 0.19 |
| <i>Ghir_D06G017430</i> | <i>Ghir_D03G005110</i> | 0.22 | <i>Ghir_A08G014710</i> | <i>Ghir_D11G021880</i> | 0.07 |
| <i>Ghir_D06G017430</i> | <i>Ghir_A13G024190</i> | 0.05 | <i>Ghir_A08G014710</i> | <i>Ghir_D13G001360</i> | 0.13 |
| <i>Ghir_D06G017430</i> | <i>Ghir_D04G012180</i> | 0.05 | <i>Ghir_A08G014710</i> | <i>Ghir_A11G022530</i> | 0.13 |
| <i>Ghir_D06G017430</i> | <i>Ghir_D08G023860</i> | 0.13 | <i>Ghir_A08G014710</i> | <i>Ghir_D11G008770</i> | 0.18 |
| <i>Ghir_D06G017430</i> | <i>Ghir_A03G013820</i> | 0.08 | <i>Ghir_A08G014710</i> | <i>Ghir_D12G000410</i> | 0.02 |
| <i>Ghir_D06G017430</i> | <i>Ghir_A04G008120</i> | 0.08 | <i>Ghir_A08G014710</i> | <i>Ghir_A05G017350</i> | 0.09 |
| <i>Ghir_D06G017430</i> | <i>Ghir_D02G015000</i> | 0.05 | <i>Ghir_A08G014710</i> | <i>Ghir_D11G025880</i> | 0.03 |
| <i>Ghir_D06G017430</i> | <i>Ghir_D08G015520</i> | 0.14 | <i>Ghir_A08G014710</i> | <i>Ghir_D05G017130</i> | 0.16 |
| <i>Ghir_D06G017430</i> | <i>Ghir_D09G010390</i> | 0.10 | <i>Ghir_A08G014710</i> | <i>Ghir_D08G015410</i> | 0.02 |
| <i>Ghir_D06G017430</i> | <i>Ghir_A08G014710</i> | 0.10 | <i>Ghir_A08G014710</i> | <i>Ghir_A01G022690</i> | 0.07 |
| <i>Ghir_D06G017430</i> | <i>Ghir_D07G020010</i> | 0.05 | <i>Ghir_D08G026850</i> | <i>Ghir_A01G007610</i> | 0.07 |
| <i>Ghir_D06G017430</i> | <i>Ghir_A13G001070</i> | 0.21 | <i>Ghir_D08G026850</i> | <i>Ghir_D05G033790</i> | 0.09 |
| <i>Ghir_D06G017430</i> | <i>Ghir_D11G021880</i> | 0.19 | <i>Ghir_D08G026850</i> | <i>Ghir_D05G032290</i> | 0.07 |
| <i>Ghir_D06G017430</i> | <i>Ghir_D13G001360</i> | 0.12 | <i>Ghir_D08G026850</i> | <i>Ghir_A04G003270</i> | 0.06 |
| <i>Ghir_D06G017430</i> | <i>Ghir_A11G022530</i> | 0.22 | <i>Ghir_D08G026850</i> | <i>Ghir_D05G010610</i> | 0.21 |
| <i>Ghir_D06G017430</i> | <i>Ghir_D11G008770</i> | 0.04 | <i>Ghir_D08G026850</i> | <i>Ghir_D01G007540</i> | 0.03 |
| <i>Ghir_D06G017430</i> | <i>Ghir_A05G017350</i> | 0.03 | <i>Ghir_D08G026850</i> | <i>Ghir_A04G015520</i> | 0.10 |
| <i>Ghir_D06G017430</i> | <i>Ghir_D11G025880</i> | 0.05 | <i>Ghir_D08G026850</i> | <i>Ghir_A01G014310</i> | 0.02 |
| <i>Ghir_D06G017430</i> | <i>Ghir_D05G017130</i> | 0.08 | <i>Ghir_D08G026850</i> | <i>Ghir_D12G015390</i> | 0.02 |
| <i>Ghir_D06G017430</i> | <i>Ghir_D08G015410</i> | 0.02 | <i>Ghir_D05G019320</i> | <i>Ghir_A04G014820</i> | 0.03 |
| <i>Ghir_D06G017430</i> | <i>Ghir_A01G022690</i> | 0.07 | <i>Ghir_D05G019320</i> | <i>Ghir_D12G006040</i> | 0.05 |
| <i>Ghir_A06G000790</i> | <i>Ghir_A06G016540</i> | 0.07 | <i>Ghir_D05G019320</i> | <i>Ghir_A07G000760</i> | 0.05 |
| <i>Ghir_A06G000790</i> | <i>Ghir_D03G005110</i> | 0.04 | <i>Ghir_D05G019320</i> | <i>Ghir_A03G007260</i> | 0.13 |
| <i>Ghir_A06G000790</i> | <i>Ghir_A13G024190</i> | 0.04 | <i>Ghir_D07G020010</i> | <i>Ghir_A13G001070</i> | 0.15 |
| <i>Ghir_A06G000790</i> | <i>Ghir_D04G012180</i> | 0.08 | <i>Ghir_D07G020010</i> | <i>Ghir_D11G021880</i> | 0.02 |
| <i>Ghir_A06G000790</i> | <i>Ghir_D08G023860</i> | 0.09 | <i>Ghir_D07G020010</i> | <i>Ghir_D13G001360</i> | 0.06 |
| <i>Ghir_A06G000790</i> | <i>Ghir_A03G013820</i> | 0.15 | <i>Ghir_D07G020010</i> | <i>Ghir_A11G022530</i> | 0.07 |
| <i>Ghir_A06G000790</i> | <i>Ghir_A04G008120</i> | 0.04 | <i>Ghir_D07G020010</i> | <i>Ghir_D11G008770</i> | 0.16 |
| <i>Ghir_A06G000790</i> | <i>Ghir_D02G015000</i> | 0.04 | <i>Ghir_D07G020010</i> | <i>Ghir_A05G017350</i> | 0.05 |
| <i>Ghir_A06G000790</i> | <i>Ghir_D08G015520</i> | 0.17 | <i>Ghir_D07G020010</i> | <i>Ghir_D05G017130</i> | 0.08 |
| <i>Ghir_A06G000790</i> | <i>Ghir_A08G014710</i> | 0.07 | <i>Ghir_D07G020010</i> | <i>Ghir_A01G022690</i> | 0.02 |
| <i>Ghir_A06G000790</i> | <i>Ghir_D05G019320</i> | 0.04 | <i>Ghir_A04G014820</i> | <i>Ghir_D12G006040</i> | 0.03 |
| <i>Ghir_A06G000790</i> | <i>Ghir_D07G020010</i> | 0.06 | <i>Ghir_A04G014820</i> | <i>Ghir_A05G018350</i> | 0.07 |
| <i>Ghir_A06G000790</i> | <i>Ghir_A13G001070</i> | 0.10 | <i>Ghir_A04G014820</i> | <i>Ghir_A04G015520</i> | 0.03 |
| <i>Ghir_A06G000790</i> | <i>Ghir_D13G001360</i> | 0.02 | <i>Ghir_A04G014820</i> | <i>Ghir_D12G015390</i> | 0.03 |
| <i>Ghir_A06G000790</i> | <i>Ghir_A11G022530</i> | 0.04 | <i>Ghir_A04G014820</i> | <i>Ghir_A08G018120</i> | 0.11 |
| <i>Ghir_A06G000790</i> | <i>Ghir_D11G008770</i> | 0.07 | <i>Ghir_A04G014820</i> | <i>Ghir_A07G000760</i> | 0.03 |
| <i>Ghir_A06G000790</i> | <i>Ghir_D05G017130</i> | 0.03 | <i>Ghir_A04G014820</i> | <i>Ghir_A03G007260</i> | 0.06 |
| <i>Ghir_A06G016540</i> | <i>Ghir_D03G005110</i> | 0.17 | <i>Ghir_A04G014820</i> | <i>Ghir_D05G004810</i> | 0.23 |
| <i>Ghir_A06G016540</i> | <i>Ghir_A13G024190</i> | 0.03 | <i>Ghir_A01G007610</i> | <i>Ghir_D05G033790</i> | 0.15 |

|                        |                        |      |                        |                        |      |
|------------------------|------------------------|------|------------------------|------------------------|------|
| <i>Ghir_A06G016540</i> | <i>Ghir_D04G012180</i> | 0.03 | <i>Ghir_A01G007610</i> | <i>Ghir_D05G032290</i> | 0.03 |
| <i>Ghir_A06G016540</i> | <i>Ghir_D08G023860</i> | 0.08 | <i>Ghir_A01G007610</i> | <i>Ghir_A04G003270</i> | 0.02 |
| <i>Ghir_A06G016540</i> | <i>Ghir_A03G013820</i> | 0.06 | <i>Ghir_A01G007610</i> | <i>Ghir_D05G010610</i> | 0.06 |
| <i>Ghir_A06G016540</i> | <i>Ghir_A04G008120</i> | 0.05 | <i>Ghir_A01G007610</i> | <i>Ghir_A04G015520</i> | 0.03 |
| <i>Ghir_A06G016540</i> | <i>Ghir_D02G015000</i> | 0.05 | <i>Ghir_A13G001070</i> | <i>Ghir_D11G021880</i> | 0.14 |
| <i>Ghir_A06G016540</i> | <i>Ghir_D08G015520</i> | 0.11 | <i>Ghir_A13G001070</i> | <i>Ghir_D13G001360</i> | 0.13 |
| <i>Ghir_A06G016540</i> | <i>Ghir_D09G010390</i> | 0.06 | <i>Ghir_A13G001070</i> | <i>Ghir_A11G022530</i> | 0.23 |
| <i>Ghir_A06G016540</i> | <i>Ghir_A08G014710</i> | 0.06 | <i>Ghir_A13G001070</i> | <i>Ghir_D11G008770</i> | 0.12 |
| <i>Ghir_A06G016540</i> | <i>Ghir_D07G020010</i> | 0.02 | <i>Ghir_A13G001070</i> | <i>Ghir_A05G017350</i> | 0.06 |
| <i>Ghir_A06G016540</i> | <i>Ghir_A13G001070</i> | 0.14 | <i>Ghir_A13G001070</i> | <i>Ghir_D11G025880</i> | 0.03 |
| <i>Ghir_A06G016540</i> | <i>Ghir_D11G021880</i> | 0.14 | <i>Ghir_A13G001070</i> | <i>Ghir_D05G017130</i> | 0.09 |
| <i>Ghir_A06G016540</i> | <i>Ghir_D13G001360</i> | 0.08 | <i>Ghir_A13G001070</i> | <i>Ghir_A01G022690</i> | 0.09 |
| <i>Ghir_A06G016540</i> | <i>Ghir_D11G026310</i> | 0.02 | <i>Ghir_D05G033790</i> | <i>Ghir_D05G032290</i> | 0.06 |
| <i>Ghir_A06G016540</i> | <i>Ghir_A11G022530</i> | 0.16 | <i>Ghir_D05G033790</i> | <i>Ghir_D12G006040</i> | 0.02 |
| <i>Ghir_A06G016540</i> | <i>Ghir_D11G008770</i> | 0.02 | <i>Ghir_D05G033790</i> | <i>Ghir_A04G003270</i> | 0.03 |
| <i>Ghir_A06G016540</i> | <i>Ghir_A05G017350</i> | 0.03 | <i>Ghir_D05G033790</i> | <i>Ghir_D05G010610</i> | 0.08 |
| <i>Ghir_A06G016540</i> | <i>Ghir_D11G025880</i> | 0.04 | <i>Ghir_D05G033790</i> | <i>Ghir_A04G015520</i> | 0.05 |
| <i>Ghir_A06G016540</i> | <i>Ghir_D05G017130</i> | 0.06 | <i>Ghir_D05G033790</i> | <i>Ghir_A01G014310</i> | 0.04 |
| <i>Ghir_A06G016540</i> | <i>Ghir_D08G015410</i> | 0.02 | <i>Ghir_D11G021880</i> | <i>Ghir_D13G001360</i> | 0.14 |
| <i>Ghir_A06G016540</i> | <i>Ghir_A01G022690</i> | 0.04 | <i>Ghir_D11G021880</i> | <i>Ghir_A11G022530</i> | 0.20 |
| <i>Ghir_D03G005110</i> | <i>Ghir_A13G024190</i> | 0.09 | <i>Ghir_D11G021880</i> | <i>Ghir_D12G000410</i> | 0.03 |
| <i>Ghir_D03G005110</i> | <i>Ghir_D04G012180</i> | 0.06 | <i>Ghir_D11G021880</i> | <i>Ghir_A05G017350</i> | 0.02 |
| <i>Ghir_D03G005110</i> | <i>Ghir_D08G023860</i> | 0.09 | <i>Ghir_D11G021880</i> | <i>Ghir_D11G025880</i> | 0.07 |
| <i>Ghir_D03G005110</i> | <i>Ghir_A03G013820</i> | 0.07 | <i>Ghir_D11G021880</i> | <i>Ghir_D05G017130</i> | 0.08 |
| <i>Ghir_D03G005110</i> | <i>Ghir_A04G008120</i> | 0.16 | <i>Ghir_D11G021880</i> | <i>Ghir_D08G015410</i> | 0.07 |
| <i>Ghir_D03G005110</i> | <i>Ghir_D02G015000</i> | 0.07 | <i>Ghir_D11G021880</i> | <i>Ghir_A01G022690</i> | 0.06 |
| <i>Ghir_D03G005110</i> | <i>Ghir_D08G015520</i> | 0.11 | <i>Ghir_D13G001360</i> | <i>Ghir_D11G026310</i> | 0.02 |
| <i>Ghir_D03G005110</i> | <i>Ghir_D09G010390</i> | 0.11 | <i>Ghir_D13G001360</i> | <i>Ghir_A11G022530</i> | 0.17 |
| <i>Ghir_D03G005110</i> | <i>Ghir_A08G014710</i> | 0.14 | <i>Ghir_D13G001360</i> | <i>Ghir_D11G008770</i> | 0.06 |
| <i>Ghir_D03G005110</i> | <i>Ghir_D07G020010</i> | 0.07 | <i>Ghir_D13G001360</i> | <i>Ghir_D12G000410</i> | 0.04 |
| <i>Ghir_D03G005110</i> | <i>Ghir_A13G001070</i> | 0.20 | <i>Ghir_D13G001360</i> | <i>Ghir_D06G013730</i> | 0.02 |
| <i>Ghir_D03G005110</i> | <i>Ghir_D11G021880</i> | 0.21 | <i>Ghir_D13G001360</i> | <i>Ghir_A05G017350</i> | 0.09 |
| <i>Ghir_D03G005110</i> | <i>Ghir_D13G001360</i> | 0.22 | <i>Ghir_D13G001360</i> | <i>Ghir_D11G025880</i> | 0.05 |
| <i>Ghir_D03G005110</i> | <i>Ghir_A11G022530</i> | 0.26 | <i>Ghir_D13G001360</i> | <i>Ghir_D05G017130</i> | 0.21 |
| <i>Ghir_D03G005110</i> | <i>Ghir_D11G008770</i> | 0.06 | <i>Ghir_D13G001360</i> | <i>Ghir_A13G021470</i> | 0.02 |
| <i>Ghir_D03G005110</i> | <i>Ghir_A05G017350</i> | 0.06 | <i>Ghir_D13G001360</i> | <i>Ghir_D08G015410</i> | 0.05 |
| <i>Ghir_D03G005110</i> | <i>Ghir_D11G025880</i> | 0.05 | <i>Ghir_D13G001360</i> | <i>Ghir_A01G022690</i> | 0.17 |
| <i>Ghir_D03G005110</i> | <i>Ghir_D05G017130</i> | 0.14 | <i>Ghir_D05G032290</i> | <i>Ghir_A04G003270</i> | 0.07 |
| <i>Ghir_D03G005110</i> | <i>Ghir_D08G015410</i> | 0.03 | <i>Ghir_D05G032290</i> | <i>Ghir_D05G010610</i> | 0.09 |
| <i>Ghir_D03G005110</i> | <i>Ghir_A01G022690</i> | 0.18 | <i>Ghir_D05G032290</i> | <i>Ghir_A04G015520</i> | 0.02 |
| <i>Ghir_A13G024190</i> | <i>Ghir_D04G012180</i> | 0.18 | <i>Ghir_D05G032290</i> | <i>Ghir_A01G014310</i> | 0.05 |
| <i>Ghir_A13G024190</i> | <i>Ghir_D08G023860</i> | 0.04 | <i>Ghir_D05G032290</i> | <i>Ghir_D12G015390</i> | 0.02 |
| <i>Ghir_A13G024190</i> | <i>Ghir_A03G013820</i> | 0.11 | <i>Ghir_D05G032290</i> | <i>Ghir_D11G002680</i> | 0.04 |
| <i>Ghir_A13G024190</i> | <i>Ghir_A04G008120</i> | 0.17 | <i>Ghir_D05G032290</i> | <i>Ghir_A07G000760</i> | 0.02 |

|                 |                 |      |                 |                 |      |
|-----------------|-----------------|------|-----------------|-----------------|------|
| Ghir_A13G024190 | Ghir_D02G015000 | 0.05 | Ghir_D05G032290 | Ghir_D13G022890 | 0.02 |
| Ghir_A13G024190 | Ghir_D08G015520 | 0.09 | Ghir_D12G006040 | Ghir_A04G003270 | 0.04 |
| Ghir_A13G024190 | Ghir_D09G010390 | 0.02 | Ghir_D12G006040 | Ghir_A01G014310 | 0.11 |
| Ghir_A13G024190 | Ghir_A08G014710 | 0.18 | Ghir_D12G006040 | Ghir_A07G000760 | 0.03 |
| Ghir_A13G024190 | Ghir_D07G020010 | 0.18 | Ghir_D12G006040 | Ghir_A03G007260 | 0.08 |
| Ghir_A13G024190 | Ghir_A13G001070 | 0.12 | Ghir_D12G006040 | Ghir_D05G004810 | 0.02 |
| Ghir_A13G024190 | Ghir_D11G021880 | 0.03 | Ghir_D11G026310 | Ghir_D12G000410 | 0.04 |
| Ghir_A13G024190 | Ghir_D13G001360 | 0.10 | Ghir_D11G026310 | Ghir_D06G013730 | 0.08 |
| Ghir_A13G024190 | Ghir_A11G022530 | 0.06 | Ghir_D11G026310 | Ghir_A05G017350 | 0.03 |
| Ghir_A13G024190 | Ghir_D11G008770 | 0.17 | Ghir_D11G026310 | Ghir_A05G018350 | 0.03 |
| Ghir_A13G024190 | Ghir_A05G017350 | 0.04 | Ghir_D11G026310 | Ghir_D11G025880 | 0.05 |
| Ghir_A13G024190 | Ghir_D05G017130 | 0.11 | Ghir_D11G026310 | Ghir_D05G017130 | 0.04 |
| Ghir_A13G024190 | Ghir_A01G022690 | 0.04 | Ghir_D11G026310 | Ghir_D12G015390 | 0.03 |
| Ghir_D04G012180 | Ghir_D08G023860 | 0.08 | Ghir_D11G026310 | Ghir_A13G021470 | 0.11 |
| Ghir_D04G012180 | Ghir_A03G013820 | 0.21 | Ghir_D11G026310 | Ghir_D08G015410 | 0.08 |
| Ghir_D04G012180 | Ghir_A04G008120 | 0.13 | Ghir_A04G003270 | Ghir_D05G010610 | 0.10 |
| Ghir_D04G012180 | Ghir_D02G015000 | 0.04 | Ghir_A04G003270 | Ghir_A04G015520 | 0.03 |
| Ghir_D04G012180 | Ghir_D08G015520 | 0.19 | Ghir_A04G003270 | Ghir_A01G014310 | 0.07 |
| Ghir_D04G012180 | Ghir_A08G014710 | 0.18 | Ghir_A04G003270 | Ghir_D11G002680 | 0.03 |
| Ghir_D04G012180 | Ghir_D07G020010 | 0.22 | Ghir_A04G003270 | Ghir_A07G000760 | 0.03 |
| Ghir_D04G012180 | Ghir_A13G001070 | 0.16 | Ghir_A04G003270 | Ghir_A06G016670 | 0.03 |
| Ghir_D04G012180 | Ghir_D13G001360 | 0.05 | Ghir_A04G003270 | Ghir_A03G007260 | 0.05 |
| Ghir_D04G012180 | Ghir_A11G022530 | 0.07 | Ghir_A11G022530 | Ghir_D11G008770 | 0.05 |
| Ghir_D04G012180 | Ghir_D11G008770 | 0.18 | Ghir_A11G022530 | Ghir_A05G017350 | 0.04 |
| Ghir_D04G012180 | Ghir_A05G017350 | 0.05 | Ghir_A11G022530 | Ghir_D11G025880 | 0.04 |
| Ghir_D04G012180 | Ghir_D05G017130 | 0.08 | Ghir_A11G022530 | Ghir_D05G017130 | 0.09 |
| Ghir_D08G011580 | Ghir_A10G016800 | 0.02 | Ghir_A11G022530 | Ghir_D08G015410 | 0.02 |
| Ghir_D08G011580 | Ghir_D08G026850 | 0.04 | Ghir_A11G022530 | Ghir_A01G022690 | 0.13 |
| Ghir_D08G011580 | Ghir_A04G014820 | 0.09 | Ghir_D05G010610 | Ghir_A04G015520 | 0.10 |
| Ghir_D08G011580 | Ghir_D05G032290 | 0.02 | Ghir_D05G010610 | Ghir_A01G014310 | 0.04 |
| Ghir_D08G011580 | Ghir_D12G006040 | 0.02 | Ghir_D05G010610 | Ghir_D12G015390 | 0.03 |
| Ghir_D08G011580 | Ghir_A04G003270 | 0.06 | Ghir_D05G010610 | Ghir_A08G018120 | 0.03 |
| Ghir_D08G011580 | Ghir_D05G010610 | 0.07 | Ghir_D05G010610 | Ghir_A07G000760 | 0.03 |
| Ghir_D08G011580 | Ghir_A05G018350 | 0.02 | Ghir_D05G010610 | Ghir_A06G016670 | 0.02 |
| Ghir_D08G011580 | Ghir_D07G000060 | 0.05 | Ghir_D11G008770 | Ghir_A05G017350 | 0.09 |
| Ghir_D08G011580 | Ghir_A04G015520 | 0.06 | Ghir_D11G008770 | Ghir_D05G017130 | 0.10 |
| Ghir_D08G011580 | Ghir_A01G014310 | 0.04 | Ghir_D11G008770 | Ghir_A13G021470 | 0.03 |
| Ghir_D08G011580 | Ghir_D12G015390 | 0.03 | Ghir_D11G008770 | Ghir_A01G022690 | 0.03 |
| Ghir_D08G011580 | Ghir_A08G018120 | 0.18 | Ghir_D01G007540 | Ghir_A05G018350 | 0.02 |
| Ghir_D08G011580 | Ghir_A07G000760 | 0.08 | Ghir_D01G007540 | Ghir_A04G015520 | 0.08 |
| Ghir_D08G011580 | Ghir_A06G016670 | 0.06 | Ghir_D01G007540 | Ghir_A08G018120 | 0.03 |
| Ghir_D08G011580 | Ghir_A03G007260 | 0.06 | Ghir_D01G007540 | Ghir_D01G022810 | 0.06 |
| Ghir_D08G011580 | Ghir_D13G022890 | 0.05 | Ghir_D12G000410 | Ghir_D06G013730 | 0.19 |
| Ghir_D08G011580 | Ghir_D05G004810 | 0.12 | Ghir_D12G000410 | Ghir_D11G025880 | 0.22 |

|                 |                 |      |                 |                 |      |
|-----------------|-----------------|------|-----------------|-----------------|------|
| Ghir_A10G023870 | Ghir_D12G006040 | 0.03 | Ghir_D12G000410 | Ghir_D05G017130 | 0.06 |
| Ghir_A10G023870 | Ghir_D07G000060 | 0.08 | Ghir_D12G000410 | Ghir_D08G015410 | 0.08 |
| Ghir_A10G023870 | Ghir_A01G014310 | 0.04 | Ghir_D06G013730 | Ghir_D11G025880 | 0.17 |
| Ghir_A10G023870 | Ghir_D11G002680 | 0.06 | Ghir_D06G013730 | Ghir_D05G017130 | 0.05 |
| Ghir_A10G023870 | Ghir_A07G000760 | 0.02 | Ghir_D06G013730 | Ghir_A13G021470 | 0.04 |
| Ghir_A10G023870 | Ghir_A06G016670 | 0.04 | Ghir_D06G013730 | Ghir_D08G015410 | 0.09 |
| Ghir_A10G023870 | Ghir_D13G022890 | 0.09 | Ghir_D06G013730 | Ghir_D05G017040 | 0.02 |
| Ghir_D08G023860 | Ghir_A03G013820 | 0.10 | Ghir_A05G017350 | Ghir_A05G018350 | 0.03 |
| Ghir_D08G023860 | Ghir_A04G008120 | 0.04 | Ghir_A05G017350 | Ghir_D05G017130 | 0.08 |
| Ghir_D08G023860 | Ghir_D08G015520 | 0.17 | Ghir_A05G017350 | Ghir_A13G021470 | 0.06 |
| Ghir_D08G023860 | Ghir_A08G014710 | 0.07 | Ghir_A05G017350 | Ghir_A01G022690 | 0.07 |
| Ghir_D08G023860 | Ghir_D07G020010 | 0.07 | Ghir_A05G018350 | Ghir_D05G017130 | 0.02 |
| Ghir_D08G023860 | Ghir_A13G001070 | 0.18 | Ghir_A05G018350 | Ghir_A04G015520 | 0.04 |
| Ghir_D08G023860 | Ghir_D11G021880 | 0.04 | Ghir_A05G018350 | Ghir_D12G015390 | 0.04 |
| Ghir_D08G023860 | Ghir_D13G001360 | 0.03 | Ghir_A05G018350 | Ghir_A13G021470 | 0.02 |
| Ghir_D08G023860 | Ghir_A11G022530 | 0.12 | Ghir_A05G018350 | Ghir_A08G018120 | 0.04 |
| Ghir_D08G023860 | Ghir_D11G008770 | 0.04 | Ghir_A05G018350 | Ghir_D01G022810 | 0.03 |
| Ghir_D08G023860 | Ghir_D05G017130 | 0.02 | Ghir_A05G018350 | Ghir_D05G004810 | 0.05 |
| Ghir_A10G016800 | Ghir_D02G015000 | 0.02 | Ghir_D11G025880 | Ghir_D05G017130 | 0.07 |
| Ghir_A10G016800 | Ghir_D08G026850 | 0.05 | Ghir_D11G025880 | Ghir_D08G015410 | 0.09 |
| Ghir_A10G016800 | Ghir_A01G007610 | 0.02 | Ghir_D07G000060 | Ghir_A01G014310 | 0.03 |
| Ghir_A10G016800 | Ghir_D05G033790 | 0.03 | Ghir_D07G000060 | Ghir_D11G002680 | 0.03 |
| Ghir_A10G016800 | Ghir_D05G032290 | 0.05 | Ghir_D07G000060 | Ghir_A08G018120 | 0.04 |
| Ghir_A10G016800 | Ghir_A04G003270 | 0.05 | Ghir_D07G000060 | Ghir_A07G000760 | 0.05 |
| Ghir_A10G016800 | Ghir_D05G010610 | 0.08 | Ghir_D07G000060 | Ghir_A06G016670 | 0.03 |
| Ghir_A10G016800 | Ghir_D12G015390 | 0.06 | Ghir_D07G000060 | Ghir_D01G022810 | 0.03 |
| Ghir_A10G016800 | Ghir_A13G021470 | 0.03 | Ghir_D07G000060 | Ghir_D13G022890 | 0.12 |
| Ghir_A10G016800 | Ghir_A07G000760 | 0.02 | Ghir_D07G000060 | Ghir_D05G004810 | 0.03 |
| Ghir_A03G013820 | Ghir_A04G008120 | 0.15 | Ghir_D05G017130 | Ghir_A13G021470 | 0.05 |
| Ghir_A03G013820 | Ghir_D02G015000 | 0.07 | Ghir_D05G017130 | Ghir_D08G015410 | 0.04 |
| Ghir_A03G013820 | Ghir_D08G015520 | 0.22 | Ghir_D05G017130 | Ghir_A01G022690 | 0.09 |
| Ghir_A03G013820 | Ghir_A08G014710 | 0.20 | Ghir_A04G015520 | Ghir_A01G014310 | 0.02 |
| Ghir_A03G013820 | Ghir_D07G020010 | 0.20 | Ghir_A04G015520 | Ghir_D12G015390 | 0.02 |
| Ghir_A03G013820 | Ghir_A13G001070 | 0.16 | Ghir_A04G015520 | Ghir_A08G018120 | 0.07 |
| Ghir_A03G013820 | Ghir_D11G021880 | 0.03 | Ghir_A04G015520 | Ghir_D05G004810 | 0.04 |
| Ghir_A03G013820 | Ghir_D13G001360 | 0.07 | Ghir_A01G014310 | Ghir_D11G002680 | 0.04 |
| Ghir_A03G013820 | Ghir_A11G022530 | 0.07 | Ghir_A01G014310 | Ghir_A08G018120 | 0.03 |
| Ghir_A03G013820 | Ghir_D11G008770 | 0.21 | Ghir_A01G014310 | Ghir_A07G000760 | 0.03 |
| Ghir_A03G013820 | Ghir_A05G017350 | 0.06 | Ghir_A01G014310 | Ghir_A06G016670 | 0.02 |
| Ghir_A03G013820 | Ghir_D05G017130 | 0.08 | Ghir_A01G014310 | Ghir_A03G007260 | 0.04 |
| Ghir_A03G013820 | Ghir_A13G021470 | 0.03 | Ghir_A01G014310 | Ghir_D13G022890 | 0.04 |
| Ghir_A03G013820 | Ghir_A01G022690 | 0.02 | Ghir_D12G015390 | Ghir_A08G018120 | 0.03 |
| Ghir_A04G008120 | Ghir_D02G015000 | 0.14 | Ghir_D12G015390 | Ghir_A07G000760 | 0.07 |
| Ghir_A04G008120 | Ghir_D08G015520 | 0.11 | Ghir_D12G015390 | Ghir_D01G022810 | 0.08 |

|                        |                        |      |                        |                        |      |
|------------------------|------------------------|------|------------------------|------------------------|------|
| <i>Ghir_A04G008120</i> | <i>Ghir_D09G010390</i> | 0.07 | <i>Ghir_D12G015390</i> | <i>Ghir_D05G004810</i> | 0.04 |
| <i>Ghir_A04G008120</i> | <i>Ghir_A08G014710</i> | 0.20 | <i>Ghir_A13G021470</i> | <i>Ghir_D08G015410</i> | 0.03 |
| <i>Ghir_A04G008120</i> | <i>Ghir_D07G020010</i> | 0.13 | <i>Ghir_D11G002680</i> | <i>Ghir_A07G000760</i> | 0.03 |
| <i>Ghir_A04G008120</i> | <i>Ghir_A13G001070</i> | 0.15 | <i>Ghir_D11G002680</i> | <i>Ghir_A06G016670</i> | 0.04 |
| <i>Ghir_A04G008120</i> | <i>Ghir_D11G021880</i> | 0.08 | <i>Ghir_D11G002680</i> | <i>Ghir_D13G022890</i> | 0.10 |
| <i>Ghir_A04G008120</i> | <i>Ghir_D13G001360</i> | 0.18 | <i>Ghir_A08G018120</i> | <i>Ghir_A07G000760</i> | 0.05 |
| <i>Ghir_A04G008120</i> | <i>Ghir_D11G026310</i> | 0.02 | <i>Ghir_A08G018120</i> | <i>Ghir_A06G016670</i> | 0.03 |
| <i>Ghir_A04G008120</i> | <i>Ghir_A11G022530</i> | 0.12 | <i>Ghir_A08G018120</i> | <i>Ghir_A03G007260</i> | 0.03 |
| <i>Ghir_A04G008120</i> | <i>Ghir_D11G008770</i> | 0.14 | <i>Ghir_A08G018120</i> | <i>Ghir_D01G022810</i> | 0.03 |
| <i>Ghir_A04G008120</i> | <i>Ghir_D12G000410</i> | 0.04 | <i>Ghir_A08G018120</i> | <i>Ghir_D13G022890</i> | 0.03 |
| <i>Ghir_A04G008120</i> | <i>Ghir_D06G013730</i> | 0.03 | <i>Ghir_A08G018120</i> | <i>Ghir_D05G004810</i> | 0.15 |
| <i>Ghir_A04G008120</i> | <i>Ghir_A05G017350</i> | 0.10 | <i>Ghir_A07G000760</i> | <i>Ghir_A06G016670</i> | 0.02 |
| <i>Ghir_A04G008120</i> | <i>Ghir_D11G025880</i> | 0.05 | <i>Ghir_A07G000760</i> | <i>Ghir_A03G007260</i> | 0.06 |
| <i>Ghir_A04G008120</i> | <i>Ghir_D05G017130</i> | 0.23 | <i>Ghir_A07G000760</i> | <i>Ghir_D01G022810</i> | 0.03 |
| <i>Ghir_A04G008120</i> | <i>Ghir_A13G021470</i> | 0.03 | <i>Ghir_A07G000760</i> | <i>Ghir_D13G022890</i> | 0.06 |
| <i>Ghir_A04G008120</i> | <i>Ghir_D08G015410</i> | 0.03 | <i>Ghir_A07G000760</i> | <i>Ghir_D05G004810</i> | 0.05 |
| <i>Ghir_A04G008120</i> | <i>Ghir_A01G022690</i> | 0.09 | <i>Ghir_A06G016670</i> | <i>Ghir_D13G022890</i> | 0.14 |
| <i>Ghir_D02G015000</i> | <i>Ghir_D08G015520</i> | 0.05 | <i>Ghir_A03G007260</i> | <i>Ghir_D05G004810</i> | 0.04 |
| <i>Ghir_D02G015000</i> | <i>Ghir_D09G010390</i> | 0.04 | <i>Ghir_D01G022810</i> | <i>Ghir_D05G017040</i> | 0.02 |
| <i>Ghir_D02G015000</i> | <i>Ghir_A08G014710</i> | 0.09 | <i>Ghir_D01G022810</i> | <i>Ghir_D05G004810</i> | 0.02 |

**Supplemental Table S12. Genes co-expressed with *Re***

| <b>FromNode</b> | <b>ToNode</b>          | <b>Weight</b> | <b>FromNode</b> | <b>ToNode</b>                   | <b>Weight</b> |
|-----------------|------------------------|---------------|-----------------|---------------------------------|---------------|
| <i>Re</i>       | <i>Ghir_A09G020500</i> | 0.22          | <i>Re</i>       | <i>Ghir_Scaffold2801G000010</i> | 0.17          |
| <i>Re</i>       | <i>Ghir_D09G017850</i> | 0.19          | <i>Re</i>       | <i>Ghir_D13G019870</i>          | 0.10          |
| <i>Re</i>       | <i>Ghir_A04G002480</i> | 0.16          | <i>Re</i>       | <i>Ghir_D02G011590</i>          | 0.15          |
| <i>Re</i>       | <i>Ghir_A13G002590</i> | 0.15          | <i>Re</i>       | <i>Ghir_A13G016390</i>          | 0.08          |
| <i>Re</i>       | <i>Ghir_A12G029180</i> | 0.08          | <i>Re</i>       | <i>Ghir_D02G009050</i>          | 0.12          |
| <i>Re</i>       | <i>Ghir_D12G025080</i> | 0.11          | <i>Re</i>       | <i>Ghir_A09G000020</i>          | 0.10          |
| <i>Re</i>       | <i>Ghir_D01G009790</i> | 0.12          | <i>Re</i>       | <i>Ghir_D13G013210</i>          | 0.12          |
| <i>Re</i>       | <i>Ghir_D04G007170</i> | 0.11          | <i>Re</i>       | <i>Ghir_D09G011360</i>          | 0.13          |
| <i>Re</i>       | <i>Ghir_D10G005490</i> | 0.14          | <i>Re</i>       | <i>Ghir_A11G015950</i>          | 0.19          |
| <i>Re</i>       | <i>Ghir_A05G002350</i> | 0.14          | <i>Re</i>       | <i>Ghir_D12G005700</i>          | 0.24          |
| <i>Re</i>       | <i>Ghir_A09G010930</i> | 0.19          | <i>Re</i>       | <i>Ghir_D07G017620</i>          | 0.15          |
| <i>Re</i>       | <i>Ghir_A12G025410</i> | 0.21          | <i>Re</i>       | <i>Ghir_A03G021360</i>          | 0.19          |
| <i>Re</i>       | <i>Ghir_D11G021870</i> | 0.08          | <i>Re</i>       | <i>Ghir_A05G019530</i>          | 0.03          |
| <i>Re</i>       | <i>Ghir_A08G016910</i> | 0.08          | <i>Re</i>       | <i>Ghir_D07G010950</i>          | 0.12          |
| <i>Re</i>       | <i>Ghir_D07G014480</i> | 0.09          | <i>Re</i>       | <i>Ghir_D05G009720</i>          | 0.10          |
| <i>Re</i>       | <i>Ghir_D12G010180</i> | 0.04          | <i>Re</i>       | <i>Ghir_D02G014200</i>          | 0.22          |
| <i>Re</i>       | <i>Ghir_D06G012480</i> | 0.11          | <i>Re</i>       | <i>Ghir_D11G007480</i>          | 0.06          |
|                 |                        |               | <i>Re</i>       | <i>Ghir_A06G021320</i>          | 0.14          |

**Supplemental Table S13. Primers for vector construction and functional verification**

| Forward primer (5'-3')           | Reverse primer (5'-3')          | Target                                        |
|----------------------------------|---------------------------------|-----------------------------------------------|
| AATATGGTGAAGGGAATGGC             | GGTTATGGAGGCGAATAATGAG          | RT primer for <i>Re</i>                       |
| GATGAGATGATGTGGTGGAA             | CAAACAAACATATATATTTCTGGCT       | RT primer for <i>RE8</i>                      |
| GTATTGGCTAACTGCGGTGAC            | ATCAAAAACAACAACAACCATATT        | RT primer for <i>RE3</i>                      |
| TAGCATTGCCCCATTCCC               | CTTGTCCCATCCTGACCTG             | genome sequencing of gene <i>RE3</i>          |
| AGCAGGTCAGGATGGGACA              | GTGATCAATAATTAGCGAGCTTCAT       |                                               |
| ACCGAATGAACAACCCTACA             | TAGACTGTAGGGTTGTTTCATTCCG       | genome sequencing of gene <i>RE8</i>          |
| AAAGATCCCCAAGGAAACAAAT           | GTTTCCTTGGGGATCTTTTTTC          |                                               |
| CACTCTTTACCCACTACTTATGTTA        | GGGTGAAACGTGAATGGACC            |                                               |
| TTATTAAGGCTTTTCTATCTCCCC         | GAATGAACAACCCTACAGTCTAATG       |                                               |
| AACCAGGCACTATTGACGAA             | CTAACTCTTAAAGATGAGCCTTCCAT      | promoter region sequencing of gene <i>RE8</i> |
| TTGATATCGAATTCCTGAAGATGGAGCGGCGT | TAGAACTAGTGGATCATAAAAAGCTGTTATA | primer for LUC                                |
| AAG                              | GTTAGCTTGC                      |                                               |
| GGGGACAAGTTTGTACAAAAAAGCAGGCTGC  | GGGGACCACTTTGTACAAGAAAGCTGGGTG  | Construction of 35S/Gb-EXP2                   |
| ATGGAAGGCTCATCTTTAAGAGTTA        | CTATGGGTTGAACACATTCCACAG        | overexpression vector by BP reaction          |
| ACCTTCGTGAAGTTGGGCTTAC           | CGTGCCTTGTGGCTCGTA              | RT primer for <i>CHS</i>                      |
| TGATGCAGAAGCAAAAGCCAT            | AGCTCAGTACCAGAAGGTGGGA          | RT primer for <i>CHI</i>                      |
| CAGTCACCGACGGCGAGAT              | CGAAGTCCATAGGCGTGCC             | RT primer for <i>DFR</i>                      |
| GGGCCTAGCTTGCAAGCTTCTT           | AAGCAAGAGTGTGATGGTGCCTG         | RT primer for <i>F3H</i>                      |
| GAGGCCTAGCGAGCAAAATAC            | GTGAGCTTCGACACCGAGAG            | RT primer for <i>ANR</i>                      |

|                                   |                                  |                                 |
|-----------------------------------|----------------------------------|---------------------------------|
| TCTTCTCCGCATCCCAACTA              | TCCATTGCCTTCCTCAGATT             | RT primer for <i>UFGT</i>       |
| CCGCAGCTGTGTCTATCAACAC            | AGCAAATTTCCAAGCTGCCTT            | RT primer for <i>ANS</i>        |
| CGCTCTAGAACTAGTGGATCCCTGCTTAGCAA  | CTTGATATCGAATTCCTGCAGATTAATTGGC  | primers for <i>PIF4_62sk</i>    |
| TGAACCACTGTAGT                    | TGCAACACAATAAGT                  |                                 |
| CGCTCTAGAACTAGTGGATCCATGGAAGGCTC  | CTTGATATCGAATTCCTGCAGCTATGGGTTG  | primers for <i>Re_62sk</i>      |
| ATCTTTAAGAGTTA                    | AACACATTCCACAG                   |                                 |
| CTTGATATCGAATTCCTGCAGTGTGCAATTTGC | CGCTCTAGAACTAGTGGATCCCTTTCTACTC  | primers for <i>ANSPro_0800</i>  |
| CAATATTCGTA                       | TAGGTAGCACTGAGG                  |                                 |
| CTTGATATCGAATTCCTGCAGGCGGTGGGATG  | CGCTCTAGAACTAGTGGATCCGGTAGTTGT   | primers for <i>CHIPro_0800</i>  |
| CGTTTATT                          | GATTTGTGGAGGAAAA                 |                                 |
| CTTGATATCGAATTCCTGCAGCAGGTCGCAA   | CGCTCTAGAACTAGTGGATCCTAGGACGCT   | primers for <i>F3HPro_0800</i>  |
| CTGTCAAAC                         | CATCTTCATCAC                     |                                 |
| CTTGATATCGAATTCCTGCAGTGGAGGATTGT  | CGCTCTAGAACTAGTGGATCCCCAGCAATG   | primers for <i>ANRPro_0800</i>  |
| CGGCGCA                           | ACGCAACGAAT                      |                                 |
| CTTGATATCGAATTCCTGCAGTTAGGCATTCCA | CGCTCTAGAACTAGTGGATCCAGATCCCAT   | primers for <i>DFRPro_0800</i>  |
| ATCACCAA                          | CGTTGTCTAGAAGATC                 |                                 |
| CTTGATATCGAATTCCTGCAGACCACATGGGC  | CGCTCTAGAACTAGTGGATCCTCTTTTTTCGG | primers for <i>CHSPro_0800</i>  |
| GGCACAGT                          | ATGATTACAAACAGC                  |                                 |
| CTTGATATCGAATTCCTGCAGGCACTACGAGC  | CGCTCTAGAACTAGTGGATCCACCGTACAC   | primers for <i>GSTPro_0800</i>  |
| CAACCTCTCTC                       | TTTCACTACCATTCTT                 |                                 |
| CTTGATATCGAATTCCTGCAGAACTGGTCTAA  | CGCTCTAGAACTAGTGGATCCCGGGAAAGG   | primers for <i>UFGTPro_0800</i> |
| ATCTTCTATTGGAG                    | TTGAGTTTGGAT                     |                                 |
| CAGATTACGCTCATATGTTTAAATCTGAAAGT  | TGCTTGGGTGGAATTCATTATGGTATTATTT  | <i>TT8_AD</i>                   |
| TAATGGCG                          | GATTTATCGC                       |                                 |

---



**Supplemental Table S14. Vectors used in this study**

| <b>Purpose</b>                   | <b>Vector</b>       | <b>Construct method</b> | <b>Restriction sites1 and Adapter sequence</b> | <b>Restriction sites2 and Adapter sequence</b> |
|----------------------------------|---------------------|-------------------------|------------------------------------------------|------------------------------------------------|
| Overexpression vector            | pk2GW7              | BP-LR                   | -                                              | -                                              |
| Fiber-specific expression vector | PGbEXPA2            | BP-LR                   | -                                              | -                                              |
| Subcellular localization         | pMDC83              | BP-LR                   | -                                              | -                                              |
| LUC assay                        | pGreen II 0800-62sk | infusion                | PstI: CGCTCTAGAACTAGTGGATCC                    | BamHI: CTTGATATCGAATTCCTGCAG                   |
|                                  | pGreen II 0800-LUC  | infusion                | PstI:CTTGATATCGAATTCCTGCAG                     | BamHI: CGCTCTAGAACTAGTGGATCC                   |
| Yeast two-hybrid assay           | pGBKT7              | infusion                | BamHI: ATGGAGGCCGAATTC                         | EcoR1: GCAGGTCGACGGATCC                        |
|                                  | pGADT7              | infusion                | NdeI: CAGATTACGCTCATATG                        | EcoR1: TGCTTGGGTGGAATTC                        |
| LCI assay                        | JW771               | infusion                | BamHI: CTCGGTACCCGGGATCC                       | SalI: TACGAGATCTGGTCGAC                        |
|                                  | JW772               | infusion                | BamHI: GGCGGTACCCGGGATCCA                      | SalI: AAGCTCTGCAGGTCGAC                        |
| BiFC assay                       | pXY104              | infusion                | BamHI: CAGGTACCCGGGATCC                        | SalI: GCGCTGCCCGCGTCGAC                        |
|                                  | pXY106              | infusion                | BamHI: AGGACGCCGGCGGATCC                       | SalI:AAGCTCTGCAGGTCGAC                         |
